# Supplementary material for: Cord Blood Metabolite Profiles and Their Association with Autistic Traits in Childhood
Source: MDPI journal article supplement (doi:10.3390/metabo13111140), 2023-11-09
Supplement: s1 [file s1]

## **Supplementary Material**

## **Supplementary Online Content**

**Supplemental Table S1. Non-response analysis in singleton live births with and without outcome measurements.**

**Supplemental Table S2. Cord blood metabolite concentrations (N = 783).**

**Supplemental Table S3. Associations of cord blood individual metabolites and metabolite groups with SRS scores at age 6 and 13. Basic model.**

**Supplemental Table S4. Associations of cord blood individual metabolites and metabolite groups with SRS scores at ages 6 and 13. Main model.**

**Supplemental Table S5. Associations of cord blood individual metabolites and metabolite groups with SRS scores at ages 6 and 13. Adjusted model.**

**Supplemental Table S6. Associations of cord blood metabolite ratios with SRS scores at ages 6 and 13. Basic model.**

**Supplemental Table S7. Associations of cord blood metabolite ratios with SRS scores at ages 6 and 13. Main model.**

**Supplemental Table S8. Associations of cord blood metabolite ratios with SRS scores at ages 6 and 13. Adjusted model.**

**Supplemental Table S9. P-values of interaction effects of linear mixed-effect models.**

**Supplemental Table S10. Parameters for mass-spectrometry detection and identifications**

**Supplemental Figure S1. Difference in SRS score at age 13 per SDS increase in cord-blood metabolite concentration**

**Supplemental Text S1. Metabolite measurements.**

This supplementary material has been provided by the authors to give readers additional information about their work

**Supplemental Table S1. Non-response analysis in singleton live births with and without outcome measurements.**

|                                                                         | Children included in the analysis<br>(n= 783) | Children not included in the analysis<br>(n= 138) | p-value |
|-------------------------------------------------------------------------|-----------------------------------------------|---------------------------------------------------|---------|
| <b>Maternal characteristics</b>                                         |                                               |                                                   |         |
| Age at enrollment years, mean ( $\pm$ SD)                               | 31.83 (3.88)                                  | 29.78 (4.98)                                      | <0.01   |
| Missing (%)                                                             | 0                                             |                                                   |         |
| Education level, high, n (%)                                            | 510 (66%)                                     | 60 (43%)                                          | <0.01   |
| Missing                                                                 | 7 (1%)                                        | 0 (0%)                                            |         |
| Parity, n (%)                                                           |                                               |                                                   |         |
| Nullipara                                                               | 490 (62%)                                     | 67 (49%)                                          | <0.01   |
| Multipara                                                               | 293 (38%)                                     | 71 (51%)                                          |         |
| Pre-pregnancy body mass index in kg/m <sup>2</sup> , median (95% range) | 22.38 (18.54, 34.02)                          | 22.68 (18.27, 32.97)                              | 0.64    |
| Smoking, n (%)                                                          |                                               |                                                   |         |
| Never smoked during pregnancy                                           | 555 (79%)                                     | 81 (60%)                                          | <0.01   |
| Smoked until pregnancy was recognized                                   | 63 (9%)                                       | 16 (12%)                                          |         |
| Continued smoking during pregnancy                                      | 84 (12%)                                      | 38 (28%)                                          |         |
| Missing                                                                 | 81 (10%)                                      | 3 (2%)                                            |         |
| Alcohol use, n (%)                                                      |                                               |                                                   |         |
| Never alcohol in pregnancy                                              | 207 (30%)                                     | 58 (43%)                                          | <0.01   |
| Alcohol until pregnancy was known                                       | 103 (15%)                                     | 31 (23%)                                          |         |
| Alcohol continued in pregnancy                                          | 389 (56%)                                     | 46 (34%)                                          |         |
| Missing                                                                 | 85 (11%)                                      | 3 (2%)                                            |         |
| Psychopathologies, median, (95% range)                                  | 0.12 (0.00, 1.00)                             | 0.13 (0.00, 1.00)                                 | 0.07    |
| Folic acid supplement, yes, n (%)                                       | 600 (93%)                                     | 95 (81%)                                          | <0.01   |
| Missing                                                                 | 137 (17%)                                     | 20 (15%)                                          |         |

|                                                                                                                                                                                                                                                                                                                                                                                                            |                      |                      |      |
|------------------------------------------------------------------------------------------------------------------------------------------------------------------------------------------------------------------------------------------------------------------------------------------------------------------------------------------------------------------------------------------------------------|----------------------|----------------------|------|
| Vitamin D deficiency, yes, n (%)                                                                                                                                                                                                                                                                                                                                                                           | 221 (30%)            | 43 (34%)             | 0.40 |
| Missing                                                                                                                                                                                                                                                                                                                                                                                                    | 50 (6%)              | 13 (10%)             |      |
| <b>Fetal characteristics</b>                                                                                                                                                                                                                                                                                                                                                                               |                      |                      |      |
| Fetal sex, female, n (%)                                                                                                                                                                                                                                                                                                                                                                                   | 372 (48%)            | 52 (38%)             | 0.04 |
| Gestational age at birth in weeks, median (95% range)                                                                                                                                                                                                                                                                                                                                                      | 40.29 (36.94, 42.43) | 40.14 (35.75, 42.22) | 0.39 |
| Birthweight in grams, mean ( $\pm$ SD)                                                                                                                                                                                                                                                                                                                                                                     | 3550 (496.00)        | 3505 (604.31)        | 0.51 |
| Birthweight <2500 g, n (%)                                                                                                                                                                                                                                                                                                                                                                                 | 16 (2%)              | 8 (6%)               |      |
| Birthweight 2500 to 4500 g, n (%)                                                                                                                                                                                                                                                                                                                                                                          | 744 (95%)            | 125 (91%)            |      |
| Birthweight >4500 g, n (%)                                                                                                                                                                                                                                                                                                                                                                                 | 23 (3%)              | 5 (3%)               |      |
| <b>SRS: Social Responsiveness Scale. Values presented as mean (<math>\pm</math> standard deviation (SD)), median (interquartile range (95% range)), or number of participants (valid %). Differences in subject characteristics between the groups were evaluated using Independent Student T-test and Mann-Whitney U for continuous variables and <math>\chi^2</math> tests for categorical variables</b> |                      |                      |      |

**Supplemental Table S2. Cord blood metabolite concentrations (N = 783).**

| <b>Neonatal metabolite profile</b> | <b>μmol/L, median (95%)</b> |
|------------------------------------|-----------------------------|
| <b>Amino acids (AA)</b>            | 4559.70 (3014.71, 6337.24)  |
| BCAA                               | 475.26 (298.9, 695.87)      |
| AAA                                | 254.38 (162.24, 366.92)     |
| EAA                                | 1459.98 (986.42, 1991.98)   |
| NEAA                               | 2371.41 (1525.62, 3373.66)  |
| <b>Ala</b>                         | 585.97 (332.78, 991.64)     |
| <b>Arg</b>                         | 74.97 (31.63, 130.81)       |
| <b>Asn</b>                         | 56.16 (34.04, 93.81)        |
| <b>Asp</b>                         | 40.2 (21.34, 78.55)         |
| <b>Cit</b>                         | 13.86 (7.85, 23.96)         |
| <b>Gln</b>                         | 441.71 (234.59, 821.19)     |
| <b>Glu</b>                         | 195.59 (97.62, 403.82)      |
| <b>Gly</b>                         | 323.66 (211.94, 475.99)     |
| <b>His</b>                         | 133.14 (78.28, 215.38)      |
| <b>Ile</b>                         | 73.55 (42.01, 113.11)       |
| <b>Leu</b>                         | 142.1 (84.82, 226.71)       |
| <b>Lys</b>                         | 335.61 (219.23, 551.42)     |
| <b>Met</b>                         | 32.76 (19.98, 52.74)        |
| <b>Orn</b>                         | 123.84 (68.92, 205.85)      |
| <b>Phe</b>                         | 104.7 (65.43, 156.56)       |
| <b>Pro</b>                         | 191.37 (120.32, 334.64)     |
| <b>Trp</b>                         | 74.59 (45.16, 122.55)       |
| <b>Ser</b>                         | 158.25 (95.61, 298.74)      |
| <b>Thr</b>                         | 270.23 (150.48, 445.86)     |
| <b>Tyr</b>                         | 74.83 (46.54, 114.44)       |
| <b>Val</b>                         | 258.67 (165.83, 375.7)      |
| <b>Cys</b>                         | 16.08 (7.04, 40.46)         |

|                                          |                        |
|------------------------------------------|------------------------|
| <b>Non-esterified fatty acids (NEFA)</b> | 191.32 (80.28, 408.50) |
| Saturated NEFA                           | 90.71 (36.88, 189.41)  |
| Mono-unsaturated NEFA                    | 56.54 (20.44, 134.89)  |
| Poly-unsaturated NEFA                    | 44.12 (19.45, 93.88)   |
| <b>NEFA.14:0</b>                         | 7.22 (2.36, 17.39)     |
| <b>NEFA.15:0</b>                         | 1.06 (0.35, 2.56)      |
| <b>NEFA.16:0</b>                         | 67.21 (26.41, 141.04)  |
| <b>NEFA.17:0</b>                         | 1.1 (0.47, 2.28)       |
| <b>NEFA.18:0</b>                         | 13.73 (3.25, 30.25)    |
| <b>NEFA.24:0</b>                         | 0.17 (0.06, 0.31)      |
| <b>NEFA.26:0</b>                         | 0.14 (0.05, 0.31)      |
| <b>NEFA.14:1</b>                         | 1.55 (0.37, 4.46)      |
| <b>NEFA.16:1</b>                         | 10.02 (2.96, 28.71)    |
| <b>NEFA.17:1</b>                         | 0.53 (0.14, 1.37)      |
| <b>NEFA.18:1</b>                         | 42.89 (16.05, 99.56)   |
| <b>NEFA.19:1</b>                         | 0.15 (0.06, 0.33)      |
| <b>NEFA.20:1</b>                         | 0.41 (0.16, 0.86)      |
| <b>NEFA.24:1</b>                         | 0.17 (0.05, 0.32)      |
| <b>NEFA.26:1</b>                         | 0.09 (0.05, 0.16)      |
| <b>NEFA.16:2</b>                         | 0.47 (0.17, 1.16)      |
| <b>NEFA.17:2</b>                         | 0.03 (0, 0.09)         |
| <b>NEFA.18:2</b>                         | 24.07 (8.55, 58.41)    |
| <b>NEFA.18:3</b>                         | 2.06 (0.44, 6.03)      |
| <b>NEFA.20:2</b>                         | 0.55 (0.22, 1.12)      |
| <b>NEFA.20:3</b>                         | 1.79 (0.78, 4.03)      |
| <b>NEFA.20:4</b>                         | 8.1 (3.65, 15.91)      |
| <b>NEFA.20:5</b>                         | 0.28 (0.09, 0.78)      |
| <b>NEFA.22:3</b>                         | 0.13 (0.07, 0.25)      |
| <b>NEFA.22:4</b>                         | 0.62 (0.33, 1.18)      |

|                                                |                       |
|------------------------------------------------|-----------------------|
| <b>NEFA.22:5</b>                               | 0.74 (0.35, 1.56)     |
| <b>NEFA.22:6</b>                               | 4.2 (1.83, 9.4)       |
| <b>NEFA.24:2</b>                               | 0.09 (0.05, 0.18)     |
| <b>NEFA.24:4</b>                               | 0.12 (0.06, 0.22)     |
| <b>NEFA.24:5</b>                               | 0.1 (0.05, 0.2)       |
| <b>NEFA.26:2</b>                               | 0.06 (0.03, 0.1)      |
| <b>Acyl-alkyl-phosphatidylcholines (PC.ae)</b> | 74.01 (47.44, 129.47) |
| Saturated PC.ae                                | 12.10 (7.22, 21.14)   |
| Mono-unsaturated PC.ae                         | 8.54 (5.13, 15.96)    |
| Poly-unsaturated PC.ae                         | 52.99 (33.05, 93.64)  |
| <b>PC.ae.C30:0</b>                             | 0.23 (0.08, 0.47)     |
| <b>PC.ae.C32:0</b>                             | 2.37 (1.3, 4.48)      |
| <b>PC.ae.C34:0</b>                             | 0.8 (0.4, 1.77)       |
| <b>PC.ae.C36:0</b>                             | 0.54 (0.28, 1.07)     |
| <b>PC.ae.C38:0</b>                             | 0.95 (0.44, 1.87)     |
| <b>PC.ae.C40:0</b>                             | 7.11 (3.69, 12.99)    |
| <b>PC.ae.C32:1</b>                             | 2.08 (1.06, 4.22)     |
| <b>PC.ae.C34:1</b>                             | 3.72 (2.04, 7.4)      |
| <b>PC.ae.C36:1</b>                             | 1.76 (0.96, 3.38)     |
| <b>PC.ae.C40:1</b>                             | 0.68 (0.25, 1.39)     |
| <b>PC.ae.C42:1</b>                             | 0.27 (0.11, 0.54)     |
| <b>PC.ae.C32:2</b>                             | 0.44 (0.19, 0.95)     |
| <b>PC.ae.C34:2</b>                             | 2.43 (1.38, 4.82)     |
| <b>PC.ae.C34:3</b>                             | 1.1 (0.57, 2.35)      |
| <b>PC.ae.C36:2</b>                             | 0.08 (0.02, 0.18)     |
| <b>PC.ae.C36:3</b>                             | 2.02 (1.12, 4.02)     |
| <b>PC.ae.C36:4</b>                             | 1.91 (1.01, 3.72)     |
| <b>PC.ae.C36:5</b>                             | 8.64 (5.07, 15.86)    |
| <b>PC.ae.C38:2</b>                             | 6.45 (3.56, 12.69)    |
| <b>PC.ae.C38:3</b>                             | 0.5 (0.15, 1.17)      |
| <b>PC.ae.C38:4</b>                             | 1.65 (0.83, 3.2)      |

|                                            |                          |
|--------------------------------------------|--------------------------|
| <b>PC.ae.C38:5</b>                         | 7.55 (4.5, 13.67)        |
| <b>PC.ae.C38:6</b>                         | 3.31 (1.97, 6.23)        |
| <b>PC.ae.C40:2</b>                         | 0.43 (0.06, 1.27)        |
| <b>PC.ae.C40:3</b>                         | 0.46 (0.17, 1.06)        |
| <b>PC.ae.C40:4</b>                         | 1.8 (0.92, 3.37)         |
| <b>PC.ae.C40:5</b>                         | 1.53 (0.85, 2.92)        |
| <b>PC.ae.C40:6</b>                         | 2.16 (1.16, 4.04)        |
| <b>PC.ae.C42:3</b>                         | 0.28 (0.08, 0.64)        |
| <b>PC.ae.C42:4</b>                         | 0.53 (0.2, 1.08)         |
| <b>PC.ae.C42:5</b>                         | 1.1 (0.5, 2.32)          |
| <b>PC.ae.C42:6</b>                         | 0.9 (0.44, 1.78)         |
| <b>Diacyl-phosphatidylcholines (PC.aa)</b> | 754.37 (456.57, 1266.98) |
| Saturated PC.aa                            | 18.03 (10.46, 32.55)     |
| Mono-unsaturated PC.aa                     | 128.03 (75.83, 241.68)   |
| Poly-unsaturated PC.aa                     | 607.24 (375.07, 1022.96) |
| <b>PC.aa.C30:0</b>                         | 2.8 (1.43, 5.48)         |
| <b>PC.aa.C32:0</b>                         | 11.53 (6.25, 21.41)      |
| <b>PC.aa.C36:0</b>                         | 1.11 (0.43, 2.16)        |
| <b>PC.aa.C38:0</b>                         | 1.48 (0.65, 3.03)        |
| <b>PC.aa.C40:0</b>                         | 0.51 (0.21, 1.06)        |
| <b>PC.aa.C42:0</b>                         | 0.57 (0.27, 1.15)        |
| <b>PC.aa.C32:1</b>                         | 9.92 (4.82, 22.65)       |
| <b>PC.aa.C34:1</b>                         | 97.7 (57.53, 184.23)     |
| <b>PC.aa.C36:1</b>                         | 19.62 (11.2, 35.31)      |
| <b>PC.aa.C40:1</b>                         | 0.22 (0.05, 0.48)        |
| <b>PC.aa.C30:3</b>                         | 0.13 (0.06, 0.26)        |
| <b>PC.aa.C32:2</b>                         | 0.67 (0.06, 1.98)        |
| <b>PC.aa.C32:3</b>                         | 0.3 (0.1, 0.61)          |
| <b>PC.aa.C34:2</b>                         | 67.54 (37.97, 130.74)    |
| <b>PC.aa.C34:3</b>                         | 2.55 (1.24, 5.36)        |
| <b>PC.aa.C34:4</b>                         | 0.42 (0.19, 0.84)        |



|                                                  |                        |
|--------------------------------------------------|------------------------|
| <b>PC.aa.C34:5</b>                               | 0.05 (0.01, 0.11)      |
| <b>PC.aa.C36:2</b>                               | 39.26 (22.45, 70.09)   |
| <b>PC.aa.C36:3</b>                               | 66.62 (34.96, 124.29)  |
| <b>PC.aa.C36:4</b>                               | 141.64 (76.42, 241.79) |
| <b>PC.aa.C36:5</b>                               | 4.69 (2.31, 10.5)      |
| <b>PC.aa.C36:6</b>                               | 0.24 (0.09, 0.51)      |
| <b>PC.aa.C38:2</b>                               | 2.85 (1.08, 5.7)       |
| <b>PC.aa.C38:3</b>                               | 42.95 (22.16, 77.88)   |
| <b>PC.aa.C38:4</b>                               | 100.53 (59.4, 173.86)  |
| <b>PC.aa.C38:5</b>                               | 22.07 (12.7, 40.09)    |
| <b>PC.aa.C38:6</b>                               | 69.01 (36.57, 132.27)  |
| <b>PC.aa.C40:2</b>                               | 0.14 (0.03, 0.36)      |
| <b>PC.aa.C40:3</b>                               | 0.41 (0.14, 0.9)       |
| <b>PC.aa.C40:4</b>                               | 2.86 (1.52, 5.57)      |
| <b>PC.aa.C40:5</b>                               | 6.73 (3.35, 13.8)      |
| <b>PC.aa.C40:6</b>                               | 30.29 (14.44, 58.62)   |
| <b>PC.aa.C42:5</b>                               | 0.35 (0.15, 0.64)      |
| <b>PC.aa.C43:6</b>                               | 1.71 (0.85, 3.37)      |
| <b>PC.aa.C44:12</b>                              | 0.29 (0.15, 0.58)      |
| <b>Acyl-lysophosphatidylcholines (Lyso.PC.a)</b> | 143.63 (82.90, 227.75) |
| Saturated Lyso.PC.a                              | 91.52 (54.15, 150.48)  |
| Mono-unsaturated Lyso.PC.a                       | 17.74 (9.13, 32.55)    |
| Poly-unsaturated Lyso.PC.a                       | 32.48 (17.21, 57.26)   |
| <b>Lyso.PC.a.C14:0</b>                           | 3.25 (1.53, 5.85)      |
| <b>Lyso.PC.a.C16:0</b>                           | 72.5 (42.25, 119.57)   |
| <b>Lyso.PC.a.C18:0</b>                           | 15.31 (9.41, 25.72)    |
| <b>Lyso.PC.a.C16:1</b>                           | 4.73 (2.25, 8.94)      |
| <b>Lyso.PC.a.C18:1</b>                           | 13.04 (6.76, 23.37)    |
| <b>Lyso.PC.a.C18:2</b>                           | 11.95 (5.79, 22.74)    |
| <b>Lyso.PC.a.C18:3</b>                           | 0.29 (0.09, 0.69)      |
| <b>Lyso.PC.a.C20:3</b>                           | 3.88 (1.75, 7.38)      |

|                                                   |                         |
|---------------------------------------------------|-------------------------|
| <b>Lyso.PC.a.C20:4</b>                            | 13.34 (6.57, 24.91)     |
| <b>Lyso.PC.a.C20:5</b>                            | 0.28 (0.08, 0.66)       |
| <b>Lyso.PC.a.C22:6</b>                            | 2.47 (1.19, 4.81)       |
| <b>Alkyl-lysophosphatidylcholines (Lyso.PC.e)</b> | 1.66 (0.85, 2.97)       |
| Saturated Lyso.PC.e                               | 1.38 (0.67, 2.56)       |
| Mono-unsaturated Lyso.PC.e                        | 0.28 (0.11, 0.50)       |
| <b>Lyso.PC.e.C16:0</b>                            | 0.55 (0.27, 1.05)       |
| <b>Lyso.PC.e.C18:0</b>                            | 0.85 (0.32, 1.65)       |
| <b>Lyso.PC.e.C18:1</b>                            | 0.28 (0.11, 0.5)        |
| <b>Sphingomyelines (SM)</b>                       | 221.43 (132.78, 376.82) |
| Mono-unsaturated SM                               | 106.85 (66.70, 181.12)  |
| Poly-unsaturated SM                               | 113.43 (64.97, 205.09)  |
| <b>SM.a.C30:1</b>                                 | 0.14 (0.04, 0.28)       |
| <b>SM.a.C32:1</b>                                 | 3.03 (1.65, 5.23)       |
| <b>SM.a.C33:1</b>                                 | 2.2 (1.17, 3.95)        |
| <b>SM.a.C34:1</b>                                 | 54.84 (34.14, 96.11)    |
| <b>SM.a.C35:1</b>                                 | 1.66 (0.91, 3.13)       |
| <b>SM.a.C36:1</b>                                 | 19.45 (11.19, 32.72)    |
| <b>SM.a.C37:1</b>                                 | 0.96 (0.43, 1.85)       |
| <b>SM.a.C39:1</b>                                 | 1.35 (0.64, 2.83)       |
| <b>SM.a.C41:1</b>                                 | 3.97 (2.12, 7.75)       |
| <b>SM.a.C42:1</b>                                 | 17.97 (10.4, 31.14)     |
| <b>SM.a.C43:1</b>                                 | 0.95 (0.49, 1.91)       |
| <b>SM.a.C32:2</b>                                 | 0.45 (0.22, 0.87)       |
| <b>SM.a.C34:2</b>                                 | 11.21 (6.09, 20.06)     |
| <b>SM.a.C36:2</b>                                 | 12.55 (6.69, 23.45)     |
| <b>SM.a.C36:3</b>                                 | 0.35 (0.13, 0.74)       |
| <b>SM.a.C38:2</b>                                 | 6.09 (2.92, 14.03)      |
| <b>SM.a.C38:3</b>                                 | 0.2 (0.07, 0.34)        |
| <b>SM.a.C39:2</b>                                 | 0.46 (0.17, 0.83)       |
| <b>SM.a.C40:2</b>                                 | 11.81 (5.29, 25.11)     |
| <b>SM.a.C40:5</b>                                 | 0.27 (0.12, 0.54)       |

|                                |                      |
|--------------------------------|----------------------|
| <b>SM.a.C41:2</b>              | 3.42 (1.66, 6.89)    |
| <b>SM.a.C42:2</b>              | 34.97 (19.17, 64.49) |
| <b>SM.a.C42:3</b>              | 18.22 (8.67, 35.67)  |
| <b>SM.a.C42:4</b>              | 6.78 (3.65, 12.12)   |
| <b>SM.a.C42:6</b>              | 2.8 (1.52, 5.34)     |
| <b>SM.a.C43:2</b>              | 1.27 (0.61, 2.41)    |
| <b>SM.a.C44:6</b>              | 1.4 (0.58, 2.56)     |
| <b>SM.e.C36:2</b>              | 0.24 (0.11, 0.49)    |
| <b>SM.a.C38:3</b>              | 0.06 (0.02, 0.15)    |
| <b>SM.a.C40:5</b>              | 0.22 (0.1, 0.42)     |
| <b>Free Carn</b>               | 16.31 (9.83, 27.66)  |
| <b>Acyl-carnitine (Carn.a)</b> | 5.82 (3.51, 10.21)   |
| Short-chain Carn.a             | 4.45 (2.44, 8.53)    |
| Medium-chain Carn.a            | 0.51 (0.29, 0.87)    |
| Long-chain Carn.a              | 0.85 (0.49, 1.31)    |
| <b>Carn.a.C2:0</b>             | 3.73 (1.91, 7.44)    |
| <b>Carn.a.C3:0</b>             | 0.3 (0.16, 0.61)     |
| <b>Carn.a.C3:0.DC</b>          | 0.11 (0.04, 0.33)    |
| <b>Carn.a.C4:0</b>             | 0.14 (0.08, 0.26)    |
| <b>Carn.a.C5:0</b>             | 0.14 (0.06, 0.32)    |
| <b>Carn.a.C6:0</b>             | 0.05 (0.02, 0.12)    |
| <b>Carn.a.C6:0.OH</b>          | 0.04 (0.02, 0.09)    |
| <b>Carn.a.C8:0</b>             | 0.06 (0.02, 0.13)    |
| <b>Carn.a.C8:1</b>             | 0.05 (0.02, 0.11)    |
| <b>Carn.a.C9:0</b>             | 0.02 (0.01, 0.04)    |
| <b>Carn.a.C10:0</b>            | 0.09 (0.04, 0.18)    |
| <b>Carn.a.C10:1</b>            | 0.08 (0.04, 0.14)    |
| <b>Carn.a.C12:0</b>            | 0.1 (0.05, 0.18)     |
| <b>Carn.a.C14:1</b>            | 0.05 (0.02, 0.12)    |
| <b>Carn.a.C14:2</b>            | 0.03 (0.01, 0.07)    |
| <b>Carn.a.C15:0</b>            | 0.04 (0.02, 0.07)    |
| <b>Carn.a.C16:0</b>            | 0.16 (0.09, 0.28)    |

|                         |                   |
|-------------------------|-------------------|
| <b>Carn.a.C16:0.Oxo</b> | 0.02 (0.01, 0.04) |
| <b>Carn.a.C16:1</b>     | 0.11 (0.05, 0.2)  |
| <b>Carn.a.C16:2</b>     | 0.03 (0.02, 0.06) |
| <b>Carn.a.C18:0</b>     | 0.09 (0.05, 0.15) |
| <b>Carn.a.C18:1</b>     | 0.09 (0.05, 0.16) |
| <b>Carn.a.C18:2</b>     | 0.07 (0.03, 0.12) |
| <b>Carn.a.C18:2.OH</b>  | 0.02 (0.01, 0.04) |
| <b>Carn.a.C20:0</b>     | 0.03 (0.02, 0.05) |
| <b>Carn.a.C20:1</b>     | 0 (0, 0)          |
| <b>Carn.a.C20:3</b>     | 0.06 (0.03, 0.1)  |
| <b>Carn.a.C20:4</b>     | 0 (0, 0.01)       |

---

Values presented as medians (95% range) of neonatal metabolites in cord blood (μmol/L)

---

**Supplemental Table S3.** Associations of cord-blood individual metabolites and metabolite groups with SRS scores at age 6 and 13. Basic model.

| Metabolite | Differences in SRS score age 6<br>N = 716 |                            | Differences in SRS score age 13<br>N = 648 |                            |
|------------|-------------------------------------------|----------------------------|--------------------------------------------|----------------------------|
|            | P-value                                   | Estimate<br>(95%-Interval) | P-value                                    | Estimate<br>(95%-Interval) |
| Ala        | 0.92                                      | -0.02 ( -0.32 - 0.27 )     | 0.51                                       | 0.25 ( -0.05 - 0.55 )      |
| Arg        | 0.35                                      | -0.21 ( -0.5 - 0.08 )      | 0.76                                       | 0.1 ( -0.2 - 0.4 )         |
| Asn        | 0.97                                      | -0.01 ( -0.3 - 0.29 )      | 0.45                                       | 0.3 ( 0 - 0.6 )            |
| Asp        | 0.42                                      | 0.19 ( -0.1 - 0.48 )       | 0.45                                       | 0.31 ( 0 - 0.62 )          |
| Cit        | 0.71                                      | 0.1 ( -0.2 - 0.39 )        | 0.54                                       | 0.22 ( -0.07 - 0.52 )      |
| Gln        | 0.81                                      | 0.06 ( -0.23 - 0.35 )      | 0.72                                       | 0.14 ( -0.17 - 0.45 )      |
| Glu        | 0.37                                      | 0.21 ( -0.09 - 0.51 )      | 0.51                                       | 0.28 ( -0.02 - 0.58 )      |
| Gly        | 0.75                                      | 0.08 ( -0.21 - 0.37 )      | 0.51                                       | 0.26 ( -0.04 - 0.57 )      |
| His        | 0.74                                      | -0.08 ( -0.38 - 0.21 )     | 0.65                                       | 0.16 ( -0.13 - 0.46 )      |
| Ile        | 0.56                                      | 0.13 ( -0.16 - 0.43 )      | 0.54                                       | 0.23 ( -0.07 - 0.53 )      |
| Leu        | 0.82                                      | 0.05 ( -0.24 - 0.34 )      | 0.51                                       | 0.26 ( -0.05 - 0.56 )      |
| Lys        | 0.60                                      | 0.12 ( -0.17 - 0.41 )      | 0.87                                       | 0.05 ( -0.25 - 0.36 )      |
| Met        | 0.93                                      | -0.02 ( -0.31 - 0.28 )     | 0.45                                       | 0.32 ( 0.01 - 0.62 )       |
| Orn        | 0.21                                      | 0.3 ( 0.01 - 0.6 )         | 0.45                                       | 0.3 ( 0 - 0.6 )            |
| Phe        | 0.84                                      | 0.04 ( -0.25 - 0.33 )      | 0.62                                       | 0.19 ( -0.12 - 0.49 )      |
| Pro        | 0.45                                      | 0.18 ( -0.12 - 0.47 )      | 0.51                                       | 0.27 ( -0.03 - 0.58 )      |
| Trp        | 0.41                                      | -0.19 ( -0.48 - 0.1 )      | 0.89                                       | 0.04 ( -0.26 - 0.35 )      |
| Ser        | 0.30                                      | 0.25 ( -0.05 - 0.54 )      | 0.51                                       | 0.26 ( -0.05 - 0.56 )      |
| Thr        | 0.82                                      | -0.05 ( -0.34 - 0.24 )     | 0.51                                       | 0.27 ( -0.03 - 0.56 )      |
| Tyr        | 0.82                                      | 0.05 ( -0.24 - 0.35 )      | 0.59                                       | 0.19 ( -0.11 - 0.5 )       |
| Val        | 0.88                                      | 0.03 ( -0.26 - 0.32 )      | 0.51                                       | 0.26 ( -0.04 - 0.57 )      |
| Cys        | 0.80                                      | 0.06 ( -0.22 - 0.35 )      | 0.89                                       | 0.04 ( -0.26 - 0.35 )      |
| NEFA_14_0  | 0.08                                      | -0.4 ( -0.69 - -0.11 )     | 0.87                                       | 0.05 ( -0.25 - 0.35 )      |
| NEFA_15_0  | 0.06                                      | -0.44 ( -0.74 - -0.15 )    | 0.96                                       | -0.02 ( -0.32 - 0.28 )     |
| NEFA_16_0  | 0.67                                      | -0.1 ( -0.39 - 0.19 )      | 0.54                                       | 0.21 ( -0.09 - 0.51 )      |
| NEFA_17_0  | 0.26                                      | -0.26 ( -0.55 - 0.03 )     | 0.83                                       | 0.07 ( -0.22 - 0.37 )      |
| NEFA_18_0  | 0.82                                      | 0.05 ( -0.24 - 0.34 )      | 0.51                                       | 0.27 ( -0.03 - 0.57 )      |
| NEFA_24_0  | 0.60                                      | -0.12 ( -0.41 - 0.17 )     | 0.54                                       | 0.21 ( -0.09 - 0.5 )       |
| NEFA_26_0  | 0.33                                      | -0.22 ( -0.52 - 0.07 )     | 0.65                                       | 0.16 ( -0.13 - 0.46 )      |
| NEFA_14_1  | 0.06                                      | -0.44 ( -0.74 - -0.15 )    | 0.88                                       | -0.05 ( -0.35 - 0.26 )     |
| NEFA_16_1  | 0.17                                      | -0.33 ( -0.62 - -0.04 )    | 0.96                                       | -0.01 ( -0.32 - 0.29 )     |
| NEFA_17_1  | 0.10                                      | -0.39 ( -0.68 - -0.09 )    | 0.96                                       | -0.02 ( -0.32 - 0.28 )     |
| NEFA_18_1  | 0.26                                      | -0.27 ( -0.56 - 0.02 )     | 0.77                                       | 0.09 ( -0.21 - 0.39 )      |

|             |      |                         |      |                         |
|-------------|------|-------------------------|------|-------------------------|
| NEFA_19_1   | 0.09 | -0.39 ( -0.68 - -0.1 )  | 0.92 | 0.03 ( -0.27 - 0.33 )   |
| NEFA_20_1   | 0.47 | -0.17 ( -0.46 - 0.13 )  | 0.76 | 0.11 ( -0.19 - 0.41 )   |
| NEFA_24_1   | 0.52 | -0.15 ( -0.44 - 0.14 )  | 0.51 | 0.26 ( -0.04 - 0.56 )   |
| NEFA_26_1   | 0.52 | -0.15 ( -0.44 - 0.14 )  | 0.65 | 0.17 ( -0.13 - 0.47 )   |
| NEFA_16_2   | 0.26 | -0.26 ( -0.56 - 0.03 )  | 0.72 | 0.13 ( -0.17 - 0.43 )   |
| NEFA_17_2   | 0.13 | -0.36 ( -0.65 - -0.07 ) | 0.87 | -0.05 ( -0.35 - 0.25 )  |
| NEFA_18_2   | 0.41 | -0.19 ( -0.48 - 0.1 )   | 0.65 | 0.17 ( -0.13 - 0.46 )   |
| NEFA_18_3   | 0.23 | -0.29 ( -0.58 - 0.01 )  | 0.76 | 0.1 ( -0.2 - 0.39 )     |
| NEFA_20_2   | 0.72 | -0.09 ( -0.38 - 0.2 )   | 0.55 | 0.2 ( -0.1 - 0.5 )      |
| NEFA_20_3   | 0.55 | -0.14 ( -0.43 - 0.15 )  | 0.77 | 0.09 ( -0.21 - 0.38 )   |
| NEFA_20_4   | 0.27 | -0.25 ( -0.54 - 0.04 )  | 0.96 | 0.02 ( -0.27 - 0.32 )   |
| NEFA_20_5   | 0.08 | -0.4 ( -0.69 - -0.12 )  | 0.58 | -0.2 ( -0.5 - 0.11 )    |
| NEFA_22_3   | 0.74 | 0.08 ( -0.21 - 0.37 )   | 0.54 | 0.2 ( -0.09 - 0.5 )     |
| NEFA_22_4   | 0.47 | -0.17 ( -0.46 - 0.12 )  | 0.85 | 0.06 ( -0.24 - 0.36 )   |
| NEFA_22_5   | 0.45 | -0.18 ( -0.47 - 0.11 )  | 1.00 | 0 ( -0.3 - 0.3 )        |
| NEFA_22_6   | 0.27 | -0.25 ( -0.54 - 0.04 )  | 0.92 | 0.03 ( -0.27 - 0.33 )   |
| NEFA_24_2   | 0.81 | -0.06 ( -0.35 - 0.24 )  | 0.40 | 0.36 ( 0.06 - 0.66 )    |
| NEFA_24_4   | 0.53 | 0.14 ( -0.14 - 0.43 )   | 0.51 | 0.28 ( -0.02 - 0.58 )   |
| NEFA_24_5   | 0.89 | -0.03 ( -0.32 - 0.26 )  | 0.54 | 0.21 ( -0.09 - 0.51 )   |
| NEFA_26_2   | 0.98 | 0 ( -0.29 - 0.28 )      | 0.53 | 0.24 ( -0.06 - 0.54 )   |
| PC.aa.C30.0 | 0.10 | -0.39 ( -0.68 - -0.09 ) | 0.95 | -0.03 ( -0.33 - 0.28 )  |
| PC.aa.C32.0 | 0.30 | -0.25 ( -0.54 - 0.05 )  | 0.73 | -0.12 ( -0.42 - 0.18 )  |
| PC.aa.C36.0 | 0.60 | -0.12 ( -0.41 - 0.17 )  | 0.90 | -0.04 ( -0.35 - 0.27 )  |
| PC.aa.C38.0 | 0.30 | -0.24 ( -0.54 - 0.06 )  | 0.72 | -0.14 ( -0.44 - 0.16 )  |
| PC.aa.C40.0 | 0.39 | -0.2 ( -0.49 - 0.09 )   | 0.54 | -0.22 ( -0.51 - 0.08 )  |
| PC.aa.C42.0 | 0.26 | -0.27 ( -0.56 - 0.02 )  | 0.54 | -0.21 ( -0.52 - 0.1 )   |
| PC.aa.C32.1 | 0.26 | -0.27 ( -0.57 - 0.03 )  | 0.98 | 0.01 ( -0.29 - 0.3 )    |
| PC.aa.C34.1 | 0.56 | -0.14 ( -0.43 - 0.16 )  | 0.87 | 0.05 ( -0.25 - 0.35 )   |
| PC.aa.C36.1 | 0.42 | -0.19 ( -0.48 - 0.11 )  | 0.84 | 0.07 ( -0.23 - 0.37 )   |
| PC.aa.C40.1 | 0.34 | -0.22 ( -0.51 - 0.07 )  | 0.45 | -0.3 ( -0.6 - 0 )       |
| PC.aa.C30.3 | 0.26 | -0.26 ( -0.56 - 0.03 )  | 0.76 | -0.1 ( -0.4 - 0.2 )     |
| PC.aa.C32.2 | 0.97 | -0.01 ( -0.3 - 0.28 )   | 0.40 | -0.36 ( -0.67 - -0.06 ) |
| PC.aa.C32.3 | 0.74 | -0.08 ( -0.37 - 0.21 )  | 0.72 | 0.13 ( -0.17 - 0.42 )   |
| PC.aa.C34.2 | 0.60 | -0.12 ( -0.41 - 0.18 )  | 0.76 | 0.11 ( -0.19 - 0.41 )   |
| PC.aa.C34.3 | 0.27 | -0.26 ( -0.55 - 0.04 )  | 0.90 | 0.04 ( -0.26 - 0.33 )   |
| PC.aa.C34.4 | 0.31 | -0.23 ( -0.52 - 0.06 )  | 0.96 | 0.02 ( -0.28 - 0.32 )   |
| PC.aa.C34.5 | 0.06 | -0.45 ( -0.75 - -0.16 ) | 0.83 | -0.08 ( -0.37 - 0.22 )  |
| PC.aa.C36.2 | 0.74 | -0.08 ( -0.38 - 0.21 )  | 0.63 | 0.18 ( -0.12 - 0.48 )   |
| PC.aa.C36.3 | 0.51 | -0.15 ( -0.45 - 0.14 )  | 0.96 | 0.02 ( -0.28 - 0.32 )   |
| PC.aa.C36.4 | 0.34 | -0.22 ( -0.51 - 0.07 )  | 0.84 | -0.06 ( -0.37 - 0.24 )  |
| PC.aa.C36.5 | 0.07 | -0.43 ( -0.72 - -0.14 ) | 0.76 | -0.11 ( -0.41 - 0.19 )  |

|              |      |                         |      |                         |
|--------------|------|-------------------------|------|-------------------------|
| PC.aa.C36.6  | 0.31 | -0.23 ( -0.52 - 0.06 )  | 0.87 | -0.05 ( -0.35 - 0.25 )  |
| PC.aa.C38.2  | 0.30 | -0.24 ( -0.53 - 0.05 )  | 0.70 | -0.15 ( -0.45 - 0.15 )  |
| PC.aa.C38.3  | 0.53 | -0.15 ( -0.44 - 0.15 )  | 0.97 | 0.01 ( -0.29 - 0.31 )   |
| PC.aa.C38.4  | 0.42 | -0.19 ( -0.48 - 0.1 )   | 0.84 | -0.07 ( -0.38 - 0.24 )  |
| PC.aa.C38.5  | 0.47 | -0.17 ( -0.46 - 0.13 )  | 0.84 | -0.06 ( -0.36 - 0.23 )  |
| PC.aa.C38.6  | 0.21 | -0.29 ( -0.58 - 0 )     | 0.53 | -0.24 ( -0.55 - 0.06 )  |
| PC.aa.C40.2  | 0.28 | -0.25 ( -0.54 - 0.04 )  | 0.40 | -0.37 ( -0.67 - -0.08 ) |
| PC.aa.C40.3  | 0.24 | -0.28 ( -0.57 - 0.01 )  | 0.40 | -0.33 ( -0.63 - -0.04 ) |
| PC.aa.C40.4  | 0.72 | -0.09 ( -0.38 - 0.2 )   | 0.76 | -0.11 ( -0.41 - 0.19 )  |
| PC.aa.C40.5  | 0.44 | -0.18 ( -0.47 - 0.11 )  | 0.65 | -0.17 ( -0.47 - 0.13 )  |
| PC.aa.C40.6  | 0.30 | -0.24 ( -0.52 - 0.05 )  | 0.62 | -0.19 ( -0.49 - 0.12 )  |
| PC.aa.C42.5  | 0.21 | -0.29 ( -0.58 - 0 )     | 0.54 | -0.22 ( -0.52 - 0.08 )  |
| PC.aa.C43.6  | 0.82 | -0.05 ( -0.35 - 0.24 )  | 0.96 | 0.01 ( -0.29 - 0.32 )   |
| PC.aa.C44.12 | 0.21 | -0.31 ( -0.6 - -0.01 )  | 0.72 | -0.14 ( -0.45 - 0.16 )  |
| PC.ae.C30.0  | 0.33 | -0.22 ( -0.51 - 0.07 )  | 0.51 | -0.26 ( -0.56 - 0.04 )  |
| PC.ae.C32.0  | 0.42 | -0.19 ( -0.48 - 0.1 )   | 0.65 | -0.16 ( -0.46 - 0.13 )  |
| PC.ae.C34.0  | 0.06 | -0.49 ( -0.78 - -0.19 ) | 0.42 | -0.32 ( -0.62 - -0.02 ) |
| PC.ae.C36.0  | 0.81 | -0.06 ( -0.36 - 0.24 )  | 0.87 | -0.05 ( -0.35 - 0.25 )  |
| PC.ae.C38.0  | 0.17 | -0.33 ( -0.62 - -0.04 ) | 0.51 | -0.27 ( -0.57 - 0.03 )  |
| PC.ae.C40.0  | 0.18 | -0.32 ( -0.61 - -0.03 ) | 0.96 | -0.02 ( -0.32 - 0.28 )  |
| PC.ae.C32.1  | 0.47 | -0.17 ( -0.46 - 0.13 )  | 0.85 | -0.06 ( -0.36 - 0.24 )  |
| PC.ae.C34.1  | 0.21 | -0.3 ( -0.6 - -0.01 )   | 0.76 | -0.1 ( -0.4 - 0.2 )     |
| PC.ae.C36.1  | 0.21 | -0.29 ( -0.59 - 0 )     | 0.42 | -0.32 ( -0.62 - -0.02 ) |
| PC.ae.C40.1  | 0.82 | -0.05 ( -0.35 - 0.25 )  | 0.83 | -0.07 ( -0.37 - 0.23 )  |
| PC.ae.C42.1  | 0.82 | -0.05 ( -0.34 - 0.24 )  | 0.72 | -0.13 ( -0.44 - 0.18 )  |
| PC.ae.C32.2  | 0.06 | -0.44 ( -0.73 - -0.15 ) | 0.42 | -0.33 ( -0.62 - -0.03 ) |
| PC.ae.C34.2  | 0.26 | -0.26 ( -0.56 - 0.03 )  | 0.78 | -0.09 ( -0.39 - 0.21 )  |
| PC.ae.C34.3  | 0.20 | -0.31 ( -0.6 - -0.02 )  | 0.76 | -0.1 ( -0.4 - 0.2 )     |
| PC.ae.C34.4  | 0.06 | -0.44 ( -0.73 - -0.16 ) | 0.33 | -0.46 ( -0.76 - -0.16 ) |
| PC.ae.C36.2  | 0.13 | -0.35 ( -0.64 - -0.06 ) | 0.53 | -0.24 ( -0.53 - 0.06 )  |
| PC.ae.C36.3  | 0.55 | -0.14 ( -0.43 - 0.15 )  | 0.76 | -0.1 ( -0.39 - 0.2 )    |
| PC.ae.C36.4  | 0.30 | -0.24 ( -0.54 - 0.05 )  | 0.54 | -0.23 ( -0.53 - 0.07 )  |
| PC.ae.C36.5  | 0.45 | -0.18 ( -0.47 - 0.12 )  | 0.54 | -0.23 ( -0.53 - 0.08 )  |
| PC.ae.C38.2  | 0.10 | -0.38 ( -0.67 - -0.09 ) | 0.51 | -0.27 ( -0.57 - 0.02 )  |
| PC.ae.C38.3  | 0.13 | -0.36 ( -0.65 - -0.07 ) | 0.54 | -0.22 ( -0.52 - 0.08 )  |
| PC.ae.C38.4  | 0.31 | -0.23 ( -0.52 - 0.06 )  | 0.72 | -0.13 ( -0.43 - 0.17 )  |
| PC.ae.C38.5  | 0.45 | -0.18 ( -0.48 - 0.12 )  | 0.71 | -0.15 ( -0.45 - 0.16 )  |
| PC.ae.C38.6  | 0.30 | -0.24 ( -0.53 - 0.06 )  | 0.52 | -0.25 ( -0.55 - 0.05 )  |
| PC.ae.C40.2  | 0.73 | -0.08 ( -0.37 - 0.21 )  | 0.96 | -0.02 ( -0.32 - 0.28 )  |
| PC.ae.C40.3  | 0.15 | -0.34 ( -0.63 - -0.05 ) | 0.78 | -0.09 ( -0.39 - 0.21 )  |
| PC.ae.C40.4  | 0.06 | -0.43 ( -0.72 - -0.14 ) | 0.53 | -0.24 ( -0.53 - 0.06 )  |

|                 |      |                         |      |                         |
|-----------------|------|-------------------------|------|-------------------------|
| PC.ae.C40.5     | 0.15 | -0.34 ( -0.63 - -0.05 ) | 0.40 | -0.34 ( -0.64 - -0.04 ) |
| PC.ae.C40.6     | 0.08 | -0.41 ( -0.7 - -0.13 )  | 0.52 | -0.25 ( -0.55 - 0.05 )  |
| PC.ae.C42.3     | 0.47 | -0.16 ( -0.46 - 0.13 )  | 0.72 | -0.12 ( -0.42 - 0.17 )  |
| PC.ae.C42.4     | 0.30 | -0.24 ( -0.52 - 0.05 )  | 0.65 | -0.16 ( -0.46 - 0.13 )  |
| PC.ae.C42.5     | 0.52 | -0.15 ( -0.45 - 0.14 )  | 0.72 | -0.13 ( -0.43 - 0.17 )  |
| PC.ae.C42.6     | 0.08 | -0.4 ( -0.69 - -0.11 )  | 0.45 | -0.31 ( -0.61 - 0 )     |
| lyso.PC.a.C14.0 | 0.72 | -0.09 ( -0.38 - 0.2 )   | 0.86 | 0.06 ( -0.24 - 0.35 )   |
| lyso.PC.a.C16.0 | 0.47 | 0.17 ( -0.13 - 0.47 )   | 0.76 | 0.1 ( -0.21 - 0.4 )     |
| lyso.PC.a.C18.0 | 0.53 | 0.15 ( -0.15 - 0.44 )   | 0.84 | 0.07 ( -0.24 - 0.38 )   |
| lyso.PC.a.C16.1 | 0.92 | -0.02 ( -0.31 - 0.27 )  | 0.76 | 0.11 ( -0.19 - 0.41 )   |
| lyso.PC.a.C18.1 | 0.82 | -0.05 ( -0.35 - 0.25 )  | 0.87 | 0.05 ( -0.25 - 0.35 )   |
| lyso.PC.a.C18.2 | 0.97 | -0.01 ( -0.31 - 0.29 )  | 0.51 | 0.26 ( -0.04 - 0.57 )   |
| lyso.PC.a.C18.3 | 0.62 | 0.12 ( -0.18 - 0.41 )   | 0.53 | 0.23 ( -0.06 - 0.53 )   |
| lyso.PC.a.C20.3 | 0.93 | -0.02 ( -0.31 - 0.28 )  | 0.76 | 0.1 ( -0.2 - 0.4 )      |
| lyso.PC.a.C20.4 | 0.82 | -0.05 ( -0.34 - 0.24 )  | 0.76 | 0.1 ( -0.2 - 0.41 )     |
| lyso.PC.a.C20.5 | 0.20 | -0.31 ( -0.6 - -0.02 )  | 0.83 | -0.07 ( -0.37 - 0.23 )  |
| lyso.PC.a.C22.6 | 0.37 | -0.21 ( -0.5 - 0.09 )   | 0.54 | -0.21 ( -0.51 - 0.1 )   |
| lyso.PC.e.C16.0 | 0.47 | -0.16 ( -0.45 - 0.12 )  | 0.72 | -0.13 ( -0.43 - 0.16 )  |
| lyso.PC.e.C18.0 | 0.17 | -0.33 ( -0.61 - -0.04 ) | 0.54 | -0.21 ( -0.51 - 0.08 )  |
| lyso.PC.e.C18.1 | 0.48 | -0.16 ( -0.46 - 0.13 )  | 0.97 | -0.01 ( -0.3 - 0.28 )   |
| SM.a.C30.1      | 0.23 | -0.28 ( -0.57 - 0.01 )  | 0.71 | -0.14 ( -0.44 - 0.16 )  |
| SM.a.C32.1      | 0.08 | -0.4 ( -0.69 - -0.11 )  | 0.59 | -0.19 ( -0.48 - 0.11 )  |
| SM.a.C33.1      | 0.08 | -0.4 ( -0.69 - -0.11 )  | 0.45 | -0.3 ( -0.59 - 0 )      |
| SM.a.C34.1      | 0.33 | -0.23 ( -0.52 - 0.07 )  | 0.65 | -0.17 ( -0.47 - 0.13 )  |
| SM.a.C35.1      | 0.55 | -0.14 ( -0.43 - 0.15 )  | 0.78 | -0.09 ( -0.39 - 0.21 )  |
| SM.a.C36.1      | 0.46 | -0.17 ( -0.46 - 0.12 )  | 0.87 | -0.05 ( -0.35 - 0.25 )  |
| SM.a.C37.1      | 0.20 | -0.31 ( -0.61 - -0.02 ) | 0.72 | -0.12 ( -0.42 - 0.17 )  |
| SM.a.C39.1      | 0.13 | -0.36 ( -0.64 - -0.07 ) | 0.72 | -0.13 ( -0.43 - 0.17 )  |
| SM.a.C41.1      | 0.06 | -0.44 ( -0.73 - -0.15 ) | 0.54 | -0.23 ( -0.53 - 0.07 )  |
| SM.a.C42.1      | 0.57 | -0.13 ( -0.42 - 0.16 )  | 0.75 | -0.12 ( -0.42 - 0.18 )  |
| SM.a.C43.1      | 0.06 | -0.43 ( -0.72 - -0.15 ) | 0.54 | -0.22 ( -0.51 - 0.08 )  |
| SM.a.C32.2      | 0.18 | -0.33 ( -0.62 - -0.03 ) | 0.75 | -0.12 ( -0.43 - 0.19 )  |
| SM.a.C34.2      | 0.43 | -0.18 ( -0.47 - 0.11 )  | 0.77 | -0.09 ( -0.39 - 0.21 )  |
| SM.a.C36.2      | 0.43 | -0.18 ( -0.48 - 0.11 )  | 0.97 | 0.01 ( -0.29 - 0.31 )   |
| SM.a.C36.3      | 0.74 | -0.08 ( -0.37 - 0.21 )  | 0.84 | -0.06 ( -0.36 - 0.23 )  |
| SM.a.C38.2      | 0.47 | -0.17 ( -0.46 - 0.13 )  | 0.78 | -0.09 ( -0.4 - 0.22 )   |
| SM.a.C38.3      | 0.72 | -0.09 ( -0.38 - 0.2 )   | 0.99 | 0 ( -0.31 - 0.3 )       |
| SM.a.C39.2      | 0.01 | -0.6 ( -0.9 - -0.31 )   | 0.88 | -0.05 ( -0.34 - 0.25 )  |
| SM.a.C40.2      | 0.37 | -0.21 ( -0.5 - 0.09 )   | 0.72 | -0.13 ( -0.44 - 0.18 )  |
| SM.a.C40.5      | 0.30 | -0.24 ( -0.53 - 0.05 )  | 0.65 | -0.18 ( -0.49 - 0.13 )  |
| SM.a.C41.2      | 0.27 | -0.26 ( -0.55 - 0.03 )  | 0.57 | -0.19 ( -0.49 - 0.1 )   |



|                  |      |                         |      |                        |
|------------------|------|-------------------------|------|------------------------|
| SM.a.C42.2       | 0.36 | -0.21 ( -0.51 - 0.08 )  | 0.67 | -0.16 ( -0.46 - 0.14 ) |
| SM.a.C42.3       | 0.63 | -0.11 ( -0.4 - 0.18 )   | 0.76 | -0.1 ( -0.4 - 0.2 )    |
| SM.a.C42.4       | 0.37 | -0.21 ( -0.5 - 0.09 )   | 0.76 | -0.1 ( -0.4 - 0.2 )    |
| SM.a.C42.6       | 0.26 | -0.27 ( -0.56 - 0.02 )  | 0.54 | -0.22 ( -0.53 - 0.08 ) |
| SM.a.C43.2       | 0.13 | -0.35 ( -0.64 - -0.07 ) | 0.87 | -0.05 ( -0.36 - 0.25 ) |
| SM.a.C44.6       | 0.18 | -0.32 ( -0.61 - -0.03 ) | 0.63 | -0.18 ( -0.48 - 0.13 ) |
| SM.e.C36.2       | 0.39 | -0.2 ( -0.49 - 0.09 )   | 0.72 | -0.12 ( -0.42 - 0.18 ) |
| SM.e.C38.3       | 0.26 | -0.26 ( -0.55 - 0.03 )  | 0.89 | -0.04 ( -0.34 - 0.26 ) |
| SM.e.C40.5       | 0.73 | -0.09 ( -0.38 - 0.21 )  | 0.72 | -0.13 ( -0.43 - 0.18 ) |
| Carn.a.C2.0      | 0.54 | 0.14 ( -0.15 - 0.43 )   | 0.40 | 0.38 ( 0.08 - 0.67 )   |
| Carn.a.C3.0      | 0.81 | 0.06 ( -0.23 - 0.35 )   | 0.70 | 0.15 ( -0.15 - 0.44 )  |
| Carn.a.C3.0.DC   | 0.86 | -0.04 ( -0.33 - 0.25 )  | 0.76 | 0.11 ( -0.19 - 0.41 )  |
| Carn.a.C4.0      | 0.76 | -0.07 ( -0.37 - 0.22 )  | 0.72 | 0.14 ( -0.16 - 0.44 )  |
| Carn.a.C5.0      | 0.56 | 0.14 ( -0.16 - 0.43 )   | 0.97 | 0.01 ( -0.29 - 0.32 )  |
| Carn.a.C6.0      | 0.79 | 0.07 ( -0.23 - 0.36 )   | 0.40 | 0.34 ( 0.04 - 0.64 )   |
| Carn.a.C6.0.OH   | 0.77 | 0.07 ( -0.22 - 0.36 )   | 0.76 | 0.1 ( -0.2 - 0.4 )     |
| Carn.a.C8.0      | 0.71 | -0.1 ( -0.39 - 0.2 )    | 0.83 | 0.07 ( -0.22 - 0.37 )  |
| Carn.a.C8.1      | 0.81 | -0.06 ( -0.35 - 0.23 )  | 0.76 | -0.11 ( -0.41 - 0.19 ) |
| Carn.a.C9.0      | 0.81 | 0.06 ( -0.23 - 0.36 )   | 0.72 | 0.14 ( -0.17 - 0.44 )  |
| Carn.a.C10.0     | 0.42 | -0.19 ( -0.48 - 0.1 )   | 0.82 | 0.08 ( -0.22 - 0.38 )  |
| Carn.a.C10.1     | 0.72 | 0.09 ( -0.2 - 0.38 )    | 0.54 | 0.21 ( -0.09 - 0.51 )  |
| Carn.a.C12.0     | 0.92 | -0.02 ( -0.31 - 0.27 )  | 0.76 | 0.11 ( -0.19 - 0.42 )  |
| Carn.a.C14.1     | 0.88 | -0.03 ( -0.32 - 0.26 )  | 0.83 | 0.08 ( -0.23 - 0.38 )  |
| Carn.a.C14.2     | 0.57 | 0.13 ( -0.16 - 0.42 )   | 0.54 | 0.24 ( -0.07 - 0.54 )  |
| Carn.a.C15.0     | 0.81 | 0.06 ( -0.23 - 0.35 )   | 0.59 | 0.19 ( -0.11 - 0.5 )   |
| Carn.a.C16.0     | 0.26 | 0.27 ( -0.02 - 0.57 )   | 0.83 | 0.07 ( -0.23 - 0.38 )  |
| Carn.a.C16.0.Oxo | 0.87 | 0.03 ( -0.26 - 0.33 )   | 0.97 | 0.01 ( -0.29 - 0.31 )  |
| Carn.a.C16.1     | 0.47 | 0.17 ( -0.13 - 0.46 )   | 0.54 | 0.21 ( -0.1 - 0.51 )   |
| Carn.a.C16.2     | 0.73 | 0.09 ( -0.2 - 0.38 )    | 0.96 | 0.02 ( -0.29 - 0.33 )  |
| Carn.a.C18.0     | 0.74 | 0.08 ( -0.21 - 0.37 )   | 0.78 | 0.09 ( -0.21 - 0.38 )  |
| Carn.a.C18.1     | 0.48 | 0.16 ( -0.13 - 0.45 )   | 0.96 | 0.02 ( -0.29 - 0.32 )  |
| Carn.a.C18.2     | 0.06 | 0.48 ( 0.19 - 0.77 )    | 0.51 | 0.28 ( -0.02 - 0.59 )  |
| Carn.a.C18.2.OH  | 0.75 | 0.08 ( -0.22 - 0.37 )   | 0.96 | 0.02 ( -0.29 - 0.32 )  |
| Carn.a.C20.0     | 0.82 | 0.05 ( -0.24 - 0.34 )   | 0.76 | 0.1 ( -0.2 - 0.4 )     |
| Carn.a.C20.1     | 0.61 | 0.12 ( -0.18 - 0.41 )   | 0.59 | 0.19 ( -0.11 - 0.49 )  |
| Carn.a.C20.3     | 0.57 | 0.13 ( -0.16 - 0.42 )   | 0.84 | 0.07 ( -0.24 - 0.37 )  |
| Carn.a.C20.4     | 0.69 | 0.1 ( -0.19 - 0.39 )    | 0.59 | 0.19 ( -0.11 - 0.5 )   |
| BCAA             | 0.81 | 0.06 ( -0.23 - 0.35 )   | 0.51 | 0.27 ( -0.03 - 0.58 )  |
| AAA              | 0.86 | -0.04 ( -0.33 - 0.26 )  | 0.69 | 0.16 ( -0.15 - 0.46 )  |
| EAA              | 0.88 | 0.03 ( -0.26 - 0.32 )   | 0.51 | 0.26 ( -0.04 - 0.56 )  |
| NEAA             | 0.59 | 0.12 ( -0.17 - 0.42 )   | 0.40 | 0.34 ( 0.04 - 0.65 )   |

|                                                                                                                                                                                                                                                                                                                                                                                                                                                                                                                                        |      |                         |      |                        |
|----------------------------------------------------------------------------------------------------------------------------------------------------------------------------------------------------------------------------------------------------------------------------------------------------------------------------------------------------------------------------------------------------------------------------------------------------------------------------------------------------------------------------------------|------|-------------------------|------|------------------------|
| AA                                                                                                                                                                                                                                                                                                                                                                                                                                                                                                                                     | 0.73 | 0.09 ( -0.21 - 0.38 )   | 0.42 | 0.32 ( 0.02 - 0.63 )   |
| SATURATEDNEFA                                                                                                                                                                                                                                                                                                                                                                                                                                                                                                                          | 0.60 | -0.12 ( -0.41 - 0.17 )  | 0.54 | 0.21 ( -0.09 - 0.51 )  |
| MONOUNSATNEFA                                                                                                                                                                                                                                                                                                                                                                                                                                                                                                                          | 0.21 | -0.3 ( -0.59 - 0 )      | 0.84 | 0.06 ( -0.24 - 0.36 )  |
| POLYUNSATNEFA                                                                                                                                                                                                                                                                                                                                                                                                                                                                                                                          | 0.33 | -0.23 ( -0.52 - 0.06 )  | 0.72 | 0.14 ( -0.16 - 0.43 )  |
| NEFA                                                                                                                                                                                                                                                                                                                                                                                                                                                                                                                                   | 0.37 | -0.21 ( -0.5 - 0.09 )   | 0.70 | 0.15 ( -0.15 - 0.45 )  |
| SATURATEDPCaa                                                                                                                                                                                                                                                                                                                                                                                                                                                                                                                          | 0.21 | -0.3 ( -0.59 - 0 )      | 0.72 | -0.13 ( -0.43 - 0.18 ) |
| MONOUNSATPCaa                                                                                                                                                                                                                                                                                                                                                                                                                                                                                                                          | 0.48 | -0.16 ( -0.46 - 0.13 )  | 0.87 | 0.05 ( -0.25 - 0.35 )  |
| POLYUNSATPCaa                                                                                                                                                                                                                                                                                                                                                                                                                                                                                                                          | 0.33 | -0.22 ( -0.52 - 0.07 )  | 0.87 | -0.05 ( -0.35 - 0.25 ) |
| PCaa                                                                                                                                                                                                                                                                                                                                                                                                                                                                                                                                   | 0.34 | -0.22 ( -0.51 - 0.07 )  | 0.91 | -0.04 ( -0.34 - 0.27 ) |
| SATURATEDPCae                                                                                                                                                                                                                                                                                                                                                                                                                                                                                                                          | 0.14 | -0.35 ( -0.64 - -0.06 ) | 0.75 | -0.12 ( -0.42 - 0.18 ) |
| MONOUNSATPCae                                                                                                                                                                                                                                                                                                                                                                                                                                                                                                                          | 0.26 | -0.27 ( -0.57 - 0.02 )  | 0.66 | -0.16 ( -0.46 - 0.14 ) |
| POLYUNSATPCae                                                                                                                                                                                                                                                                                                                                                                                                                                                                                                                          | 0.21 | -0.3 ( -0.59 - 0 )      | 0.54 | -0.23 ( -0.53 - 0.07 ) |
| PCae                                                                                                                                                                                                                                                                                                                                                                                                                                                                                                                                   | 0.20 | -0.31 ( -0.61 - -0.02 ) | 0.54 | -0.21 ( -0.51 - 0.09 ) |
| SATURATEDLYSOPCa                                                                                                                                                                                                                                                                                                                                                                                                                                                                                                                       | 0.50 | 0.16 ( -0.14 - 0.45 )   | 0.77 | 0.09 ( -0.21 - 0.4 )   |
| MONOUNSATLYSOPCa                                                                                                                                                                                                                                                                                                                                                                                                                                                                                                                       | 0.86 | -0.04 ( -0.33 - 0.26 )  | 0.84 | 0.07 ( -0.23 - 0.37 )  |
| POLYUNSATLYSOPCa                                                                                                                                                                                                                                                                                                                                                                                                                                                                                                                       | 0.82 | -0.05 ( -0.34 - 0.25 )  | 0.70 | 0.15 ( -0.15 - 0.46 )  |
| LYSOPCa                                                                                                                                                                                                                                                                                                                                                                                                                                                                                                                                | 0.74 | 0.08 ( -0.21 - 0.38 )   | 0.76 | 0.11 ( -0.19 - 0.42 )  |
| SATURATEDLYSOPCe                                                                                                                                                                                                                                                                                                                                                                                                                                                                                                                       | 0.21 | -0.3 ( -0.58 - -0.01 )  | 0.54 | -0.21 ( -0.5 - 0.09 )  |
| lyso.PC.e.C18.1                                                                                                                                                                                                                                                                                                                                                                                                                                                                                                                        | 0.48 | -0.16 ( -0.46 - 0.13 )  | 0.97 | -0.01 ( -0.3 - 0.28 )  |
| LYSOPCe                                                                                                                                                                                                                                                                                                                                                                                                                                                                                                                                | 0.21 | -0.29 ( -0.58 - 0 )     | 0.59 | -0.18 ( -0.48 - 0.11 ) |
| MONOUNSATSM                                                                                                                                                                                                                                                                                                                                                                                                                                                                                                                            | 0.30 | -0.24 ( -0.54 - 0.05 )  | 0.69 | -0.15 ( -0.45 - 0.14 ) |
| POLYUNSATSM                                                                                                                                                                                                                                                                                                                                                                                                                                                                                                                            | 0.34 | -0.22 ( -0.51 - 0.07 )  | 0.72 | -0.13 ( -0.43 - 0.18 ) |
| SM                                                                                                                                                                                                                                                                                                                                                                                                                                                                                                                                     | 0.31 | -0.23 ( -0.53 - 0.06 )  | 0.71 | -0.14 ( -0.44 - 0.16 ) |
| Carn                                                                                                                                                                                                                                                                                                                                                                                                                                                                                                                                   | 0.26 | 0.26 ( -0.03 - 0.56 )   | 0.40 | 0.38 ( 0.1 - 0.67 )    |
| SHORTCHAINCARNa                                                                                                                                                                                                                                                                                                                                                                                                                                                                                                                        | 0.57 | 0.13 ( -0.16 - 0.42 )   | 0.40 | 0.35 ( 0.06 - 0.65 )   |
| MEDIUMCHAINCARNa                                                                                                                                                                                                                                                                                                                                                                                                                                                                                                                       | 0.87 | -0.03 ( -0.33 - 0.26 )  | 0.71 | 0.14 ( -0.16 - 0.45 )  |
| LONGCHAINCARNa                                                                                                                                                                                                                                                                                                                                                                                                                                                                                                                         | 0.39 | 0.2 ( -0.09 - 0.5 )     | 0.72 | 0.14 ( -0.16 - 0.45 )  |
| ACYLCARN                                                                                                                                                                                                                                                                                                                                                                                                                                                                                                                               | 0.56 | 0.13 ( -0.16 - 0.43 )   | 0.40 | 0.33 ( 0.04 - 0.63 )   |
| Values represent absolute differences in SRS score and corresponding p-values from linear regression models that reflect the difference in SRS score at age 6 and 13 per SDS increase in cord-blood metabolite concentrations (µmol/L). Model includes sex and age at outcome. AA amino acids, NEFA non-esterified fatty acids, PC.aa diacyl-phosphatidylcholines, PC.ae acyl-alkyl-phosphatidylcholines, lyso.PC.a. acyl-lysophosphatidylcholines, lyso.PC.e alkyl-lysophosphatidylcholines, Carn.a acylcarnitines, SM sphingomyelins |      |                         |      |                        |

**Supplemental Table S4.** Associations of cord-blood individual metabolites and metabolite groups with SRS scores at age 6 and 13. Main model.

|            | Differences in SRS score age 6<br>N = 716 |                            | Differences in SRS score age 13<br>N = 648 |                            |
|------------|-------------------------------------------|----------------------------|--------------------------------------------|----------------------------|
| Metabolite | P-value                                   | Estimate<br>(95%-Interval) | P-value                                    | Estimate<br>(95%-Interval) |
| Ala        | 1.00                                      | -0.01 ( -0.3 - 0.29 )      | 0.75                                       | 0.25 ( -0.05 - 0.55 )      |
| Arg        | 0.45                                      | -0.23 ( -0.52 - 0.06 )     | 0.99                                       | 0.03 ( -0.28 - 0.33 )      |
| Asn        | 0.88                                      | 0.03 ( -0.26 - 0.32 )      | 0.75                                       | 0.27 ( -0.02 - 0.57 )      |
| Asp        | 0.44                                      | 0.24 ( -0.05 - 0.53 )      | 0.75                                       | 0.28 ( -0.02 - 0.59 )      |
| Cit        | 0.62                                      | 0.13 ( -0.16 - 0.43 )      | 0.82                                       | 0.18 ( -0.12 - 0.48 )      |
| Gln        | 0.81                                      | 0.07 ( -0.22 - 0.36 )      | 0.89                                       | 0.13 ( -0.17 - 0.44 )      |
| Glu        | 0.50                                      | 0.2 ( -0.09 - 0.49 )       | 0.82                                       | 0.21 ( -0.09 - 0.51 )      |
| Gly        | 0.62                                      | 0.13 ( -0.16 - 0.42 )      | 0.82                                       | 0.2 ( -0.1 - 0.5 )         |
| His        | 0.77                                      | -0.08 ( -0.37 - 0.22 )     | 0.89                                       | 0.1 ( -0.2 - 0.39 )        |
| Ile        | 0.77                                      | 0.08 ( -0.22 - 0.37 )      | 0.82                                       | 0.19 ( -0.11 - 0.49 )      |
| Leu        | 0.86                                      | 0.04 ( -0.25 - 0.33 )      | 0.82                                       | 0.21 ( -0.1 - 0.51 )       |
| Lys        | 0.88                                      | 0.03 ( -0.26 - 0.32 )      | 0.99                                       | -0.02 ( -0.33 - 0.29 )     |
| Met        | 0.98                                      | 0 ( -0.29 - 0.29 )         | 0.75                                       | 0.26 ( -0.04 - 0.57 )      |
| Orn        | 0.33                                      | 0.31 ( 0.02 - 0.6 )        | 0.75                                       | 0.25 ( -0.05 - 0.56 )      |
| Phe        | 0.91                                      | 0.03 ( -0.26 - 0.32 )      | 0.89                                       | 0.12 ( -0.18 - 0.43 )      |
| Pro        | 0.54                                      | 0.17 ( -0.12 - 0.45 )      | 0.82                                       | 0.2 ( -0.1 - 0.51 )        |
| Trp        | 0.62                                      | -0.13 ( -0.42 - 0.16 )     | 0.98                                       | 0.04 ( -0.26 - 0.34 )      |
| Ser        | 0.45                                      | 0.24 ( -0.05 - 0.53 )      | 0.82                                       | 0.2 ( -0.1 - 0.51 )        |
| Thr        | 0.86                                      | -0.05 ( -0.34 - 0.24 )     | 0.82                                       | 0.23 ( -0.07 - 0.53 )      |
| Tyr        | 0.97                                      | 0.01 ( -0.28 - 0.31 )      | 0.89                                       | 0.13 ( -0.18 - 0.44 )      |
| Val        | 0.97                                      | 0.01 ( -0.28 - 0.31 )      | 0.82                                       | 0.2 ( -0.11 - 0.5 )        |
| Cys        | 0.97                                      | 0.01 ( -0.28 - 0.3 )       | 1.00                                       | 0 ( -0.31 - 0.3 )          |
| NEFA_14_0  | 0.24                                      | -0.36 ( -0.64 - -0.07 )    | 0.94                                       | 0.07 ( -0.23 - 0.36 )      |
| NEFA_15_0  | 0.18                                      | -0.39 ( -0.68 - -0.1 )     | 1.00                                       | 0 ( -0.29 - 0.3 )          |
| NEFA_16_0  | 0.76                                      | -0.08 ( -0.37 - 0.21 )     | 0.82                                       | 0.23 ( -0.08 - 0.53 )      |
| NEFA_17_0  | 0.52                                      | -0.19 ( -0.48 - 0.1 )      | 0.89                                       | 0.14 ( -0.16 - 0.44 )      |
| NEFA_18_0  | 0.82                                      | 0.06 ( -0.23 - 0.35 )      | 0.75                                       | 0.29 ( -0.01 - 0.59 )      |
| NEFA_24_0  | 0.75                                      | -0.09 ( -0.37 - 0.2 )      | 0.75                                       | 0.25 ( -0.04 - 0.55 )      |
| NEFA_26_0  | 0.45                                      | -0.23 ( -0.53 - 0.06 )     | 0.82                                       | 0.18 ( -0.12 - 0.48 )      |
| NEFA_14_1  | 0.18                                      | -0.4 ( -0.69 - -0.1 )      | 0.99                                       | -0.01 ( -0.32 - 0.29 )     |
| NEFA_16_1  | 0.38                                      | -0.29 ( -0.58 - 0 )        | 0.99                                       | 0.02 ( -0.28 - 0.33 )      |
| NEFA_17_1  | 0.28                                      | -0.33 ( -0.62 - -0.04 )    | 0.99                                       | 0.01 ( -0.29 - 0.31 )      |
| NEFA_18_1  | 0.41                                      | -0.26 ( -0.55 - 0.03 )     | 0.89                                       | 0.09 ( -0.21 - 0.39 )      |
| NEFA_19_1  | 0.24                                      | -0.36 ( -0.65 - -0.07 )    | 0.94                                       | 0.07 ( -0.23 - 0.37 )      |
| NEFA_20_1  | 0.62                                      | -0.14 ( -0.43 - 0.15 )     | 0.89                                       | 0.11 ( -0.19 - 0.41 )      |

|             |      |                         |      |                         |
|-------------|------|-------------------------|------|-------------------------|
| NEFA_24_1   | 0.62 | -0.13 ( -0.41 - 0.16 )  | 0.82 | 0.23 ( -0.06 - 0.53 )   |
| NEFA_26_1   | 0.52 | -0.19 ( -0.48 - 0.1 )   | 0.87 | 0.17 ( -0.13 - 0.47 )   |
| NEFA_16_2   | 0.42 | -0.26 ( -0.55 - 0.03 )  | 0.89 | 0.12 ( -0.18 - 0.42 )   |
| NEFA_17_2   | 0.36 | -0.3 ( -0.59 - -0.01 )  | 0.95 | -0.05 ( -0.35 - 0.25 )  |
| NEFA_18_2   | 0.53 | -0.18 ( -0.47 - 0.11 )  | 0.87 | 0.16 ( -0.14 - 0.46 )   |
| NEFA_18_3   | 0.38 | -0.28 ( -0.57 - 0.01 )  | 0.89 | 0.1 ( -0.2 - 0.39 )     |
| NEFA_20_2   | 0.84 | -0.05 ( -0.35 - 0.24 )  | 0.82 | 0.2 ( -0.1 - 0.49 )     |
| NEFA_20_3   | 0.64 | -0.12 ( -0.4 - 0.17 )   | 0.93 | 0.07 ( -0.22 - 0.36 )   |
| NEFA_20_4   | 0.43 | -0.24 ( -0.53 - 0.04 )  | 0.99 | 0.02 ( -0.28 - 0.31 )   |
| NEFA_20_5   | 0.28 | -0.34 ( -0.63 - -0.05 ) | 0.82 | -0.21 ( -0.52 - 0.09 )  |
| NEFA_22_3   | 0.97 | 0.01 ( -0.28 - 0.3 )    | 0.82 | 0.18 ( -0.11 - 0.47 )   |
| NEFA_22_4   | 0.58 | -0.15 ( -0.44 - 0.14 )  | 0.89 | 0.11 ( -0.2 - 0.41 )    |
| NEFA_22_5   | 0.62 | -0.13 ( -0.42 - 0.16 )  | 0.99 | 0.03 ( -0.27 - 0.33 )   |
| NEFA_22_6   | 0.53 | -0.17 ( -0.47 - 0.12 )  | 0.95 | 0.05 ( -0.25 - 0.35 )   |
| NEFA_24_2   | 0.81 | -0.06 ( -0.35 - 0.23 )  | 0.69 | 0.35 ( 0.06 - 0.65 )    |
| NEFA_24_4   | 0.62 | 0.14 ( -0.15 - 0.43 )   | 0.75 | 0.29 ( -0.01 - 0.59 )   |
| NEFA_24_5   | 0.96 | -0.01 ( -0.3 - 0.27 )   | 0.82 | 0.21 ( -0.09 - 0.51 )   |
| NEFA_26_2   | 0.85 | -0.05 ( -0.33 - 0.24 )  | 0.82 | 0.23 ( -0.07 - 0.54 )   |
| PC.aa.C30.0 | 0.18 | -0.41 ( -0.71 - -0.11 ) | 0.94 | -0.06 ( -0.37 - 0.25 )  |
| PC.aa.C32.0 | 0.40 | -0.28 ( -0.58 - 0.02 )  | 0.87 | -0.16 ( -0.47 - 0.15 )  |
| PC.aa.C36.0 | 0.83 | -0.06 ( -0.34 - 0.23 )  | 0.99 | 0.01 ( -0.3 - 0.31 )    |
| PC.aa.C38.0 | 0.67 | -0.12 ( -0.42 - 0.18 )  | 0.89 | -0.1 ( -0.4 - 0.2 )     |
| PC.aa.C40.0 | 0.75 | -0.09 ( -0.38 - 0.2 )   | 0.89 | -0.14 ( -0.44 - 0.16 )  |
| PC.aa.C42.0 | 0.62 | -0.14 ( -0.44 - 0.16 )  | 0.89 | -0.12 ( -0.44 - 0.2 )   |
| PC.aa.C32.1 | 0.33 | -0.33 ( -0.63 - -0.03 ) | 0.98 | -0.04 ( -0.34 - 0.26 )  |
| PC.aa.C34.1 | 0.57 | -0.16 ( -0.46 - 0.14 )  | 0.99 | 0.01 ( -0.29 - 0.31 )   |
| PC.aa.C36.1 | 0.48 | -0.21 ( -0.51 - 0.08 )  | 0.99 | 0.03 ( -0.27 - 0.34 )   |
| PC.aa.C40.1 | 0.67 | -0.12 ( -0.41 - 0.17 )  | 0.82 | -0.24 ( -0.54 - 0.06 )  |
| PC.aa.C30.3 | 0.38 | -0.28 ( -0.57 - 0.01 )  | 0.89 | -0.09 ( -0.39 - 0.2 )   |
| PC.aa.C32.2 | 0.86 | -0.05 ( -0.34 - 0.24 )  | 0.69 | -0.39 ( -0.69 - -0.09 ) |
| PC.aa.C32.3 | 0.75 | -0.09 ( -0.38 - 0.19 )  | 0.82 | 0.18 ( -0.12 - 0.48 )   |
| PC.aa.C34.2 | 0.70 | -0.11 ( -0.41 - 0.18 )  | 0.89 | 0.09 ( -0.21 - 0.39 )   |
| PC.aa.C34.3 | 0.43 | -0.26 ( -0.55 - 0.04 )  | 0.99 | 0.03 ( -0.27 - 0.33 )   |
| PC.aa.C34.4 | 0.45 | -0.23 ( -0.52 - 0.06 )  | 0.94 | 0.07 ( -0.23 - 0.37 )   |
| PC.aa.C34.5 | 0.14 | -0.46 ( -0.75 - -0.16 ) | 0.89 | -0.11 ( -0.4 - 0.19 )   |
| PC.aa.C36.2 | 0.77 | -0.08 ( -0.37 - 0.22 )  | 0.89 | 0.14 ( -0.16 - 0.45 )   |
| PC.aa.C36.3 | 0.55 | -0.16 ( -0.46 - 0.13 )  | 0.99 | -0.03 ( -0.33 - 0.28 )  |
| PC.aa.C36.4 | 0.50 | -0.21 ( -0.5 - 0.09 )   | 0.95 | -0.05 ( -0.36 - 0.25 )  |
| PC.aa.C36.5 | 0.24 | -0.37 ( -0.67 - -0.07 ) | 0.89 | -0.1 ( -0.41 - 0.21 )   |
| PC.aa.C36.6 | 0.57 | -0.16 ( -0.45 - 0.13 )  | 0.99 | -0.01 ( -0.31 - 0.29 )  |
| PC.aa.C38.2 | 0.49 | -0.21 ( -0.5 - 0.08 )   | 0.89 | -0.13 ( -0.43 - 0.16 )  |

|              |      |                         |      |                         |
|--------------|------|-------------------------|------|-------------------------|
| PC.aa.C38.3  | 0.68 | -0.11 ( -0.4 - 0.18 )   | 0.99 | 0.03 ( -0.28 - 0.33 )   |
| PC.aa.C38.4  | 0.58 | -0.15 ( -0.43 - 0.14 )  | 0.99 | -0.02 ( -0.33 - 0.28 )  |
| PC.aa.C38.5  | 0.67 | -0.12 ( -0.41 - 0.18 )  | 0.99 | -0.01 ( -0.31 - 0.29 )  |
| PC.aa.C38.6  | 0.62 | -0.14 ( -0.44 - 0.16 )  | 0.89 | -0.11 ( -0.42 - 0.21 )  |
| PC.aa.C40.2  | 0.53 | -0.18 ( -0.47 - 0.11 )  | 0.69 | -0.32 ( -0.62 - -0.03 ) |
| PC.aa.C40.3  | 0.45 | -0.22 ( -0.51 - 0.07 )  | 0.69 | -0.33 ( -0.62 - -0.03 ) |
| PC.aa.C40.4  | 0.98 | 0.01 ( -0.29 - 0.3 )    | 0.99 | 0.01 ( -0.3 - 0.32 )    |
| PC.aa.C40.5  | 0.74 | -0.1 ( -0.4 - 0.2 )     | 0.94 | -0.06 ( -0.37 - 0.25 )  |
| PC.aa.C40.6  | 0.86 | -0.05 ( -0.36 - 0.26 )  | 0.99 | -0.01 ( -0.34 - 0.31 )  |
| PC.aa.C42.5  | 0.62 | -0.13 ( -0.43 - 0.16 )  | 0.89 | -0.14 ( -0.45 - 0.17 )  |
| PC.aa.C43.6  | 0.78 | 0.07 ( -0.23 - 0.36 )   | 0.89 | 0.12 ( -0.19 - 0.43 )   |
| PC.aa.C44.12 | 0.50 | -0.22 ( -0.52 - 0.08 )  | 0.94 | -0.06 ( -0.37 - 0.25 )  |
| PC.ae.C30.0  | 0.49 | -0.22 ( -0.51 - 0.07 )  | 0.75 | -0.28 ( -0.58 - 0.02 )  |
| PC.ae.C32.0  | 0.52 | -0.19 ( -0.49 - 0.1 )   | 0.82 | -0.19 ( -0.49 - 0.11 )  |
| PC.ae.C34.0  | 0.18 | -0.4 ( -0.7 - -0.1 )    | 0.82 | -0.21 ( -0.52 - 0.09 )  |
| PC.ae.C36.0  | 0.99 | 0 ( -0.3 - 0.29 )       | 0.99 | -0.01 ( -0.31 - 0.29 )  |
| PC.ae.C38.0  | 0.45 | -0.23 ( -0.52 - 0.06 )  | 0.87 | -0.17 ( -0.47 - 0.13 )  |
| PC.ae.C40.0  | 0.45 | -0.22 ( -0.51 - 0.07 )  | 0.99 | 0.03 ( -0.27 - 0.34 )   |
| PC.ae.C32.1  | 0.52 | -0.19 ( -0.49 - 0.11 )  | 0.95 | -0.05 ( -0.36 - 0.25 )  |
| PC.ae.C34.1  | 0.33 | -0.32 ( -0.62 - -0.02 ) | 0.89 | -0.13 ( -0.43 - 0.17 )  |
| PC.ae.C36.1  | 0.50 | -0.2 ( -0.5 - 0.09 )    | 0.75 | -0.25 ( -0.56 - 0.05 )  |
| PC.ae.C40.1  | 0.75 | -0.09 ( -0.39 - 0.21 )  | 0.89 | -0.1 ( -0.4 - 0.2 )     |
| PC.ae.C42.1  | 0.99 | 0 ( -0.29 - 0.29 )      | 0.89 | -0.1 ( -0.41 - 0.21 )   |
| PC.ae.C32.2  | 0.14 | -0.44 ( -0.74 - -0.15 ) | 0.69 | -0.32 ( -0.62 - -0.01 ) |
| PC.ae.C34.2  | 0.45 | -0.23 ( -0.52 - 0.06 )  | 0.89 | -0.1 ( -0.4 - 0.2 )     |
| PC.ae.C34.3  | 0.45 | -0.25 ( -0.54 - 0.05 )  | 0.99 | -0.03 ( -0.33 - 0.27 )  |
| PC.ae.C34.4  | 0.15 | -0.42 ( -0.71 - -0.14 ) | 0.69 | -0.44 ( -0.74 - -0.15 ) |
| PC.ae.C36.2  | 0.45 | -0.24 ( -0.53 - 0.05 )  | 0.82 | -0.18 ( -0.48 - 0.12 )  |
| PC.ae.C36.3  | 0.77 | -0.08 ( -0.37 - 0.21 )  | 0.94 | -0.06 ( -0.35 - 0.24 )  |
| PC.ae.C36.4  | 0.50 | -0.21 ( -0.5 - 0.09 )   | 0.82 | -0.19 ( -0.49 - 0.11 )  |
| PC.ae.C36.5  | 0.62 | -0.13 ( -0.42 - 0.17 )  | 0.82 | -0.18 ( -0.48 - 0.12 )  |
| PC.ae.C38.2  | 0.28 | -0.34 ( -0.63 - -0.04 ) | 0.82 | -0.21 ( -0.51 - 0.08 )  |
| PC.ae.C38.3  | 0.40 | -0.27 ( -0.56 - 0.03 )  | 0.87 | -0.16 ( -0.46 - 0.14 )  |
| PC.ae.C38.4  | 0.57 | -0.16 ( -0.45 - 0.13 )  | 0.94 | -0.07 ( -0.37 - 0.23 )  |
| PC.ae.C38.5  | 0.62 | -0.13 ( -0.43 - 0.16 )  | 0.91 | -0.08 ( -0.38 - 0.22 )  |
| PC.ae.C38.6  | 0.58 | -0.15 ( -0.45 - 0.14 )  | 0.82 | -0.2 ( -0.5 - 0.1 )     |
| PC.ae.C40.2  | 0.82 | -0.06 ( -0.35 - 0.23 )  | 0.99 | -0.02 ( -0.31 - 0.28 )  |
| PC.ae.C40.3  | 0.38 | -0.28 ( -0.58 - 0.01 )  | 0.98 | -0.04 ( -0.35 - 0.27 )  |
| PC.ae.C40.4  | 0.28 | -0.34 ( -0.65 - -0.04 ) | 0.89 | -0.14 ( -0.44 - 0.17 )  |
| PC.ae.C40.5  | 0.38 | -0.29 ( -0.58 - 0.01 )  | 0.75 | -0.26 ( -0.56 - 0.05 )  |
| PC.ae.C40.6  | 0.45 | -0.25 ( -0.56 - 0.05 )  | 0.89 | -0.1 ( -0.41 - 0.22 )   |

|                 |      |                         |      |                        |
|-----------------|------|-------------------------|------|------------------------|
| PC.ae.C42.3     | 0.71 | -0.11 ( -0.4 - 0.18 )   | 0.89 | -0.1 ( -0.4 - 0.19 )   |
| PC.ae.C42.4     | 0.57 | -0.15 ( -0.44 - 0.14 )  | 0.89 | -0.09 ( -0.39 - 0.21 ) |
| PC.ae.C42.5     | 0.75 | -0.09 ( -0.39 - 0.21 )  | 0.99 | -0.03 ( -0.34 - 0.27 ) |
| PC.ae.C42.6     | 0.45 | -0.25 ( -0.56 - 0.05 )  | 0.87 | -0.17 ( -0.48 - 0.15 ) |
| lyso.PC.a.C14.0 | 0.71 | -0.11 ( -0.4 - 0.18 )   | 0.98 | 0.04 ( -0.26 - 0.34 )  |
| lyso.PC.a.C16.0 | 0.53 | 0.18 ( -0.12 - 0.47 )   | 0.91 | 0.08 ( -0.22 - 0.39 )  |
| lyso.PC.a.C18.0 | 0.53 | 0.18 ( -0.11 - 0.47 )   | 0.94 | 0.07 ( -0.23 - 0.38 )  |
| lyso.PC.a.C16.1 | 0.62 | -0.14 ( -0.44 - 0.16 )  | 0.94 | 0.06 ( -0.25 - 0.37 )  |
| lyso.PC.a.C18.1 | 0.53 | -0.18 ( -0.48 - 0.13 )  | 0.94 | -0.07 ( -0.38 - 0.24 ) |
| lyso.PC.a.C18.2 | 0.76 | -0.09 ( -0.39 - 0.22 )  | 0.82 | 0.21 ( -0.1 - 0.52 )   |
| lyso.PC.a.C18.3 | 0.89 | 0.04 ( -0.26 - 0.33 )   | 0.82 | 0.2 ( -0.09 - 0.5 )    |
| lyso.PC.a.C20.3 | 0.70 | -0.11 ( -0.41 - 0.19 )  | 0.97 | 0.04 ( -0.27 - 0.36 )  |
| lyso.PC.a.C20.4 | 0.57 | -0.16 ( -0.45 - 0.14 )  | 0.94 | 0.07 ( -0.24 - 0.38 )  |
| lyso.PC.a.C20.5 | 0.40 | -0.28 ( -0.58 - 0.02 )  | 0.94 | -0.07 ( -0.37 - 0.24 ) |
| lyso.PC.a.C22.6 | 0.55 | -0.17 ( -0.46 - 0.13 )  | 0.87 | -0.17 ( -0.47 - 0.14 ) |
| lyso.PC.e.C16.0 | 0.60 | -0.14 ( -0.43 - 0.14 )  | 0.89 | -0.1 ( -0.4 - 0.19 )   |
| lyso.PC.e.C18.0 | 0.45 | -0.24 ( -0.53 - 0.06 )  | 0.89 | -0.13 ( -0.43 - 0.18 ) |
| lyso.PC.e.C18.1 | 0.57 | -0.15 ( -0.44 - 0.15 )  | 0.99 | -0.01 ( -0.3 - 0.29 )  |
| SM.a.C30.1      | 0.43 | -0.25 ( -0.54 - 0.04 )  | 0.89 | -0.13 ( -0.43 - 0.17 ) |
| SM.a.C32.1      | 0.28 | -0.34 ( -0.63 - -0.04 ) | 0.89 | -0.14 ( -0.44 - 0.16 ) |
| SM.a.C33.1      | 0.30 | -0.32 ( -0.61 - -0.03 ) | 0.75 | -0.25 ( -0.55 - 0.05 ) |
| SM.a.C34.1      | 0.53 | -0.18 ( -0.48 - 0.11 )  | 0.89 | -0.13 ( -0.43 - 0.17 ) |
| SM.a.C35.1      | 0.82 | -0.06 ( -0.35 - 0.23 )  | 0.99 | -0.02 ( -0.32 - 0.28 ) |
| SM.a.C36.1      | 0.53 | -0.18 ( -0.47 - 0.11 )  | 0.94 | -0.06 ( -0.36 - 0.24 ) |
| SM.a.C37.1      | 0.44 | -0.26 ( -0.55 - 0.04 )  | 0.95 | -0.05 ( -0.34 - 0.25 ) |
| SM.a.C39.1      | 0.36 | -0.3 ( -0.59 - -0.01 )  | 0.95 | -0.05 ( -0.35 - 0.25 ) |
| SM.a.C41.1      | 0.18 | -0.4 ( -0.69 - -0.11 )  | 0.87 | -0.16 ( -0.46 - 0.15 ) |
| SM.a.C42.1      | 0.76 | -0.08 ( -0.37 - 0.21 )  | 0.89 | -0.1 ( -0.4 - 0.19 )   |
| SM.a.C43.1      | 0.28 | -0.34 ( -0.64 - -0.05 ) | 0.87 | -0.16 ( -0.46 - 0.14 ) |
| SM.a.C32.2      | 0.36 | -0.29 ( -0.58 - 0 )     | 0.91 | -0.08 ( -0.39 - 0.22 ) |
| SM.a.C34.2      | 0.54 | -0.17 ( -0.46 - 0.12 )  | 0.93 | -0.07 ( -0.37 - 0.23 ) |
| SM.a.C36.2      | 0.52 | -0.19 ( -0.48 - 0.1 )   | 0.99 | 0.03 ( -0.28 - 0.33 )  |
| SM.a.C36.3      | 0.75 | -0.09 ( -0.38 - 0.2 )   | 0.99 | -0.02 ( -0.32 - 0.28 ) |
| SM.a.C38.2      | 0.62 | -0.13 ( -0.43 - 0.16 )  | 0.91 | -0.09 ( -0.4 - 0.22 )  |
| SM.a.C38.3      | 0.77 | -0.08 ( -0.37 - 0.22 )  | 1.00 | 0 ( -0.31 - 0.31 )     |
| SM.a.C39.2      | 0.08 | -0.54 ( -0.83 - -0.24 ) | 0.99 | 0.02 ( -0.28 - 0.32 )  |
| SM.a.C40.2      | 0.53 | -0.18 ( -0.47 - 0.11 )  | 0.89 | -0.13 ( -0.44 - 0.18 ) |
| SM.a.C40.5      | 0.50 | -0.2 ( -0.49 - 0.1 )    | 0.82 | -0.19 ( -0.5 - 0.13 )  |
| SM.a.C41.2      | 0.50 | -0.19 ( -0.49 - 0.1 )   | 0.89 | -0.13 ( -0.42 - 0.17 ) |
| SM.a.C42.2      | 0.48 | -0.22 ( -0.51 - 0.07 )  | 0.82 | -0.2 ( -0.5 - 0.1 )    |
| SM.a.C42.3      | 0.76 | -0.08 ( -0.37 - 0.21 )  | 0.89 | -0.1 ( -0.41 - 0.2 )   |

|                  |      |                         |      |                        |
|------------------|------|-------------------------|------|------------------------|
| SM.a.C42.4       | 0.53 | -0.18 ( -0.47 - 0.12 )  | 0.98 | -0.04 ( -0.34 - 0.26 ) |
| SM.a.C42.6       | 0.54 | -0.17 ( -0.47 - 0.13 )  | 0.89 | -0.11 ( -0.42 - 0.2 )  |
| SM.a.C43.2       | 0.33 | -0.31 ( -0.59 - -0.02 ) | 0.99 | -0.02 ( -0.32 - 0.28 ) |
| SM.a.C44.6       | 0.52 | -0.2 ( -0.49 - 0.1 )    | 0.94 | -0.06 ( -0.38 - 0.25 ) |
| SM.e.C36.2       | 0.62 | -0.14 ( -0.43 - 0.16 )  | 0.92 | -0.08 ( -0.38 - 0.22 ) |
| SM.e.C38.3       | 0.49 | -0.2 ( -0.5 - 0.09 )    | 0.99 | -0.03 ( -0.32 - 0.27 ) |
| SM.e.C40.5       | 0.76 | -0.08 ( -0.37 - 0.21 )  | 0.89 | -0.11 ( -0.41 - 0.19 ) |
| Carn.a.C2.0      | 0.64 | 0.12 ( -0.17 - 0.41 )   | 0.69 | 0.37 ( 0.08 - 0.66 )   |
| Carn.a.C3.0      | 0.97 | 0.02 ( -0.28 - 0.31 )   | 0.89 | 0.14 ( -0.16 - 0.44 )  |
| Carn.a.C3.0.DC   | 0.70 | -0.11 ( -0.4 - 0.18 )   | 0.91 | 0.08 ( -0.22 - 0.38 )  |
| Carn.a.C4.0      | 0.75 | -0.09 ( -0.39 - 0.2 )   | 0.89 | 0.1 ( -0.21 - 0.4 )    |
| Carn.a.C5.0      | 0.97 | 0.01 ( -0.29 - 0.31 )   | 0.94 | -0.06 ( -0.37 - 0.25 ) |
| Carn.a.C6.0      | 0.97 | -0.02 ( -0.32 - 0.28 )  | 0.75 | 0.26 ( -0.05 - 0.57 )  |
| Carn.a.C6.0.OH   | 0.79 | 0.07 ( -0.22 - 0.35 )   | 0.95 | 0.05 ( -0.25 - 0.35 )  |
| Carn.a.C8.0      | 0.73 | -0.1 ( -0.39 - 0.2 )    | 0.94 | 0.06 ( -0.23 - 0.36 )  |
| Carn.a.C8.1      | 0.62 | -0.14 ( -0.44 - 0.15 )  | 0.87 | -0.17 ( -0.47 - 0.14 ) |
| Carn.a.C9.0      | 0.77 | 0.08 ( -0.21 - 0.37 )   | 0.89 | 0.13 ( -0.17 - 0.44 )  |
| Carn.a.C10.0     | 0.53 | -0.18 ( -0.47 - 0.11 )  | 0.95 | 0.05 ( -0.25 - 0.36 )  |
| Carn.a.C10.1     | 0.77 | 0.07 ( -0.22 - 0.36 )   | 0.82 | 0.19 ( -0.12 - 0.5 )   |
| Carn.a.C12.0     | 0.91 | -0.03 ( -0.32 - 0.26 )  | 0.89 | 0.12 ( -0.19 - 0.42 )  |
| Carn.a.C14.1     | 0.86 | -0.04 ( -0.33 - 0.25 )  | 0.94 | 0.06 ( -0.25 - 0.36 )  |
| Carn.a.C14.2     | 0.71 | 0.1 ( -0.19 - 0.39 )    | 0.82 | 0.2 ( -0.11 - 0.5 )    |
| Carn.a.C15.0     | 0.85 | 0.05 ( -0.24 - 0.34 )   | 0.82 | 0.19 ( -0.11 - 0.49 )  |
| Carn.a.C16.0     | 0.36 | 0.3 ( 0.01 - 0.6 )      | 0.89 | 0.1 ( -0.2 - 0.4 )     |
| Carn.a.C16.0.Oxo | 0.88 | 0.04 ( -0.25 - 0.33 )   | 1.00 | 0 ( -0.3 - 0.3 )       |
| Carn.a.C16.1     | 0.58 | 0.15 ( -0.15 - 0.44 )   | 0.82 | 0.2 ( -0.1 - 0.5 )     |
| Carn.a.C16.2     | 0.78 | 0.07 ( -0.22 - 0.36 )   | 0.99 | 0.02 ( -0.29 - 0.32 )  |
| Carn.a.C18.0     | 0.86 | 0.04 ( -0.25 - 0.33 )   | 0.89 | 0.09 ( -0.21 - 0.38 )  |
| Carn.a.C18.1     | 0.53 | 0.17 ( -0.12 - 0.47 )   | 0.99 | 0.01 ( -0.29 - 0.31 )  |
| Carn.a.C18.2     | 0.08 | 0.51 ( 0.22 - 0.8 )     | 0.69 | 0.31 ( 0.01 - 0.62 )   |
| Carn.a.C18.2.OH  | 0.77 | 0.08 ( -0.21 - 0.37 )   | 1.00 | 0 ( -0.31 - 0.31 )     |
| Carn.a.C20.0     | 0.86 | 0.05 ( -0.24 - 0.33 )   | 0.89 | 0.09 ( -0.2 - 0.39 )   |
| Carn.a.C20.1     | 0.74 | 0.1 ( -0.19 - 0.39 )    | 0.82 | 0.18 ( -0.11 - 0.48 )  |
| Carn.a.C20.3     | 0.68 | 0.12 ( -0.17 - 0.41 )   | 0.95 | 0.05 ( -0.25 - 0.35 )  |
| Carn.a.C20.4     | 0.75 | 0.09 ( -0.19 - 0.38 )   | 0.87 | 0.17 ( -0.13 - 0.48 )  |
| BCAA             | 0.89 | 0.04 ( -0.26 - 0.33 )   | 0.82 | 0.21 ( -0.09 - 0.52 )  |
| AAA              | 0.88 | -0.03 ( -0.33 - 0.26 )  | 0.89 | 0.11 ( -0.2 - 0.41 )   |
| EAA              | 1.00 | 0 ( -0.29 - 0.29 )      | 0.82 | 0.18 ( -0.12 - 0.49 )  |
| NEAA             | 0.62 | 0.14 ( -0.16 - 0.43 )   | 0.75 | 0.29 ( -0.02 - 0.59 )  |
| AA               | 0.76 | 0.08 ( -0.21 - 0.37 )   | 0.75 | 0.26 ( -0.05 - 0.56 )  |
| SATURATEDNEFA    | 0.74 | -0.1 ( -0.39 - 0.2 )    | 0.82 | 0.23 ( -0.07 - 0.53 )  |

|                                                                                                                                                                                                                                                                                                                                                                                                                                                                                                                                        |      |                        |      |                        |
|----------------------------------------------------------------------------------------------------------------------------------------------------------------------------------------------------------------------------------------------------------------------------------------------------------------------------------------------------------------------------------------------------------------------------------------------------------------------------------------------------------------------------------------|------|------------------------|------|------------------------|
| MONOUNSATNEFA                                                                                                                                                                                                                                                                                                                                                                                                                                                                                                                          | 0.38 | -0.28 ( -0.57 - 0.01 ) | 0.94 | 0.07 ( -0.23 - 0.38 )  |
| POLYUNSATNEFA                                                                                                                                                                                                                                                                                                                                                                                                                                                                                                                          | 0.49 | -0.21 ( -0.5 - 0.08 )  | 0.89 | 0.13 ( -0.17 - 0.43 )  |
| NEFA                                                                                                                                                                                                                                                                                                                                                                                                                                                                                                                                   | 0.52 | -0.19 ( -0.48 - 0.11 ) | 0.87 | 0.16 ( -0.14 - 0.46 )  |
| SATURATEDPCaa                                                                                                                                                                                                                                                                                                                                                                                                                                                                                                                          | 0.38 | -0.29 ( -0.59 - 0.01 ) | 0.89 | -0.14 ( -0.45 - 0.16 ) |
| MONOUNSATPCaa                                                                                                                                                                                                                                                                                                                                                                                                                                                                                                                          | 0.52 | -0.19 ( -0.49 - 0.11 ) | 0.99 | 0.01 ( -0.29 - 0.31 )  |
| POLYUNSATPCaa                                                                                                                                                                                                                                                                                                                                                                                                                                                                                                                          | 0.54 | -0.17 ( -0.46 - 0.12 ) | 0.99 | -0.01 ( -0.31 - 0.29 ) |
| PCaa                                                                                                                                                                                                                                                                                                                                                                                                                                                                                                                                   | 0.53 | -0.18 ( -0.47 - 0.11 ) | 0.99 | -0.01 ( -0.31 - 0.29 ) |
| SATURATEDPCae                                                                                                                                                                                                                                                                                                                                                                                                                                                                                                                          | 0.41 | -0.26 ( -0.56 - 0.03 ) | 0.94 | -0.07 ( -0.37 - 0.24 ) |
| MONOUNSATPCae                                                                                                                                                                                                                                                                                                                                                                                                                                                                                                                          | 0.41 | -0.27 ( -0.56 - 0.03 ) | 0.87 | -0.16 ( -0.46 - 0.14 ) |
| POLYUNSATPCae                                                                                                                                                                                                                                                                                                                                                                                                                                                                                                                          | 0.48 | -0.22 ( -0.51 - 0.07 ) | 0.87 | -0.16 ( -0.46 - 0.14 ) |
| PCae                                                                                                                                                                                                                                                                                                                                                                                                                                                                                                                                   | 0.45 | -0.24 ( -0.54 - 0.05 ) | 0.89 | -0.15 ( -0.45 - 0.15 ) |
| SATURATEDLYSOPCa                                                                                                                                                                                                                                                                                                                                                                                                                                                                                                                       | 0.54 | 0.17 ( -0.13 - 0.46 )  | 0.91 | 0.08 ( -0.22 - 0.39 )  |
| MONOUNSATLYSOPCa                                                                                                                                                                                                                                                                                                                                                                                                                                                                                                                       | 0.54 | -0.17 ( -0.48 - 0.14 ) | 0.99 | -0.03 ( -0.34 - 0.28 ) |
| POLYUNSATLYSOPCa                                                                                                                                                                                                                                                                                                                                                                                                                                                                                                                       | 0.62 | -0.14 ( -0.44 - 0.16 ) | 0.89 | 0.11 ( -0.21 - 0.42 )  |
| LYSOPCa                                                                                                                                                                                                                                                                                                                                                                                                                                                                                                                                | 0.86 | 0.05 ( -0.25 - 0.34 )  | 0.92 | 0.08 ( -0.23 - 0.38 )  |
| SATURATEDLYSOPCe                                                                                                                                                                                                                                                                                                                                                                                                                                                                                                                       | 0.45 | -0.23 ( -0.52 - 0.07 ) | 0.89 | -0.13 ( -0.44 - 0.17 ) |
| lyso.PC.e.C18.1                                                                                                                                                                                                                                                                                                                                                                                                                                                                                                                        | 0.57 | -0.15 ( -0.44 - 0.15 ) | 0.99 | -0.01 ( -0.3 - 0.29 )  |
| LYSOPCe                                                                                                                                                                                                                                                                                                                                                                                                                                                                                                                                | 0.45 | -0.22 ( -0.51 - 0.07 ) | 0.89 | -0.12 ( -0.42 - 0.18 ) |
| MONOUNSATSM                                                                                                                                                                                                                                                                                                                                                                                                                                                                                                                            | 0.50 | -0.2 ( -0.5 - 0.09 )   | 0.89 | -0.12 ( -0.42 - 0.18 ) |
| POLYUNSATSM                                                                                                                                                                                                                                                                                                                                                                                                                                                                                                                            | 0.50 | -0.2 ( -0.49 - 0.09 )  | 0.89 | -0.13 ( -0.43 - 0.18 ) |
| SM                                                                                                                                                                                                                                                                                                                                                                                                                                                                                                                                     | 0.50 | -0.2 ( -0.5 - 0.09 )   | 0.89 | -0.13 ( -0.43 - 0.17 ) |
| Carn                                                                                                                                                                                                                                                                                                                                                                                                                                                                                                                                   | 0.44 | 0.25 ( -0.04 - 0.54 )  | 0.69 | 0.34 ( 0.05 - 0.63 )   |
| SHORTCHAINCARNa                                                                                                                                                                                                                                                                                                                                                                                                                                                                                                                        | 0.71 | 0.1 ( -0.19 - 0.39 )   | 0.69 | 0.34 ( 0.05 - 0.64 )   |
| MEDIUMCHAINCARNa                                                                                                                                                                                                                                                                                                                                                                                                                                                                                                                       | 0.83 | -0.06 ( -0.35 - 0.23 ) | 0.89 | 0.11 ( -0.2 - 0.41 )   |
| LONGCHAINCARNa                                                                                                                                                                                                                                                                                                                                                                                                                                                                                                                         | 0.50 | 0.2 ( -0.09 - 0.49 )   | 0.89 | 0.14 ( -0.16 - 0.44 )  |
| ACYLCARN                                                                                                                                                                                                                                                                                                                                                                                                                                                                                                                               | 0.70 | 0.11 ( -0.19 - 0.4 )   | 0.69 | 0.32 ( 0.03 - 0.62 )   |
| Values represent absolute differences in SRS score and corresponding p-values from linear regression models that reflect the difference in SRS score at age 6 and 13 per SDS increase in cord-blood metabolite concentrations (μmol/L). Model includes sex and age at outcome. AA amino acids, NEFA non-esterified fatty acids, PC.aa diacyl-phosphatidylcholines, PC.ae acyl-alkyl-phosphatidylcholines, lyso.PC.a. acyl-lysophosphatidylcholines, lyso.PC.e alkyl-lysophosphatidylcholines, Carn.a acylcarnitines, SM sphingomyelins |      |                        |      |                        |



**Supplemental Table S5.** Associations of cord-blood individual metabolites and metabolite groups with SRS scores at age 6 and 13. Adjusted model

|            | Differences in SRS score age 6<br>N = 716 |                            | Differences in SRS score age 13<br>N = 648 |                            |
|------------|-------------------------------------------|----------------------------|--------------------------------------------|----------------------------|
| Metabolite | P-value                                   | Estimate<br>(95%-Interval) | P-value                                    | Estimate<br>(95%-Interval) |
| Ala        | 1.00                                      | 0 ( -0.3 - 0.3 )           | 0.83                                       | 0.25 ( -0.05 - 0.55 )      |
| Arg        | 0.45                                      | -0.23 ( -0.52 - 0.06 )     | 0.98                                       | 0.03 ( -0.27 - 0.34 )      |
| Asn        | 0.88                                      | 0.04 ( -0.25 - 0.33 )      | 0.71                                       | 0.28 ( -0.02 - 0.58 )      |
| Asp        | 0.44                                      | 0.24 ( -0.05 - 0.53 )      | 0.71                                       | 0.29 ( -0.02 - 0.59 )      |
| Cit        | 0.62                                      | 0.13 ( -0.17 - 0.42 )      | 0.84                                       | 0.19 ( -0.11 - 0.49 )      |
| Gln        | 0.81                                      | 0.06 ( -0.23 - 0.35 )      | 0.93                                       | 0.14 ( -0.16 - 0.45 )      |
| Glu        | 0.50                                      | 0.2 ( -0.09 - 0.49 )       | 0.84                                       | 0.21 ( -0.09 - 0.5 )       |
| Gly        | 0.62                                      | 0.13 ( -0.16 - 0.42 )      | 0.84                                       | 0.19 ( -0.11 - 0.5 )       |
| His        | 0.77                                      | -0.07 ( -0.37 - 0.22 )     | 0.94                                       | 0.09 ( -0.21 - 0.39 )      |
| Ile        | 0.77                                      | 0.08 ( -0.22 - 0.37 )      | 0.84                                       | 0.2 ( -0.1 - 0.5 )         |
| Leu        | 0.86                                      | 0.04 ( -0.25 - 0.33 )      | 0.84                                       | 0.21 ( -0.09 - 0.51 )      |
| Lys        | 0.88                                      | 0.04 ( -0.26 - 0.33 )      | 0.99                                       | -0.03 ( -0.34 - 0.28 )     |
| Met        | 0.98                                      | 0.01 ( -0.28 - 0.3 )       | 0.82                                       | 0.26 ( -0.04 - 0.57 )      |
| Orn        | 0.33                                      | 0.31 ( 0.02 - 0.6 )        | 0.83                                       | 0.25 ( -0.05 - 0.55 )      |
| Phe        | 0.91                                      | 0.03 ( -0.26 - 0.32 )      | 0.93                                       | 0.13 ( -0.18 - 0.44 )      |
| Pro        | 0.54                                      | 0.16 ( -0.13 - 0.45 )      | 0.84                                       | 0.22 ( -0.08 - 0.52 )      |
| Trp        | 0.62                                      | -0.14 ( -0.43 - 0.15 )     | 0.94                                       | 0.05 ( -0.25 - 0.36 )      |
| Ser        | 0.45                                      | 0.23 ( -0.06 - 0.52 )      | 0.84                                       | 0.21 ( -0.09 - 0.52 )      |
| Thr        | 0.86                                      | -0.04 ( -0.33 - 0.25 )     | 0.84                                       | 0.23 ( -0.07 - 0.53 )      |
| Tyr        | 0.97                                      | 0.01 ( -0.28 - 0.31 )      | 0.93                                       | 0.14 ( -0.16 - 0.45 )      |
| Val        | 0.97                                      | 0.01 ( -0.28 - 0.3 )       | 0.84                                       | 0.2 ( -0.1 - 0.5 )         |
| Cys        | 0.97                                      | 0.02 ( -0.27 - 0.3 )       | 0.99                                       | -0.01 ( -0.32 - 0.29 )     |
| NEFA_14_0  | 0.24                                      | -0.36 ( -0.64 - -0.07 )    | 0.94                                       | 0.06 ( -0.24 - 0.36 )      |
| NEFA_15_0  | 0.18                                      | -0.39 ( -0.68 - -0.1 )     | 0.99                                       | 0 ( -0.3 - 0.3 )           |
| NEFA_16_0  | 0.76                                      | -0.08 ( -0.37 - 0.21 )     | 0.84                                       | 0.22 ( -0.08 - 0.52 )      |
| NEFA_17_0  | 0.52                                      | -0.19 ( -0.48 - 0.1 )      | 0.93                                       | 0.14 ( -0.16 - 0.44 )      |
| NEFA_18_0  | 0.82                                      | 0.06 ( -0.23 - 0.35 )      | 0.71                                       | 0.29 ( -0.01 - 0.59 )      |
| NEFA_24_0  | 0.75                                      | -0.09 ( -0.37 - 0.2 )      | 0.82                                       | 0.26 ( -0.03 - 0.56 )      |
| NEFA_26_0  | 0.45                                      | -0.23 ( -0.52 - 0.07 )     | 0.84                                       | 0.19 ( -0.11 - 0.48 )      |
| NEFA_14_1  | 0.18                                      | -0.4 ( -0.69 - -0.11 )     | 0.99                                       | -0.02 ( -0.32 - 0.29 )     |
| NEFA_16_1  | 0.38                                      | -0.29 ( -0.58 - 0 )        | 0.99                                       | 0.02 ( -0.29 - 0.33 )      |
| NEFA_17_1  | 0.28                                      | -0.33 ( -0.62 - -0.04 )    | 0.99                                       | 0.01 ( -0.29 - 0.31 )      |
| NEFA_18_1  | 0.41                                      | -0.26 ( -0.55 - 0.03 )     | 0.94                                       | 0.09 ( -0.22 - 0.39 )      |
| NEFA_19_1  | 0.24                                      | -0.36 ( -0.65 - -0.07 )    | 0.94                                       | 0.07 ( -0.23 - 0.37 )      |

|             |      |                         |      |                         |
|-------------|------|-------------------------|------|-------------------------|
| NEFA_20_1   | 0.62 | -0.14 ( -0.43 - 0.15 )  | 0.93 | 0.11 ( -0.19 - 0.41 )   |
| NEFA_24_1   | 0.62 | -0.13 ( -0.42 - 0.16 )  | 0.84 | 0.23 ( -0.06 - 0.53 )   |
| NEFA_26_1   | 0.52 | -0.19 ( -0.48 - 0.1 )   | 0.90 | 0.17 ( -0.14 - 0.47 )   |
| NEFA_16_2   | 0.42 | -0.26 ( -0.55 - 0.03 )  | 0.93 | 0.11 ( -0.19 - 0.41 )   |
| NEFA_17_2   | 0.36 | -0.3 ( -0.59 - 0 )      | 0.94 | -0.05 ( -0.35 - 0.25 )  |
| NEFA_18_2   | 0.53 | -0.18 ( -0.47 - 0.11 )  | 0.93 | 0.15 ( -0.15 - 0.45 )   |
| NEFA_18_3   | 0.38 | -0.28 ( -0.57 - 0.01 )  | 0.94 | 0.09 ( -0.21 - 0.38 )   |
| NEFA_20_2   | 0.84 | -0.05 ( -0.35 - 0.24 )  | 0.86 | 0.18 ( -0.12 - 0.48 )   |
| NEFA_20_3   | 0.64 | -0.12 ( -0.41 - 0.17 )  | 0.94 | 0.06 ( -0.23 - 0.35 )   |
| NEFA_20_4   | 0.43 | -0.25 ( -0.54 - 0.04 )  | 0.99 | 0 ( -0.29 - 0.3 )       |
| NEFA_20_5   | 0.28 | -0.34 ( -0.63 - -0.05 ) | 0.84 | -0.21 ( -0.52 - 0.09 )  |
| NEFA_22_3   | 0.97 | 0.01 ( -0.28 - 0.3 )    | 0.89 | 0.17 ( -0.12 - 0.46 )   |
| NEFA_22_4   | 0.58 | -0.15 ( -0.45 - 0.14 )  | 0.94 | 0.09 ( -0.21 - 0.4 )    |
| NEFA_22_5   | 0.62 | -0.13 ( -0.42 - 0.16 )  | 0.99 | 0.02 ( -0.28 - 0.32 )   |
| NEFA_22_6   | 0.53 | -0.17 ( -0.47 - 0.12 )  | 0.94 | 0.05 ( -0.25 - 0.35 )   |
| NEFA_24_2   | 0.81 | -0.06 ( -0.35 - 0.23 )  | 0.71 | 0.34 ( 0.04 - 0.64 )    |
| NEFA_24_4   | 0.62 | 0.13 ( -0.16 - 0.42 )   | 0.71 | 0.29 ( -0.01 - 0.59 )   |
| NEFA_24_5   | 0.96 | -0.02 ( -0.31 - 0.27 )  | 0.84 | 0.2 ( -0.09 - 0.5 )     |
| NEFA_26_2   | 0.85 | -0.05 ( -0.34 - 0.24 )  | 0.84 | 0.23 ( -0.07 - 0.53 )   |
| PC.aa.C30.0 | 0.18 | -0.41 ( -0.71 - -0.11 ) | 0.94 | -0.05 ( -0.36 - 0.25 )  |
| PC.aa.C32.0 | 0.40 | -0.28 ( -0.58 - 0.02 )  | 0.93 | -0.15 ( -0.46 - 0.16 )  |
| PC.aa.C36.0 | 0.83 | -0.05 ( -0.34 - 0.23 )  | 0.99 | 0.02 ( -0.29 - 0.32 )   |
| PC.aa.C38.0 | 0.67 | -0.12 ( -0.42 - 0.18 )  | 0.94 | -0.08 ( -0.39 - 0.22 )  |
| PC.aa.C40.0 | 0.75 | -0.09 ( -0.38 - 0.21 )  | 0.93 | -0.14 ( -0.44 - 0.16 )  |
| PC.aa.C42.0 | 0.62 | -0.14 ( -0.44 - 0.17 )  | 0.93 | -0.12 ( -0.43 - 0.2 )   |
| PC.aa.C32.1 | 0.33 | -0.33 ( -0.63 - -0.03 ) | 0.99 | -0.03 ( -0.33 - 0.28 )  |
| PC.aa.C34.1 | 0.57 | -0.16 ( -0.46 - 0.14 )  | 0.99 | 0.02 ( -0.28 - 0.32 )   |
| PC.aa.C36.1 | 0.48 | -0.22 ( -0.51 - 0.08 )  | 0.96 | 0.04 ( -0.26 - 0.34 )   |
| PC.aa.C40.1 | 0.67 | -0.12 ( -0.41 - 0.17 )  | 0.83 | -0.25 ( -0.55 - 0.05 )  |
| PC.aa.C30.3 | 0.38 | -0.28 ( -0.57 - 0.01 )  | 0.94 | -0.09 ( -0.39 - 0.21 )  |
| PC.aa.C32.2 | 0.86 | -0.05 ( -0.34 - 0.24 )  | 0.71 | -0.38 ( -0.68 - -0.08 ) |
| PC.aa.C32.3 | 0.75 | -0.09 ( -0.38 - 0.2 )   | 0.84 | 0.19 ( -0.11 - 0.49 )   |
| PC.aa.C34.2 | 0.70 | -0.11 ( -0.4 - 0.19 )   | 0.94 | 0.1 ( -0.2 - 0.4 )      |
| PC.aa.C34.3 | 0.43 | -0.26 ( -0.55 - 0.04 )  | 0.98 | 0.04 ( -0.26 - 0.34 )   |
| PC.aa.C34.4 | 0.45 | -0.23 ( -0.52 - 0.06 )  | 0.94 | 0.07 ( -0.23 - 0.37 )   |
| PC.aa.C34.5 | 0.14 | -0.45 ( -0.75 - -0.16 ) | 0.94 | -0.09 ( -0.39 - 0.21 )  |
| PC.aa.C36.2 | 0.77 | -0.08 ( -0.37 - 0.22 )  | 0.93 | 0.15 ( -0.15 - 0.46 )   |
| PC.aa.C36.3 | 0.55 | -0.16 ( -0.46 - 0.13 )  | 0.99 | -0.02 ( -0.32 - 0.29 )  |
| PC.aa.C36.4 | 0.50 | -0.2 ( -0.49 - 0.09 )   | 0.94 | -0.05 ( -0.35 - 0.26 )  |
| PC.aa.C36.5 | 0.24 | -0.37 ( -0.66 - -0.07 ) | 0.94 | -0.08 ( -0.39 - 0.23 )  |
| PC.aa.C36.6 | 0.57 | -0.16 ( -0.44 - 0.13 )  | 0.99 | 0 ( -0.3 - 0.3 )        |

|              |      |                         |      |                         |
|--------------|------|-------------------------|------|-------------------------|
| PC.aa.C38.2  | 0.49 | -0.21 ( -0.5 - 0.08 )   | 0.93 | -0.13 ( -0.42 - 0.17 )  |
| PC.aa.C38.3  | 0.68 | -0.11 ( -0.41 - 0.18 )  | 0.98 | 0.04 ( -0.27 - 0.34 )   |
| PC.aa.C38.4  | 0.58 | -0.15 ( -0.44 - 0.14 )  | 0.99 | -0.02 ( -0.32 - 0.28 )  |
| PC.aa.C38.5  | 0.67 | -0.12 ( -0.41 - 0.18 )  | 0.99 | 0 ( -0.3 - 0.3 )        |
| PC.aa.C38.6  | 0.62 | -0.14 ( -0.44 - 0.16 )  | 0.94 | -0.09 ( -0.41 - 0.22 )  |
| PC.aa.C40.2  | 0.53 | -0.18 ( -0.47 - 0.11 )  | 0.71 | -0.32 ( -0.62 - -0.02 ) |
| PC.aa.C40.3  | 0.45 | -0.23 ( -0.52 - 0.06 )  | 0.71 | -0.32 ( -0.61 - -0.02 ) |
| PC.aa.C40.4  | 0.98 | 0.01 ( -0.29 - 0.3 )    | 0.99 | 0.01 ( -0.29 - 0.32 )   |
| PC.aa.C40.5  | 0.74 | -0.1 ( -0.4 - 0.2 )     | 0.94 | -0.05 ( -0.36 - 0.25 )  |
| PC.aa.C40.6  | 0.86 | -0.05 ( -0.36 - 0.26 )  | 0.99 | 0 ( -0.33 - 0.32 )      |
| PC.aa.C42.5  | 0.62 | -0.13 ( -0.43 - 0.17 )  | 0.93 | -0.14 ( -0.44 - 0.17 )  |
| PC.aa.C43.6  | 0.78 | 0.07 ( -0.23 - 0.37 )   | 0.93 | 0.13 ( -0.18 - 0.44 )   |
| PC.aa.C44.12 | 0.50 | -0.21 ( -0.51 - 0.09 )  | 0.94 | -0.08 ( -0.39 - 0.24 )  |
| PC.ae.C30.0  | 0.49 | -0.21 ( -0.5 - 0.08 )   | 0.71 | -0.28 ( -0.58 - 0.01 )  |
| PC.ae.C32.0  | 0.52 | -0.19 ( -0.49 - 0.1 )   | 0.86 | -0.18 ( -0.48 - 0.12 )  |
| PC.ae.C34.0  | 0.18 | -0.4 ( -0.71 - -0.1 )   | 0.84 | -0.2 ( -0.5 - 0.11 )    |
| PC.ae.C36.0  | 0.99 | 0 ( -0.3 - 0.29 )       | 0.99 | 0 ( -0.3 - 0.31 )       |
| PC.ae.C38.0  | 0.45 | -0.23 ( -0.52 - 0.06 )  | 0.93 | -0.15 ( -0.46 - 0.15 )  |
| PC.ae.C40.0  | 0.45 | -0.22 ( -0.52 - 0.07 )  | 0.94 | 0.05 ( -0.25 - 0.36 )   |
| PC.ae.C32.1  | 0.52 | -0.19 ( -0.49 - 0.11 )  | 0.98 | -0.04 ( -0.35 - 0.27 )  |
| PC.ae.C34.1  | 0.33 | -0.32 ( -0.62 - -0.02 ) | 0.93 | -0.11 ( -0.42 - 0.19 )  |
| PC.ae.C36.1  | 0.50 | -0.2 ( -0.5 - 0.1 )     | 0.84 | -0.24 ( -0.54 - 0.07 )  |
| PC.ae.C40.1  | 0.75 | -0.09 ( -0.39 - 0.21 )  | 0.94 | -0.09 ( -0.39 - 0.21 )  |
| PC.ae.C42.1  | 0.99 | 0 ( -0.29 - 0.29 )      | 0.94 | -0.11 ( -0.41 - 0.2 )   |
| PC.ae.C32.2  | 0.14 | -0.44 ( -0.74 - -0.15 ) | 0.71 | -0.3 ( -0.61 - 0 )      |
| PC.ae.C34.2  | 0.45 | -0.23 ( -0.52 - 0.07 )  | 0.94 | -0.09 ( -0.39 - 0.22 )  |
| PC.ae.C34.3  | 0.45 | -0.24 ( -0.54 - 0.05 )  | 0.99 | -0.03 ( -0.33 - 0.27 )  |
| PC.ae.C34.4  | 0.15 | -0.42 ( -0.71 - -0.14 ) | 0.71 | -0.43 ( -0.73 - -0.13 ) |
| PC.ae.C36.2  | 0.45 | -0.24 ( -0.53 - 0.06 )  | 0.90 | -0.16 ( -0.46 - 0.13 )  |
| PC.ae.C36.3  | 0.77 | -0.08 ( -0.37 - 0.22 )  | 0.95 | -0.04 ( -0.34 - 0.25 )  |
| PC.ae.C36.4  | 0.50 | -0.2 ( -0.5 - 0.09 )    | 0.85 | -0.18 ( -0.48 - 0.12 )  |
| PC.ae.C36.5  | 0.62 | -0.13 ( -0.42 - 0.17 )  | 0.89 | -0.17 ( -0.48 - 0.13 )  |
| PC.ae.C38.2  | 0.28 | -0.33 ( -0.62 - -0.04 ) | 0.84 | -0.21 ( -0.51 - 0.08 )  |
| PC.ae.C38.3  | 0.40 | -0.27 ( -0.56 - 0.02 )  | 0.93 | -0.15 ( -0.45 - 0.15 )  |
| PC.ae.C38.4  | 0.57 | -0.16 ( -0.45 - 0.14 )  | 0.94 | -0.07 ( -0.37 - 0.24 )  |
| PC.ae.C38.5  | 0.62 | -0.14 ( -0.43 - 0.16 )  | 0.94 | -0.08 ( -0.38 - 0.22 )  |
| PC.ae.C38.6  | 0.58 | -0.15 ( -0.44 - 0.14 )  | 0.84 | -0.2 ( -0.5 - 0.1 )     |
| PC.ae.C40.2  | 0.82 | -0.06 ( -0.35 - 0.23 )  | 0.99 | -0.02 ( -0.32 - 0.28 )  |
| PC.ae.C40.3  | 0.38 | -0.28 ( -0.58 - 0.01 )  | 0.98 | -0.04 ( -0.34 - 0.27 )  |
| PC.ae.C40.4  | 0.28 | -0.35 ( -0.65 - -0.04 ) | 0.93 | -0.13 ( -0.44 - 0.18 )  |
| PC.ae.C40.5  | 0.38 | -0.29 ( -0.58 - 0.01 )  | 0.83 | -0.25 ( -0.55 - 0.05 )  |

|                 |      |                         |      |                        |
|-----------------|------|-------------------------|------|------------------------|
| PC.ae.C40.6     | 0.45 | -0.25 ( -0.56 - 0.05 )  | 0.94 | -0.08 ( -0.4 - 0.24 )  |
| PC.ae.C42.3     | 0.71 | -0.1 ( -0.39 - 0.19 )   | 0.94 | -0.1 ( -0.4 - 0.19 )   |
| PC.ae.C42.4     | 0.57 | -0.15 ( -0.44 - 0.14 )  | 0.94 | -0.08 ( -0.38 - 0.21 ) |
| PC.ae.C42.5     | 0.75 | -0.09 ( -0.39 - 0.21 )  | 0.99 | -0.02 ( -0.33 - 0.28 ) |
| PC.ae.C42.6     | 0.45 | -0.25 ( -0.55 - 0.06 )  | 0.93 | -0.16 ( -0.48 - 0.15 ) |
| lyso.PC.a.C14.0 | 0.71 | -0.1 ( -0.39 - 0.19 )   | 0.96 | 0.04 ( -0.26 - 0.34 )  |
| lyso.PC.a.C16.0 | 0.53 | 0.18 ( -0.12 - 0.47 )   | 0.94 | 0.09 ( -0.22 - 0.39 )  |
| lyso.PC.a.C18.0 | 0.53 | 0.18 ( -0.11 - 0.47 )   | 0.94 | 0.07 ( -0.24 - 0.38 )  |
| lyso.PC.a.C16.1 | 0.62 | -0.14 ( -0.44 - 0.16 )  | 0.94 | 0.06 ( -0.24 - 0.37 )  |
| lyso.PC.a.C18.1 | 0.53 | -0.18 ( -0.49 - 0.12 )  | 0.94 | -0.07 ( -0.38 - 0.24 ) |
| lyso.PC.a.C18.2 | 0.76 | -0.08 ( -0.39 - 0.22 )  | 0.84 | 0.21 ( -0.11 - 0.52 )  |
| lyso.PC.a.C18.3 | 0.89 | 0.03 ( -0.26 - 0.33 )   | 0.84 | 0.2 ( -0.1 - 0.5 )     |
| lyso.PC.a.C20.3 | 0.70 | -0.11 ( -0.41 - 0.19 )  | 0.94 | 0.05 ( -0.26 - 0.36 )  |
| lyso.PC.a.C20.4 | 0.57 | -0.16 ( -0.45 - 0.14 )  | 0.94 | 0.07 ( -0.24 - 0.38 )  |
| lyso.PC.a.C20.5 | 0.40 | -0.27 ( -0.57 - 0.02 )  | 0.94 | -0.06 ( -0.36 - 0.25 ) |
| lyso.PC.a.C22.6 | 0.55 | -0.17 ( -0.46 - 0.13 )  | 0.90 | -0.17 ( -0.48 - 0.14 ) |
| lyso.PC.e.C16.0 | 0.60 | -0.14 ( -0.43 - 0.15 )  | 0.94 | -0.1 ( -0.39 - 0.19 )  |
| lyso.PC.e.C18.0 | 0.45 | -0.24 ( -0.53 - 0.06 )  | 0.93 | -0.12 ( -0.43 - 0.18 ) |
| lyso.PC.e.C18.1 | 0.57 | -0.16 ( -0.45 - 0.14 )  | 0.99 | -0.01 ( -0.31 - 0.29 ) |
| SM.a.C30.1      | 0.43 | -0.25 ( -0.54 - 0.04 )  | 0.93 | -0.13 ( -0.43 - 0.17 ) |
| SM.a.C32.1      | 0.28 | -0.33 ( -0.63 - -0.04 ) | 0.93 | -0.13 ( -0.43 - 0.17 ) |
| SM.a.C33.1      | 0.30 | -0.32 ( -0.61 - -0.03 ) | 0.84 | -0.24 ( -0.54 - 0.06 ) |
| SM.a.C34.1      | 0.53 | -0.18 ( -0.48 - 0.11 )  | 0.93 | -0.12 ( -0.42 - 0.18 ) |
| SM.a.C35.1      | 0.82 | -0.06 ( -0.35 - 0.23 )  | 0.99 | -0.01 ( -0.31 - 0.29 ) |
| SM.a.C36.1      | 0.53 | -0.18 ( -0.47 - 0.11 )  | 0.94 | -0.05 ( -0.35 - 0.25 ) |
| SM.a.C37.1      | 0.44 | -0.25 ( -0.54 - 0.04 )  | 0.94 | -0.05 ( -0.35 - 0.24 ) |
| SM.a.C39.1      | 0.36 | -0.3 ( -0.59 - 0 )      | 0.94 | -0.05 ( -0.35 - 0.25 ) |
| SM.a.C41.1      | 0.18 | -0.4 ( -0.69 - -0.11 )  | 0.93 | -0.14 ( -0.44 - 0.17 ) |
| SM.a.C42.1      | 0.76 | -0.08 ( -0.38 - 0.21 )  | 0.94 | -0.09 ( -0.39 - 0.21 ) |
| SM.a.C43.1      | 0.28 | -0.34 ( -0.64 - -0.05 ) | 0.93 | -0.15 ( -0.45 - 0.15 ) |
| SM.a.C32.2      | 0.36 | -0.29 ( -0.58 - 0 )     | 0.94 | -0.08 ( -0.39 - 0.22 ) |
| SM.a.C34.2      | 0.54 | -0.17 ( -0.46 - 0.12 )  | 0.94 | -0.07 ( -0.37 - 0.23 ) |
| SM.a.C36.2      | 0.52 | -0.19 ( -0.48 - 0.11 )  | 0.99 | 0.03 ( -0.28 - 0.33 )  |
| SM.a.C36.3      | 0.75 | -0.09 ( -0.38 - 0.2 )   | 0.99 | -0.02 ( -0.32 - 0.28 ) |
| SM.a.C38.2      | 0.62 | -0.14 ( -0.43 - 0.16 )  | 0.94 | -0.07 ( -0.39 - 0.24 ) |
| SM.a.C38.3      | 0.77 | -0.08 ( -0.37 - 0.22 )  | 0.99 | 0.01 ( -0.29 - 0.32 )  |
| SM.a.C39.2      | 0.08 | -0.54 ( -0.84 - -0.24 ) | 0.94 | 0.05 ( -0.25 - 0.35 )  |
| SM.a.C40.2      | 0.53 | -0.18 ( -0.47 - 0.11 )  | 0.93 | -0.13 ( -0.43 - 0.18 ) |
| SM.a.C40.5      | 0.50 | -0.2 ( -0.49 - 0.1 )    | 0.90 | -0.17 ( -0.48 - 0.14 ) |
| SM.a.C41.2      | 0.50 | -0.2 ( -0.49 - 0.1 )    | 0.93 | -0.11 ( -0.41 - 0.18 ) |
| SM.a.C42.2      | 0.48 | -0.22 ( -0.52 - 0.07 )  | 0.84 | -0.19 ( -0.48 - 0.11 ) |

|                  |      |                        |      |                        |
|------------------|------|------------------------|------|------------------------|
| SM.a.C42.3       | 0.76 | -0.08 ( -0.37 - 0.21 ) | 0.94 | -0.1 ( -0.4 - 0.21 )   |
| SM.a.C42.4       | 0.53 | -0.17 ( -0.47 - 0.12 ) | 0.99 | -0.03 ( -0.33 - 0.27 ) |
| SM.a.C42.6       | 0.54 | -0.17 ( -0.47 - 0.13 ) | 0.94 | -0.1 ( -0.41 - 0.21 )  |
| SM.a.C43.2       | 0.33 | -0.31 ( -0.6 - -0.02 ) | 0.99 | 0 ( -0.31 - 0.3 )      |
| SM.a.C44.6       | 0.52 | -0.2 ( -0.49 - 0.1 )   | 0.94 | -0.06 ( -0.37 - 0.26 ) |
| SM.e.C36.2       | 0.62 | -0.13 ( -0.43 - 0.16 ) | 0.94 | -0.07 ( -0.37 - 0.23 ) |
| SM.e.C38.3       | 0.49 | -0.21 ( -0.5 - 0.08 )  | 0.99 | -0.01 ( -0.31 - 0.29 ) |
| SM.e.C40.5       | 0.76 | -0.08 ( -0.37 - 0.21 ) | 0.94 | -0.11 ( -0.41 - 0.19 ) |
| Carn.a.C2.0      | 0.64 | 0.12 ( -0.17 - 0.42 )  | 0.71 | 0.37 ( 0.08 - 0.66 )   |
| Carn.a.C3.0      | 0.97 | 0.02 ( -0.28 - 0.31 )  | 0.93 | 0.14 ( -0.16 - 0.43 )  |
| Carn.a.C3.0.DC   | 0.70 | -0.11 ( -0.4 - 0.19 )  | 0.94 | 0.07 ( -0.23 - 0.37 )  |
| Carn.a.C4.0      | 0.75 | -0.09 ( -0.39 - 0.21 ) | 0.94 | 0.08 ( -0.22 - 0.39 )  |
| Carn.a.C5.0      | 0.97 | 0.01 ( -0.28 - 0.31 )  | 0.94 | -0.05 ( -0.36 - 0.26 ) |
| Carn.a.C6.0      | 0.97 | -0.01 ( -0.31 - 0.29 ) | 0.84 | 0.25 ( -0.06 - 0.56 )  |
| Carn.a.C6.0.OH   | 0.79 | 0.07 ( -0.22 - 0.35 )  | 0.94 | 0.05 ( -0.25 - 0.35 )  |
| Carn.a.C8.0      | 0.73 | -0.1 ( -0.39 - 0.2 )   | 0.94 | 0.08 ( -0.22 - 0.37 )  |
| Carn.a.C8.1      | 0.62 | -0.13 ( -0.43 - 0.17 ) | 0.90 | -0.17 ( -0.48 - 0.14 ) |
| Carn.a.C9.0      | 0.77 | 0.07 ( -0.22 - 0.37 )  | 0.93 | 0.14 ( -0.16 - 0.45 )  |
| Carn.a.C10.0     | 0.53 | -0.17 ( -0.47 - 0.12 ) | 0.94 | 0.07 ( -0.24 - 0.37 )  |
| Carn.a.C10.1     | 0.77 | 0.07 ( -0.22 - 0.37 )  | 0.84 | 0.2 ( -0.11 - 0.5 )    |
| Carn.a.C12.0     | 0.91 | -0.03 ( -0.32 - 0.26 ) | 0.93 | 0.13 ( -0.18 - 0.43 )  |
| Carn.a.C14.1     | 0.86 | -0.04 ( -0.33 - 0.25 ) | 0.94 | 0.07 ( -0.24 - 0.37 )  |
| Carn.a.C14.2     | 0.71 | 0.1 ( -0.19 - 0.39 )   | 0.84 | 0.21 ( -0.1 - 0.52 )   |
| Carn.a.C15.0     | 0.85 | 0.05 ( -0.24 - 0.35 )  | 0.84 | 0.21 ( -0.09 - 0.52 )  |
| Carn.a.C16.0     | 0.36 | 0.3 ( 0.01 - 0.6 )     | 0.93 | 0.12 ( -0.19 - 0.42 )  |
| Carn.a.C16.0.Oxo | 0.88 | 0.04 ( -0.25 - 0.33 )  | 0.99 | 0.02 ( -0.28 - 0.32 )  |
| Carn.a.C16.1     | 0.58 | 0.15 ( -0.14 - 0.44 )  | 0.84 | 0.21 ( -0.1 - 0.51 )   |
| Carn.a.C16.2     | 0.78 | 0.07 ( -0.22 - 0.36 )  | 0.98 | 0.04 ( -0.27 - 0.34 )  |
| Carn.a.C18.0     | 0.86 | 0.04 ( -0.25 - 0.33 )  | 0.94 | 0.1 ( -0.2 - 0.39 )    |
| Carn.a.C18.1     | 0.53 | 0.17 ( -0.12 - 0.47 )  | 0.99 | 0.02 ( -0.28 - 0.32 )  |
| Carn.a.C18.2     | 0.08 | 0.51 ( 0.22 - 0.8 )    | 0.71 | 0.32 ( 0.01 - 0.62 )   |
| Carn.a.C18.2.OH  | 0.77 | 0.08 ( -0.22 - 0.37 )  | 0.99 | 0.02 ( -0.28 - 0.33 )  |
| Carn.a.C20.0     | 0.86 | 0.04 ( -0.24 - 0.33 )  | 0.94 | 0.09 ( -0.2 - 0.39 )   |
| Carn.a.C20.1     | 0.74 | 0.09 ( -0.2 - 0.39 )   | 0.84 | 0.19 ( -0.1 - 0.49 )   |
| Carn.a.C20.3     | 0.68 | 0.11 ( -0.18 - 0.4 )   | 0.94 | 0.06 ( -0.24 - 0.36 )  |
| Carn.a.C20.4     | 0.75 | 0.08 ( -0.2 - 0.37 )   | 0.84 | 0.19 ( -0.11 - 0.5 )   |
| BCAA             | 0.89 | 0.03 ( -0.26 - 0.33 )  | 0.84 | 0.22 ( -0.09 - 0.52 )  |
| AAA              | 0.88 | -0.04 ( -0.33 - 0.26 ) | 0.93 | 0.12 ( -0.18 - 0.42 )  |
| EAA              | 1.00 | 0 ( -0.29 - 0.29 )     | 0.86 | 0.18 ( -0.12 - 0.49 )  |
| NEAA             | 0.62 | 0.14 ( -0.15 - 0.43 )  | 0.71 | 0.29 ( -0.01 - 0.6 )   |
| AA               | 0.76 | 0.08 ( -0.21 - 0.37 )  | 0.82 | 0.26 ( -0.04 - 0.56 )  |

|                                                                                                                                                                                                                                                                                                                                                                                                                                                                                                                                        |      |                        |      |                        |
|----------------------------------------------------------------------------------------------------------------------------------------------------------------------------------------------------------------------------------------------------------------------------------------------------------------------------------------------------------------------------------------------------------------------------------------------------------------------------------------------------------------------------------------|------|------------------------|------|------------------------|
| SATURATEDNEFA                                                                                                                                                                                                                                                                                                                                                                                                                                                                                                                          | 0.74 | -0.09 ( -0.39 - 0.2 )  | 0.84 | 0.23 ( -0.08 - 0.53 )  |
| MONOUNSATNEFA                                                                                                                                                                                                                                                                                                                                                                                                                                                                                                                          | 0.38 | -0.28 ( -0.57 - 0.01 ) | 0.94 | 0.07 ( -0.23 - 0.37 )  |
| POLYUNSATNEFA                                                                                                                                                                                                                                                                                                                                                                                                                                                                                                                          | 0.49 | -0.21 ( -0.5 - 0.08 )  | 0.93 | 0.12 ( -0.18 - 0.42 )  |
| NEFA                                                                                                                                                                                                                                                                                                                                                                                                                                                                                                                                   | 0.52 | -0.18 ( -0.48 - 0.11 ) | 0.93 | 0.15 ( -0.15 - 0.45 )  |
| SATURATEDPCaa                                                                                                                                                                                                                                                                                                                                                                                                                                                                                                                          | 0.38 | -0.29 ( -0.59 - 0.01 ) | 0.93 | -0.13 ( -0.44 - 0.18 ) |
| MONOUNSATPCaa                                                                                                                                                                                                                                                                                                                                                                                                                                                                                                                          | 0.52 | -0.19 ( -0.49 - 0.11 ) | 0.99 | 0.02 ( -0.28 - 0.32 )  |
| POLYUNSATPCaa                                                                                                                                                                                                                                                                                                                                                                                                                                                                                                                          | 0.54 | -0.17 ( -0.46 - 0.12 ) | 0.99 | 0 ( -0.31 - 0.3 )      |
| PCaa                                                                                                                                                                                                                                                                                                                                                                                                                                                                                                                                   | 0.53 | -0.18 ( -0.47 - 0.11 ) | 0.99 | 0 ( -0.31 - 0.3 )      |
| SATURATEDPCae                                                                                                                                                                                                                                                                                                                                                                                                                                                                                                                          | 0.41 | -0.26 ( -0.56 - 0.03 ) | 0.94 | -0.05 ( -0.35 - 0.26 ) |
| MONOUNSATPCae                                                                                                                                                                                                                                                                                                                                                                                                                                                                                                                          | 0.41 | -0.27 ( -0.57 - 0.03 ) | 0.93 | -0.14 ( -0.44 - 0.16 ) |
| POLYUNSATPCae                                                                                                                                                                                                                                                                                                                                                                                                                                                                                                                          | 0.48 | -0.22 ( -0.51 - 0.08 ) | 0.93 | -0.15 ( -0.45 - 0.15 ) |
| PCae                                                                                                                                                                                                                                                                                                                                                                                                                                                                                                                                   | 0.45 | -0.24 ( -0.54 - 0.05 ) | 0.93 | -0.14 ( -0.44 - 0.16 ) |
| SATURATEDLYSOPCa                                                                                                                                                                                                                                                                                                                                                                                                                                                                                                                       | 0.54 | 0.17 ( -0.13 - 0.46 )  | 0.94 | 0.08 ( -0.22 - 0.39 )  |
| MONOUNSATLYSOPCa                                                                                                                                                                                                                                                                                                                                                                                                                                                                                                                       | 0.54 | -0.17 ( -0.48 - 0.13 ) | 0.99 | -0.03 ( -0.34 - 0.28 ) |
| POLYUNSATLYSOPCa                                                                                                                                                                                                                                                                                                                                                                                                                                                                                                                       | 0.62 | -0.14 ( -0.44 - 0.16 ) | 0.94 | 0.11 ( -0.2 - 0.42 )   |
| LYSOPCa                                                                                                                                                                                                                                                                                                                                                                                                                                                                                                                                | 0.86 | 0.05 ( -0.25 - 0.34 )  | 0.94 | 0.08 ( -0.23 - 0.39 )  |
| SATURATEDLYSOPCe                                                                                                                                                                                                                                                                                                                                                                                                                                                                                                                       | 0.45 | -0.22 ( -0.52 - 0.07 ) | 0.93 | -0.13 ( -0.43 - 0.17 ) |
| lyso.PC.e.C18.1                                                                                                                                                                                                                                                                                                                                                                                                                                                                                                                        | 0.57 | -0.16 ( -0.45 - 0.14 ) | 0.99 | -0.01 ( -0.31 - 0.29 ) |
| LYSOPCe                                                                                                                                                                                                                                                                                                                                                                                                                                                                                                                                | 0.45 | -0.22 ( -0.51 - 0.07 ) | 0.93 | -0.12 ( -0.42 - 0.18 ) |
| MONOUNSATSM                                                                                                                                                                                                                                                                                                                                                                                                                                                                                                                            | 0.50 | -0.2 ( -0.5 - 0.09 )   | 0.93 | -0.11 ( -0.41 - 0.19 ) |
| POLYUNSATSM                                                                                                                                                                                                                                                                                                                                                                                                                                                                                                                            | 0.50 | -0.2 ( -0.49 - 0.09 )  | 0.93 | -0.12 ( -0.42 - 0.19 ) |
| SM                                                                                                                                                                                                                                                                                                                                                                                                                                                                                                                                     | 0.50 | -0.2 ( -0.5 - 0.09 )   | 0.93 | -0.12 ( -0.42 - 0.19 ) |
| Carn                                                                                                                                                                                                                                                                                                                                                                                                                                                                                                                                   | 0.44 | 0.25 ( -0.05 - 0.54 )  | 0.71 | 0.34 ( 0.05 - 0.63 )   |
| SHORTCHAINCARNa                                                                                                                                                                                                                                                                                                                                                                                                                                                                                                                        | 0.71 | 0.1 ( -0.19 - 0.4 )    | 0.71 | 0.34 ( 0.05 - 0.64 )   |
| MEDIUMCHAINCARNa                                                                                                                                                                                                                                                                                                                                                                                                                                                                                                                       | 0.83 | -0.06 ( -0.35 - 0.24 ) | 0.93 | 0.12 ( -0.19 - 0.42 )  |
| LONGCHAINCARNa                                                                                                                                                                                                                                                                                                                                                                                                                                                                                                                         | 0.50 | 0.2 ( -0.1 - 0.49 )    | 0.93 | 0.15 ( -0.15 - 0.46 )  |
| ACYLCARN                                                                                                                                                                                                                                                                                                                                                                                                                                                                                                                               | 0.70 | 0.11 ( -0.18 - 0.4 )   | 0.71 | 0.32 ( 0.03 - 0.62 )   |
| Values represent absolute differences in SRS score and corresponding p-values from linear regression models that reflect the difference in SRS score at age 6 and 13 per SDS increase in cord-blood metabolite concentrations (μmol/L). Model includes sex and age at outcome. AA amino acids, NEFA non-esterified fatty acids, PC.aa diacyl-phosphatidylcholines, PC.ae acyl-alkyl-phosphatidylcholines, lyso.PC.a. acyl-lysophosphatidylcholines, lyso.PC.e alkyl-lysophosphatidylcholines, Carn.a acylcarnitines, SM sphingomyelins |      |                        |      |                        |

**Supplemental Table S6.** Associations of cord blood metabolite ratios with SRS scores at age 6 and 13. Basic model.

| Metabolite ratios                         | Difference in SRS score age 6 |                            | Difference in SRS score age 13 |                            |
|-------------------------------------------|-------------------------------|----------------------------|--------------------------------|----------------------------|
|                                           | P-value                       | Estimate<br>(95%-Interval) | P-value                        | Estimate<br>(95%-Interval) |
| Asn/Asp                                   | 0.33                          | -0.22 ( -0.51 - 0.07 )     | 0.76                           | -0.11 ( -0.4 - 0.18 )      |
| Gln/Glu                                   | 0.54                          | -0.14 ( -0.44 - 0.15 )     | 0.66                           | -0.16 ( -0.46 - 0.14 )     |
| NEFA.18:1/18:0                            | 0.20                          | -0.3 ( -0.59 - -0.02 )     | 0.51                           | -0.25 ( -0.55 - 0.05 )     |
| NEFA.16:1/16:0                            | 0.02                          | -0.55 ( -0.83 - -0.26 )    | 0.40                           | -0.38 ( -0.69 - -0.08 )    |
| Carn.a.16.0/free carnitine                | 0.26                          | 0.28 ( -0.02 - 0.58 )      | 0.33                           | 0.46 ( 0.16 - 0.76 )       |
| Carn.a.C:2/C:16                           | 0.11                          | 0.38 ( 0.08 - 0.67 )       | 0.63                           | 0.18 ( -0.12 - 0.47 )      |
| $\sum$ Lyso.PC.a/ $\sum$ PC.aa            | 0.06                          | 0.45 ( 0.15 - 0.74 )       | 0.70                           | 0.15 ( -0.15 - 0.44 )      |
| (Lyso.PC.a.C:18.1 + C:18.2)/ $\sum$ PC.aa | 0.43                          | 0.18 ( -0.11 - 0.48 )      | 0.54                           | 0.22 ( -0.07 - 0.52 )      |
| (Lyso.PC.a.C:16.0 + C:18.0)/ $\sum$ PC.aa | 0.81                          | -0.06 ( -0.35 - 0.23 )     | 0.40                           | -0.32 ( -0.61 - -0.03 )    |
| Val/PC.ae.C:32.2                          | 0.81                          | -0.06 ( -0.36 - 0.24 )     | 0.40                           | 0.34 ( 0.04 - 0.63 )       |
| $\sum$ PC.aa/ $\sum$ PC.ae                | 0.11                          | 0.37 ( 0.08 - 0.66 )       | 0.40                           | 0.36 ( 0.07 - 0.66 )       |

**Supplemental(1) Table S7.** Associations of cord blood metabolite ratios with SRS scores at age 6 and 13. Main model.

| Metabolite ratios                         | Difference in SRS score age 6 |                            | Difference in SRS score age 13 |                            |
|-------------------------------------------|-------------------------------|----------------------------|--------------------------------|----------------------------|
|                                           | P-value                       | Estimate<br>(95%-Interval) | P-value                        | Estimate<br>(95%-Interval) |
| Asn/Asp                                   | 0.43                          | -0.24 ( -0.53 - 0.04 )     | 0.89                           | -0.11 ( -0.4 - 0.18 )      |
| Gln/Glu                                   | 0.62                          | -0.13 ( -0.42 - 0.16 )     | 0.89                           | -0.12 ( -0.42 - 0.17 )     |
| NEFA.18:1/18:0                            | 0.37                          | -0.28 ( -0.56 - 0.01 )     | 0.75                           | -0.26 ( -0.56 - 0.04 )     |
| NEFA.16:1/16:0                            | 0.08                          | -0.48 ( -0.77 - -0.19 )    | 0.69                           | -0.32 ( -0.63 - -0.01 )    |
| Carn.a.16.0/free carnitine                | 0.51                          | 0.2 ( -0.1 - 0.49 )        | 0.69                           | 0.36 ( 0.06 - 0.67 )       |
| Carn.a.C:2/C:16                           | 0.37                          | 0.28 ( -0.02 - 0.58 )      | 0.89                           | 0.1 ( -0.19 - 0.4 )        |
| $\sum$ Lyso.PC.a/ $\sum$ PC.aa            | 0.18                          | 0.41 ( 0.12 - 0.7 )        | 0.89                           | 0.11 ( -0.19 - 0.4 )       |
| (Lyso.PC.a.C:18.1 + C:18.2)/ $\sum$ PC.aa | 0.97                          | 0.01 ( -0.3 - 0.32 )       | 0.90                           | 0.09 ( -0.22 - 0.4 )       |
| (Lyso.PC.a.C:16.0 + C:18.0)/ $\sum$ PC.aa | 0.97                          | -0.01 ( -0.3 - 0.28 )      | 0.75                           | -0.26 ( -0.55 - 0.03 )     |
| Val/PC.ae.C:32.2                          | 0.73                          | -0.1 ( -0.39 - 0.2 )       | 0.69                           | 0.31 ( 0.02 - 0.61 )       |
| $\sum$ PC.aa/ $\sum$ PC.ae                | 0.24                          | 0.36 ( 0.07 - 0.65 )       | 0.69                           | 0.33 ( 0.03 - 0.63 )       |

**Supplemental Table S8.** Associations of cord blood metabolite ratios with SRS scores at age 6 and 13. Adjusted model.

| Metabolite ratios                         | Difference in SRS score age 6 |                            | Difference in SRS score age 13 |                            |
|-------------------------------------------|-------------------------------|----------------------------|--------------------------------|----------------------------|
|                                           | P-value                       | Estimate<br>(95%-Interval) | P-value                        | Estimate<br>(95%-Interval) |
| Asn/Asp                                   | 0.44                          | -0.24 ( -0.53 - 0.04 )     | 0.94                           | -0.1 ( -0.4 - 0.19 )       |
| Gln/Glu                                   | 0.62                          | -0.13 ( -0.42 - 0.16 )     | 0.93                           | -0.11 ( -0.41 - 0.19 )     |
| NEFA.18:1/18:0                            | 0.38                          | -0.28 ( -0.57 - 0 )        | 0.82                           | -0.26 ( -0.56 - 0.04 )     |
| NEFA.16:1/16:0                            | 0.08                          | -0.48 ( -0.77 - -0.19 )    | 0.71                           | -0.32 ( -0.63 - -0.01 )    |
| Carn.a.16.0/free carnitine                | 0.52                          | 0.19 ( -0.1 - 0.49 )       | 0.71                           | 0.36 ( 0.06 - 0.66 )       |
| Carn.a.C:2/C:16                           | 0.38                          | 0.28 ( -0.02 - 0.58 )      | 0.94                           | 0.09 ( -0.2 - 0.39 )       |
| $\sum$ Lyso.PC.a/ $\sum$ PC.aa            | 0.18                          | 0.41 ( 0.12 - 0.7 )        | 0.94                           | 0.1 ( -0.2 - 0.39 )        |
| (Lyso.PC.a.C:18.1 + C:18.2)/ $\sum$ PC.aa | 0.97                          | 0.01 ( -0.3 - 0.32 )       | 0.94                           | 0.08 ( -0.23 - 0.39 )      |
| (Lyso.PC.a.C:16.0 + C:18.0)/ $\sum$ PC.aa | 0.98                          | -0.01 ( -0.3 - 0.28 )      | 0.82                           | -0.25 ( -0.54 - 0.03 )     |
| Val/PC.ae.C:32.2                          | 0.75                          | -0.09 ( -0.39 - 0.2 )      | 0.71                           | 0.31 ( 0.01 - 0.6 )        |
| $\sum$ PC.aa/ $\sum$ PC.ae                | 0.24                          | 0.36 ( 0.07 - 0.65 )       | 0.71                           | 0.32 ( 0.02 - 0.62 )       |



**Supplemental Table S9.** P-values for interaction effects of linear mixed-effects models.

| <b>Metabolite</b> | <b>inter_p</b> | <b>fdr_inter_p</b> |
|-------------------|----------------|--------------------|
| Ala               | 0.08           | 0.83               |
| Arg               | 0.09           | 0.88               |
| Asn               | 0.05           | 0.69               |
| Asp               | 0.31           | 1.00               |
| Cit               | 0.37           | 1.00               |
| Gln               | 0.57           | 1.00               |
| Glu               | 0.94           | 1.00               |
| Gly               | 0.50           | 1.00               |
| His               | 0.21           | 1.00               |
| Ile               | 0.80           | 1.00               |
| Leu               | 0.33           | 1.00               |
| Lys               | 0.80           | 1.00               |
| Met               | 0.03           | 0.69               |
| Orn               | 0.94           | 1.00               |
| Phe               | 0.35           | 1.00               |
| Pro               | 0.44           | 1.00               |
| Trp               | 0.36           | 1.00               |
| Ser               | 0.70           | 1.00               |
| Thr               | 0.23           | 1.00               |
| Tyr               | 0.41           | 1.00               |
| Val               | 0.22           | 1.00               |
| Cys               | 0.93           | 1.00               |
| NEFA_14_0         | 0.01           | 0.69               |
| NEFA_15_0         | 0.05           | 0.69               |
| NEFA_16_0         | 0.04           | 0.69               |
| NEFA_17_0         | 0.06           | 0.71               |
| NEFA_18_0         | 0.16           | 1.00               |
| NEFA_24_0         | 0.05           | 0.69               |
| NEFA_26_0         | 0.10           | 0.89               |
| NEFA_14_1         | 0.03           | 0.69               |
| NEFA_16_1         | 0.10           | 0.89               |
| NEFA_17_1         | 0.09           | 0.84               |
| NEFA_18_1         | 0.04           | 0.69               |
| NEFA_19_1         | 0.02           | 0.69               |
| NEFA_20_1         | 0.32           | 1.00               |
| NEFA_24_1         | 0.08           | 0.83               |
| NEFA_26_1         | 0.17           | 1.00               |
| NEFA_16_2         | 0.05           | 0.69               |
| NEFA_17_2         | 0.22           | 1.00               |

|             |      |      |
|-------------|------|------|
| NEFA_18_2   | 0.05 | 0.69 |
| NEFA_18_3   | 0.07 | 0.78 |
| NEFA_20_2   | 0.11 | 0.91 |
| NEFA_20_3   | 0.30 | 1.00 |
| NEFA_20_4   | 0.20 | 1.00 |
| NEFA_20_5   | 0.75 | 1.00 |
| NEFA_22_3   | 0.29 | 1.00 |
| NEFA_22_4   | 0.15 | 1.00 |
| NEFA_22_5   | 0.28 | 1.00 |
| NEFA_22_6   | 0.19 | 1.00 |
| NEFA_24_2   | 0.02 | 0.69 |
| NEFA_24_4   | 0.24 | 1.00 |
| NEFA_24_5   | 0.18 | 1.00 |
| NEFA_26_2   | 0.23 | 1.00 |
| PC.aa.C30.0 | 0.26 | 1.00 |
| PC.aa.C32.0 | 0.74 | 1.00 |
| PC.aa.C36.0 | 0.83 | 1.00 |
| PC.aa.C38.0 | 0.75 | 1.00 |
| PC.aa.C40.0 | 0.81 | 1.00 |
| PC.aa.C42.0 | 0.30 | 1.00 |
| PC.aa.C32.1 | 0.77 | 1.00 |
| PC.aa.C34.1 | 0.95 | 1.00 |
| PC.aa.C36.1 | 0.62 | 1.00 |
| PC.aa.C40.1 | 0.42 | 1.00 |
| PC.aa.C30.3 | 0.53 | 1.00 |
| PC.aa.C32.2 | 0.00 | 0.69 |
| PC.aa.C32.3 | 0.66 | 1.00 |
| PC.aa.C34.2 | 0.69 | 1.00 |
| PC.aa.C34.3 | 0.73 | 1.00 |
| PC.aa.C34.4 | 0.99 | 1.00 |
| PC.aa.C34.5 | 0.12 | 1.00 |
| PC.aa.C36.2 | 0.61 | 1.00 |
| PC.aa.C36.3 | 0.92 | 1.00 |
| PC.aa.C36.4 | 0.98 | 1.00 |
| PC.aa.C36.5 | 0.43 | 1.00 |
| PC.aa.C36.6 | 0.50 | 1.00 |
| PC.aa.C38.2 | 0.43 | 1.00 |
| PC.aa.C38.3 | 0.71 | 1.00 |
| PC.aa.C38.4 | 0.87 | 1.00 |
| PC.aa.C38.5 | 0.72 | 1.00 |
| PC.aa.C38.6 | 0.82 | 1.00 |
| PC.aa.C40.2 | 0.39 | 1.00 |

|                 |      |      |
|-----------------|------|------|
| PC.aa.C40.3     | 0.70 | 1.00 |
| PC.aa.C40.4     | 0.94 | 1.00 |
| PC.aa.C40.5     | 0.74 | 1.00 |
| PC.aa.C40.6     | 0.99 | 1.00 |
| PC.aa.C42.5     | 0.80 | 1.00 |
| PC.aa.C43.6     | 0.45 | 1.00 |
| PC.aa.C44.12    | 0.46 | 1.00 |
| PC.ae.C30.0     | 0.55 | 1.00 |
| PC.ae.C32.0     | 0.59 | 1.00 |
| PC.ae.C34.0     | 0.83 | 1.00 |
| PC.ae.C36.0     | 0.70 | 1.00 |
| PC.ae.C38.0     | 0.86 | 1.00 |
| PC.ae.C40.0     | 0.32 | 1.00 |
| PC.ae.C32.1     | 0.70 | 1.00 |
| PC.ae.C34.1     | 0.89 | 1.00 |
| PC.ae.C36.1     | 0.21 | 1.00 |
| PC.ae.C40.1     | 0.40 | 1.00 |
| PC.ae.C42.1     | 1.00 | 1.00 |
| PC.ae.C32.2     | 0.79 | 1.00 |
| PC.ae.C34.2     | 0.89 | 1.00 |
| PC.ae.C34.3     | 0.46 | 1.00 |
| PC.ae.C34.4     | 0.75 | 1.00 |
| PC.ae.C36.2     | 0.79 | 1.00 |
| PC.ae.C36.3     | 0.78 | 1.00 |
| PC.ae.C36.4     | 0.88 | 1.00 |
| PC.ae.C36.5     | 0.47 | 1.00 |
| PC.ae.C38.2     | 0.53 | 1.00 |
| PC.ae.C38.3     | 0.75 | 1.00 |
| PC.ae.C38.4     | 0.77 | 1.00 |
| PC.ae.C38.5     | 0.88 | 1.00 |
| PC.ae.C38.6     | 1.00 | 1.00 |
| PC.ae.C40.2     | 0.61 | 1.00 |
| PC.ae.C40.3     | 0.22 | 1.00 |
| PC.ae.C40.4     | 0.46 | 1.00 |
| PC.ae.C40.5     | 0.72 | 1.00 |
| PC.ae.C40.6     | 0.36 | 1.00 |
| PC.ae.C42.3     | 0.56 | 1.00 |
| PC.ae.C42.4     | 0.33 | 1.00 |
| PC.ae.C42.5     | 0.90 | 1.00 |
| PC.ae.C42.6     | 0.78 | 1.00 |
| lyso.PC.a.C14.0 | 0.55 | 1.00 |
| lyso.PC.a.C16.0 | 0.28 | 1.00 |

|                 |      |      |
|-----------------|------|------|
| lyso.PC.a.C18.0 | 0.60 | 1.00 |
| lyso.PC.a.C16.1 | 0.49 | 1.00 |
| lyso.PC.a.C18.1 | 0.70 | 1.00 |
| lyso.PC.a.C18.2 | 0.60 | 1.00 |
| lyso.PC.a.C18.3 | 0.64 | 1.00 |
| lyso.PC.a.C20.3 | 0.81 | 1.00 |
| lyso.PC.a.C20.4 | 0.62 | 1.00 |
| lyso.PC.a.C20.5 | 0.30 | 1.00 |
| lyso.PC.a.C22.6 | 0.72 | 1.00 |
| lyso.PC.e.C16.0 | 0.30 | 1.00 |
| lyso.PC.e.C18.0 | 0.49 | 1.00 |
| lyso.PC.e.C18.1 | 1.00 | 1.00 |
| SM.a.C30.1      | 0.61 | 1.00 |
| SM.a.C32.1      | 0.93 | 1.00 |
| SM.a.C33.1      | 0.75 | 1.00 |
| SM.a.C34.1      | 0.70 | 1.00 |
| SM.a.C35.1      | 0.71 | 1.00 |
| SM.a.C36.1      | 0.82 | 1.00 |
| SM.a.C37.1      | 0.18 | 1.00 |
| SM.a.C39.1      | 0.30 | 1.00 |
| SM.a.C41.1      | 0.58 | 1.00 |
| SM.a.C42.1      | 0.61 | 1.00 |
| SM.a.C43.1      | 0.31 | 1.00 |
| SM.a.C32.2      | 0.79 | 1.00 |
| SM.a.C34.2      | 0.87 | 1.00 |
| SM.a.C36.2      | 0.79 | 1.00 |
| SM.a.C36.3      | 0.35 | 1.00 |
| SM.a.C38.2      | 0.75 | 1.00 |
| SM.a.C38.3      | 0.51 | 1.00 |
| SM.a.C39.2      | 0.02 | 0.69 |
| SM.a.C40.2      | 0.91 | 1.00 |
| SM.a.C40.5      | 0.29 | 1.00 |
| SM.a.C41.2      | 0.61 | 1.00 |
| SM.a.C42.2      | 0.63 | 1.00 |
| SM.a.C42.3      | 0.52 | 1.00 |
| SM.a.C42.4      | 0.91 | 1.00 |
| SM.a.C42.6      | 0.95 | 1.00 |
| SM.a.C43.2      | 0.56 | 1.00 |
| SM.a.C44.6      | 0.52 | 1.00 |
| SM.e.C36.2      | 0.60 | 1.00 |
| SM.e.C38.3      | 0.33 | 1.00 |
| SM.e.C40.5      | 0.41 | 1.00 |

|                  |      |      |
|------------------|------|------|
| Carn.a.C2.0      | 0.18 | 1.00 |
| Carn.a.C3.0      | 0.92 | 1.00 |
| Carn.a.C3.0.DC   | 0.70 | 1.00 |
| Carn.a.C4.0      | 0.54 | 1.00 |
| Carn.a.C5.0      | 0.14 | 1.00 |
| Carn.a.C6.0      | 0.26 | 1.00 |
| Carn.a.C6.0.OH   | 0.89 | 1.00 |
| Carn.a.C8.0      | 0.23 | 1.00 |
| Carn.a.C8.1      | 0.51 | 1.00 |
| Carn.a.C9.0      | 0.82 | 1.00 |
| Carn.a.C10.0     | 0.19 | 1.00 |
| Carn.a.C10.1     | 0.84 | 1.00 |
| Carn.a.C12.0     | 0.91 | 1.00 |
| Carn.a.C14.1     | 0.89 | 1.00 |
| Carn.a.C14.2     | 0.94 | 1.00 |
| Carn.a.C15.0     | 0.73 | 1.00 |
| Carn.a.C16.0     | 0.34 | 1.00 |
| Carn.a.C16.0.Oxo | 0.51 | 1.00 |
| Carn.a.C16.1     | 0.82 | 1.00 |
| Carn.a.C16.2     | 0.38 | 1.00 |
| Carn.a.C18.0     | 0.78 | 1.00 |
| Carn.a.C18.1     | 0.48 | 1.00 |
| Carn.a.C18.2     | 0.26 | 1.00 |
| Carn.a.C18.2.OH  | 0.44 | 1.00 |
| Carn.a.C20.0     | 0.91 | 1.00 |
| Carn.a.C20.1     | 0.98 | 1.00 |
| Carn.a.C20.3     | 0.36 | 1.00 |
| Carn.a.C20.4     | 0.62 | 1.00 |
| BCAA             | 0.30 | 1.00 |
| AAA              | 0.32 | 1.00 |
| EAA              | 0.31 | 1.00 |
| NEAA             | 0.21 | 1.00 |
| AA               | 0.22 | 1.00 |
| SATURATEDNEFA    | 0.03 | 0.69 |
| MONOUNSATNEFA    | 0.04 | 0.69 |
| POLYUNSATNEFA    | 0.06 | 0.69 |
| NEFA             | 0.03 | 0.69 |
| SATURATEDPCaa    | 0.98 | 1.00 |
| MONOUNSATPCaa    | 0.94 | 1.00 |
| POLYUNSATPCaa    | 0.84 | 1.00 |
| PCaa             | 0.86 | 1.00 |
| SATURATEDPCae    | 0.60 | 1.00 |

|                           |      |      |
|---------------------------|------|------|
| MONOUNSATPCae             | 0.58 | 1.00 |
| POLYUNSATPCae             | 0.99 | 1.00 |
| PCae                      | 0.98 | 1.00 |
| SATURATEDLYSOPCa          | 0.32 | 1.00 |
| MONOUNSATLYSOPCa          | 0.62 | 1.00 |
| POLYUNSATLYSOPCa          | 0.67 | 1.00 |
| LYSOPCa                   | 0.56 | 1.00 |
| SATURATEDLYSOPCe          | 0.96 | 1.00 |
| lyso.PC.e.C18.1           | 1.00 | 1.00 |
| LYSOPCe                   | 0.98 | 1.00 |
| MONOUNSATSM               | 0.79 | 1.00 |
| POLYUNSATSM               | 0.77 | 1.00 |
| SM                        | 0.77 | 1.00 |
| Carn                      | 0.65 | 1.00 |
| SHORTCHAINCARNa           | 0.24 | 1.00 |
| MEDIUMCHAINCARNa          | 0.55 | 1.00 |
| LONGCHAINCARNa            | 0.51 | 1.00 |
| ACYLCARN                  | 0.32 | 1.00 |
| Asn_Asp                   | 0.78 | 1.00 |
| Gln_Glu                   | 0.94 | 1.00 |
| NEFA_18_1_NEFA_18_0       | 0.76 | 1.00 |
| NEFA_16_1_NEFA_16_0       | 0.87 | 1.00 |
| PC.aa_PC.ae               | 0.71 | 1.00 |
| Lyso.PC.a_Lyso.PC.aa      | 0.38 | 1.00 |
| LysoPC.a.C16.0C18.0_PCaa  | 0.21 | 1.00 |
| LysoPC.a.C18.1C18.2_PCaa  | 0.94 | 1.00 |
| Carn.a.C16.0_freeCarn     | 0.24 | 1.00 |
| Carn.a.C2.0_Carn.a.C.16.0 | 0.03 | 0.69 |
| Val_PCae.C.32.2           | 0.28 | 1.00 |

## Supplementary Figure S1.

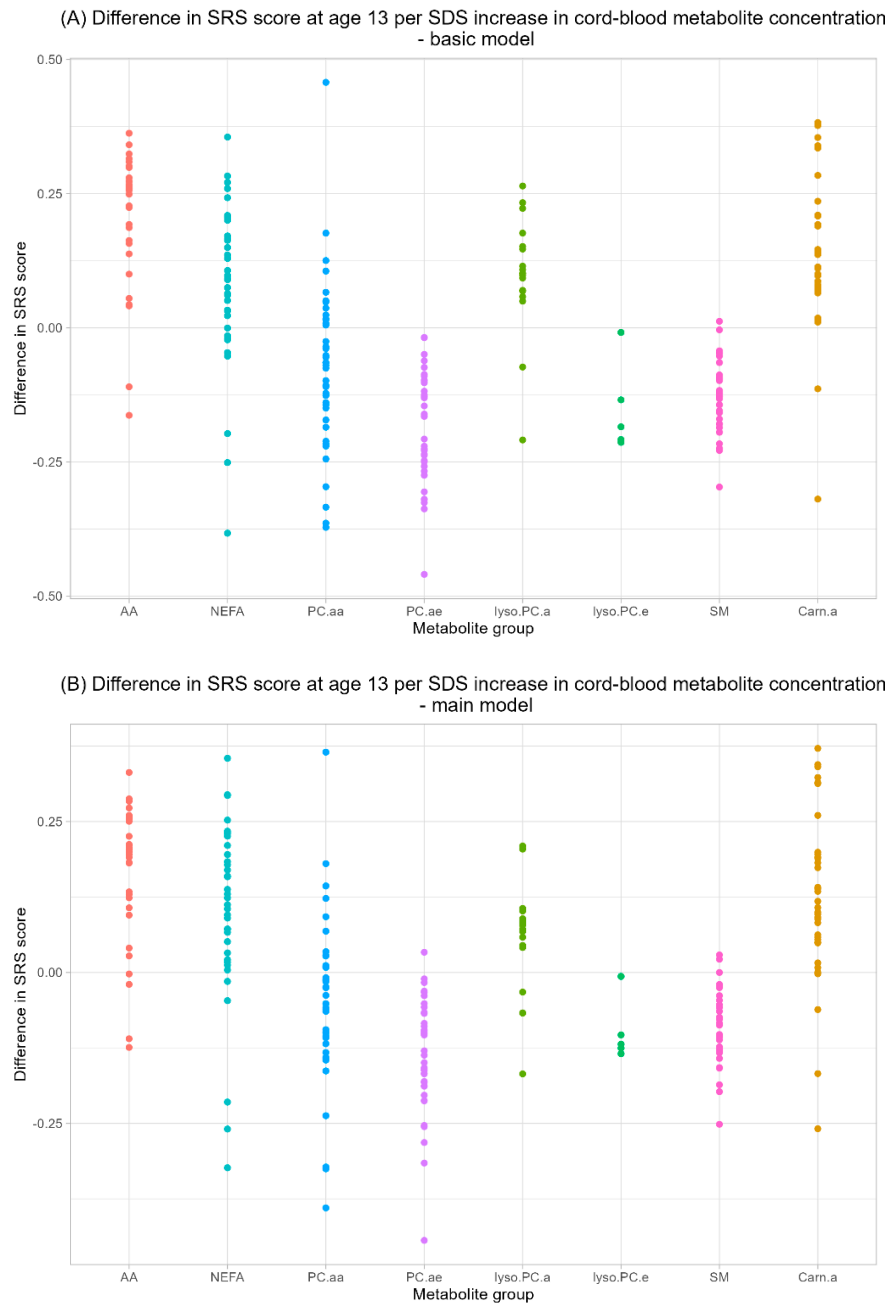

**Supplementary Figure S1.** Associations of individual cord-blood metabolites with SRS scores at the age of 13 years. (A) basic model, (B) adjusted model. Values represent the estimated change in the (A) is adjusted for sex and age at outcome, (B) adjusted for sex, age at outcome, maternal BMI, maternal psychopathologies, education level, smoking during pregnancy, alcohol intake during pregnancy, gestational age at birth, birthweight. Labeled values represent significant associations (FDR-adjusted p-values < 0.05). Corresponding numerical values are shown in Table S4. AA amino acids, NEFA non-esterified fatty acids, PC.aa diacyl-phosphatidylcholines, PC.ae acyl-alkyl-phosphatidylcholines, lyso.PC.a. acyl-lysophosphatidylcholines, lyso.PC.e alkyl-lysophosphatidylcholines, Carn.a acylcarnitines, SM sphingomyelins.

### Supplemental Text S1. Methods for cord blood metabolite measurements

A targeted metabolomics approach was adopted to determine serum concentrations ( $\mu\text{mol/L}$ ) of AA, NEFA, PL and Carn, as described previously (1). Proteins of 50  $\mu\text{L}$  serum were precipitated by adding 450  $\mu\text{L}$  methanol including internal standards: labeled amino acid standards set A (NSK-A-1, Cambridge Isotope Laboratories (CIL), USA),  $^{15}\text{N}_2$ -L-asparagine (NLM-3286-0.25, CIL, USA), indole-D5-L-tryptophan (DLM-1092-0.5, CIL, USA), U- $^{13}\text{C}_{16}$ -palmitic acid (CLM-409-MPT-PK, CIL, USA), D3-acetyl-carnitine (DLM-754-PK, CIL, USA), D3-octanoyl-carnitine (DLM-755-0.01, CIL, USA) and D3-palmitoyl-carnitine (DLM-1263-0.01, CIL, USA), tridecanoyl-2-hydroxy-sn-glycero-3-phosphocholine (855476, Avanti Polar Lipids, USA) and 1,2-dimyristoyl-sn-glycero-3-phosphocholine (850345, Avanti Polar Lipids, USA). If sample volume was less than optimal, the concentrations were corrected by the respective factor. Sample volumes less than 25  $\mu\text{L}$  were not used and considered missing. After centrifugation the supernatant was split into aliquots. AA were analyzed by liquid chromatography tandem mass spectrometry (LC-MS/MS) as described previously (2). An aliquot of the supernatant was used for the derivatization to AA butylester with hydrochloric acid in 1-butanol. After evaporation, the residues were dissolved in water/methanol (80:20; (v/v)) with 0.1% formic acid. The samples were analyzed with 1100 high-performance liquid chromatography (HPLC) system (Agilent, Waldbronn, Germany) equipped with 150 x 2.1 mm, 3.5  $\mu\text{m}$  particle size C18 HPLC column (X-Bridge, Waters, Milford, USA) and 0.1% heptafluorobutyric acid as and ion pair reagent in the mobile phases A and B (A: water, B: methanol). Mass spectrometric (MS) detection was performed with an API2000 tandem mass spectrometer (AB Sciex, Darmstadt, Germany) equipped with an atmospheric pressure chemical ionization (APCI) source operating in positive ion ionization mode. IUPAC-IUB Nomenclature was used for notation of the AA (1984).

NEFA, PL and Carn were measured with a 1200 SL HPLC system (Agilent, Waldbronn, Germany) coupled to a 4000QTRAP tandem mass spectrometer from AB Sciex (Darmstadt, Germany) (Hellmuth et al. 2012; Uhl et al. 2016)(3, 4). NEFA were analyzed by injection of the supernatant to a LC-MS/MS operating in negative electrospray ionization (ESI) mode where they were separated by gradient elution on a 100 x 3.0 mm, 1.9  $\mu\text{m}$  particle size Purusuit UPS Diphenyl column from Varian (Darmstadt, Germany) using 5 mM ammonium acetate in water as mobile phase A and acetonitrile/isopropanol (80:20; (v/v)) as mobile phase B. NEFA species were quantified using GLC-85 reference standard mixture (Nu-Chek Prep, USA). PL were analyzed by flow-injection analysis (FIA) with LC-MS/MS coupled with ESI (Rauschert et al. 2016)(5). The system was run in positive ionization mode with 5% water in isopropanol as mobile phase A and 5% water in methanol as mobile phase B. The



analysis was performed for diacyl-phosphatidylcholines (PC.aa), acyl-alkyl-phosphatidylcholines (PC.ae), acyl-lysophosphatidylcholines (Lyso.PC.a), alkyl-lysophosphatidylcholines (Lyso.PC.e) and sphingomyelins (SM)). Carn (Free carnitine (Free Carn) and acyl-carnitines (Carn.a)) were analyzed by flow-injection analysis of the supernatant into a LC-MS/MS system using an isocratic elution with 76% isopropanol, 19% methanol and 5% water. The mass spectrometer was equipped with electrospray ionization and operated in positive ionization mode. PL and acyl-carn were quantified using aliquots of a commercial available lyophilized control plasma (ClinChek®, Recipe, Germany), where the concentrations have been determined by AbsoluteIDQ p150 Kit from Biocrates®, a previously published LC-MS/MS method (Uhl et al. 2011)(6) and by in-house quantification with various standards. The analytical technique used is capable of determining the total number of total bonds, but not the position of the double bonds and the distribution of the carbon atoms between fatty acid side chains. We used the following notation for NEFA, PL and Carn.a: X:Y, where X denotes the length of the carbon chain, and Y the number of double bonds. The ‘a’ denotes an acyl chain bound to the backbone via an ester bond (‘acyl-’) and the ‘e’ represents an ether bond (‘alkyl-’).

**Supplemental Table S10. Parameters for mass-spectrometry detection and identifications**

| Parameters for mass-spectrometry detection and identification for amino-acids and non-esterified fatty acids, including the labelled internal standards . |            |         |       |    |    |     |        |              |
|-----------------------------------------------------------------------------------------------------------------------------------------------------------|------------|---------|-------|----|----|-----|--------|--------------|
| ID*                                                                                                                                                       | Rt minutes | Q1      | Q3    | DP | CE | CXP | Adduct | MSI ID Level |
| <b>Amino acids</b>                                                                                                                                        |            |         |       |    |    |     |        |              |
| Ala1                                                                                                                                                      | 7,6        | 146,182 | 44    | 11 | 25 | 4   | (M+H)+ | 1            |
| Ala2                                                                                                                                                      | 7,6        | 146,182 | 90    | 11 | 13 | 12  | (M+H)+ | 1            |
| AlaIS                                                                                                                                                     | 7,6        | 150,168 | 48,1  | 31 | 25 | 6   | (M+H)+ | 1            |
| Arg1                                                                                                                                                      | 7,3        | 231,201 | 70,1  | 21 | 39 | 8   | (M+H)+ | 1            |
| Arg2                                                                                                                                                      | 7,3        | 231,276 | 60    | 21 | 33 | 8   | (M+H)+ | 1            |
| Arg3                                                                                                                                                      | 7,3        | 231,276 | 172,2 | 21 | 21 | 8   | (M+H)+ | 1            |
| ArgIS                                                                                                                                                     | 7,3        | 236,201 | 75,1  | 21 | 39 | 8   | (M+H)+ | 1            |
| Asn1                                                                                                                                                      | 5,4        | 189,303 | 144,1 | 21 | 17 | 6   | (M+H)+ | 1            |
| Asn2                                                                                                                                                      | 5,4        | 189,303 | 74    | 21 | 27 | 8   | (M+H)+ | 1            |
| Asn3                                                                                                                                                      | 5,4        | 189,303 | 130,3 | 21 | 19 | 4   | (M+H)+ | 1            |
| AsnIS                                                                                                                                                     | 5,4        | 191,116 | 145,2 | 21 | 19 | 6   | (M+H)+ | 1            |
| Asp1                                                                                                                                                      | 13,8       | 246,262 | 144,3 | 21 | 19 | 6   | (M+H)+ | 1            |
| Asp2                                                                                                                                                      | 13,8       | 246,262 | 88,1  | 21 | 27 | 2   | (M+H)+ | 1            |
| Asp3                                                                                                                                                      | 13,8       | 246,262 | 74,2  | 21 | 35 | 8   | (M+H)+ | 1            |
| AspIS                                                                                                                                                     | 13,8       | 249,278 | 147,3 | 16 | 19 | 6   | (M+H)+ | 1            |
| Cit1                                                                                                                                                      | 6,3        | 232,249 | 70,1  | 16 | 43 | 8   | (M+H)+ | 1            |
| Cit2                                                                                                                                                      | 6,3        | 232,249 | 215,3 | 16 | 17 | 10  | (M+H)+ | 1            |
| Cit3                                                                                                                                                      | 6,3        | 232,249 | 113,2 | 16 | 27 | 4   | (M+H)+ | 1            |
| CitIS                                                                                                                                                     | 6,3        | 234,237 | 115,2 | 16 | 27 | 4   | (M+H)+ | 1            |

|       |      |         |       |    |    |    |        |   |
|-------|------|---------|-------|----|----|----|--------|---|
| Cys1  | 11,8 | 353,133 | 129,9 | 21 | 29 | 14 | (M+H)+ | 1 |
| Cys2  | 11,8 | 353,078 | 73,9  | 21 | 47 | 8  | (M+H)+ | 1 |
| Cys3  | 11,8 | 353,078 | 208,1 | 21 | 21 | 8  | (M+H)+ | 1 |
| CysIS | 11,8 | 357,133 | 129,9 | 21 | 29 | 14 | (M+H)+ | 1 |
| Gln1  | 5,6  | 203,1   | 84,1  | 11 | 30 | 11 | (M+H)+ | 1 |
| Gln2  | 5,6  | 203,1   | 186,1 | 11 | 16 | 8  | (M+H)+ | 1 |
| Gln3  | 5,6  | 203,1   | 130,1 | 11 | 21 | 15 | (M+H)+ | 1 |
| GlnIS | 5,6  | 208,1   | 89,1  | 11 | 30 | 11 | (M+H)+ | 1 |
| Glu1  | 14,3 | 260,312 | 84    | 16 | 37 | 10 | (M+H)+ | 1 |
| Glu2  | 14,3 | 260,312 | 186,2 | 16 | 19 | 8  | (M+H)+ | 1 |
| Glu3  | 14,3 | 260,312 | 130,1 | 16 | 25 | 4  | (M+H)+ | 1 |
| GluIS | 14,3 | 263,297 | 87,1  | 16 | 35 | 10 | (M+H)+ | 1 |
| Gly1  | 6,2  | 132,19  | 76    | 16 | 13 | 8  | (M+H)+ | 1 |
| Gly2  | 6,2  | 132,19  | 57    | 16 | 19 | 6  | (M+H)+ | 1 |
| GlyIS | 6,2  | 134,17  | 77,9  | 16 | 13 | 10 | (M+H)+ | 1 |
| His1  | 6,8  | 212,18  | 109,9 | 16 | 27 | 14 | (M+H)+ | 1 |
| His2  | 6,8  | 212,271 | 83,1  | 21 | 41 | 10 | (M+H)+ | 1 |
| His3  | 6,8  | 212,271 | 93    | 21 | 41 | 8  | (M+H)+ | 1 |
| HisIS | 6,8  | 215,184 | 112,9 | 16 | 27 | 14 | (M+H)+ | 1 |
| Ile1  | 12,4 | 188,327 | 86    | 21 | 21 | 10 | (M+H)+ | 1 |
| Ile2  | 12,4 | 188,327 | 69    | 21 | 33 | 8  | (M+H)+ | 1 |
| Ile3  | 12,4 | 188,327 | 44,1  | 21 | 43 | 4  | (M+H)+ | 1 |
| Leu1  | 12,6 | 188,2   | 86    | 21 | 21 | 10 | (M+H)+ | 1 |
| Leu2  | 12,6 | 188,2   | 69    | 21 | 33 | 8  | (M+H)+ | 1 |
| Leu3  | 12,6 | 188,2   | 44,1  | 21 | 43 | 4  | (M+H)+ | 1 |
| LeuIS | 12,6 | 191,338 | 89,2  | 11 | 19 | 2  | (M+H)+ | 1 |
| Lys1  | 7,2  | 203,2   | 84,1  | 21 | 33 | 2  | (M+H)+ | 1 |
| Lys2  | 7,2  | 203,2   | 186,2 | 21 | 17 | 8  | (M+H)+ | 1 |
| Lys3  | 7,2  | 203,2   | 56    | 21 | 61 | 6  | (M+H)+ | 1 |
| LysIS | 7,2  | 207,2   | 88,1  | 21 | 33 | 2  | (M+H)+ | 1 |
| Met1  | 10,9 | 206,245 | 104,1 | 31 | 19 | 4  | (M+H)+ | 1 |
| Met2  | 10,9 | 206,245 | 61,1  | 31 | 41 | 6  | (M+H)+ | 1 |
| Met3  | 10,9 | 206,245 | 56    | 31 | 31 | 6  | (M+H)+ | 1 |
| MetIS | 10,9 | 209,2   | 107,1 | 11 | 30 | 5  | (M+H)+ | 1 |
| Orn1  | 6,7  | 189,304 | 70,1  | 16 | 29 | 8  | (M+H)+ | 1 |
| Orn2  | 6,7  | 189,304 | 172,2 | 16 | 15 | 8  | (M+H)+ | 1 |
| Orn3  | 6,7  | 189,304 | 116,1 | 16 | 21 | 6  | (M+H)+ | 1 |
| OrnIS | 6,7  | 191,338 | 174,1 | 11 | 15 | 8  | (M+H)+ | 1 |
| Phe1  | 12,8 | 222,248 | 120,3 | 21 | 23 | 4  | (M+H)+ | 1 |
| Phe2  | 12,8 | 222,248 | 103,1 | 21 | 49 | 10 | (M+H)+ | 1 |
| Phe3  | 12,8 | 222,248 | 77    | 21 | 69 | 8  | (M+H)+ | 1 |
| PheIS | 12,8 | 228,284 | 126,2 | 16 | 21 | 6  | (M+H)+ | 1 |
| Pro1  | 7,8  | 172,291 | 70,1  | 26 | 25 | 8  | (M+H)+ | 1 |

|                                   |       |         |         |      |     |     |        |   |
|-----------------------------------|-------|---------|---------|------|-----|-----|--------|---|
| Pro2                              | 7,8   | 172,291 | 116,2   | 26   | 19  | 4   | (M+H)+ | 1 |
| Pro3                              | 7,8   | 172,291 | 57,1    | 26   | 27  | 6   | (M+H)+ | 1 |
| ProIS                             | 7,8   | 175,18  | 73      | 16   | 27  | 8   | (M+H)+ | 1 |
| Pro2IS                            | 7,8   | 175,18  | 118,9   | 16   | 21  | 16  | (M+H)+ | 1 |
| Ser1                              | 6     | 162,255 | 60      | 16   | 23  | 6   | (M+H)+ | 1 |
| Ser2                              | 6     | 162,255 | 106,2   | 16   | 15  | 4   | (M+H)+ | 1 |
| Ser3                              | 6     | 162,255 | 88,3    | 16   | 19  | 2   | (M+H)+ | 1 |
| SerIS                             | 6     | 165,255 | 63      | 16   | 23  | 6   | (M+H)+ | 1 |
| Thr1                              | 7,2   | 176,24  | 73,9    | 16   | 23  | 10  | (M+H)+ | 1 |
| Thr2                              | 7,2   | 176,24  | 55,9    | 16   | 31  | 6   | (M+H)+ | 1 |
| Thr3                              | 7,2   | 176,24  | 102,1   | 16   | 19  | 4   | (M+H)+ | 1 |
| ThrIS                             | 7,2   | 180,24  | 75,9    | 16   | 23  | 10  | (M+H)+ | 1 |
| Trp1                              | 13,3  | 261,284 | 244,2   | 21   | 17  | 10  | (M+H)+ | 1 |
| Trp2                              | 13,3  | 261,284 | 159,3   | 21   | 25  | 6   | (M+H)+ | 1 |
| Trp3                              | 13,3  | 261,284 | 132,4   | 21   | 41  | 6   | (M+H)+ | 1 |
| TrpIS                             | 13,3  | 266,284 | 249,2   | 21   | 17  | 10  | (M+H)+ | 1 |
| Tyr1                              | 10,24 | 238,241 | 136,1   | 21   | 23  | 6   | (M+H)+ | 1 |
| Tyr2                              | 10,24 | 238,241 | 91,2    | 21   | 47  | 4   | (M+H)+ | 1 |
| Tyr3                              | 10,24 | 238,241 | 119,2   | 21   | 37  | 4   | (M+H)+ | 1 |
| TyrIS                             | 10,24 | 244,266 | 142,2   | 16   | 23  | 8   | (M+H)+ | 1 |
| Val1                              | 10,8  | 174,213 | 72      | 16   | 19  | 8   | (M+H)+ | 1 |
| Val2                              | 10,8  | 174,213 | 55      | 16   | 41  | 6   | (M+H)+ | 1 |
| Val3                              | 10,8  | 174,213 | 118,2   | 16   | 15  | 6   | (M+H)+ | 1 |
| ValIS                             | 10,8  | 182,275 | 80,2    | 16   | 21  | 10  | (M+H)+ | 1 |
| <b>Non-esterified fatty acids</b> |       |         |         |      |     |     |        |   |
| 4_0                               | 0,7   | 87      | 87      | -45  | -8  | -7  | (M-H)- | 1 |
| 5_0                               | 0,8   | 101     | 101     | -45  | -8  | -7  | (M-H)- | 1 |
| 6_0                               | 1,0   | 115,1   | 115,1   | -50  | -8  | -7  | (M-H)- | 1 |
| 7_0                               | 1,2   | 129,1   | 129,1   | -50  | -8  | -7  | (M-H)- | 1 |
| 8_0                               | 1,6   | 143,1   | 143,1   | -55  | -8  | -7  | (M-H)- | 1 |
| 9_0                               | 2,0   | 157,1   | 157,1   | -55  | -8  | -7  | (M-H)- | 1 |
| 10_0                              | 2,4   | 171,146 | 171,146 | -60  | -8  | -13 | (M-H)- | 1 |
| 11_0                              | 2,7   | 185,162 | 185,162 | -65  | -8  | -11 | (M-H)- | 1 |
| 12_0                              | 3,1   | 199,178 | 199,178 | -68  | -8  | -11 | (M-H)- | 1 |
| 12_1                              | 2,6   | 197,162 | 197,162 | -72  | -8  | -7  | (M-H)- | 1 |
| 13_0                              | 3,5   | 213,193 | 213,193 | -70  | -8  | -17 | (M-H)- | 1 |
| 13_1                              | 2,9   | 211,178 | 211,178 | -74  | -8  | -7  | (M-H)- | 1 |
| 14_0                              | 3,9   | 227,209 | 227,209 | -120 | -25 | -13 | (M-H)- | 1 |
| 14_1                              | 3,3   | 225,193 | 225,193 | -75  | -8  | -13 | (M-H)- | 1 |
| 14_2                              | 2,7   | 223,178 | 223,178 | -78  | -8  | -7  | (M-H)- | 1 |
| 15_0                              | 4,2   | 241,225 | 241,225 | -75  | -8  | -7  | (M-H)- | 1 |
| 15_1                              | 3,7   | 239,209 | 239,209 | -75  | -10 | -7  | (M-H)- | 1 |
| 16_0                              | 4,6   | 255,24  | 255,24  | -150 | -35 | -13 | (M-H)- | 1 |

|         |     |         |         |      |     |     |        |   |
|---------|-----|---------|---------|------|-----|-----|--------|---|
| 16_1    | 4,0 | 253,225 | 253,225 | -78  | -30 | -13 | (M-H)- | 1 |
| 16_2    | 3,5 | 251,209 | 251,209 | -79  | -8  | -7  | (M-H)- | 1 |
| 16_3    | 2,9 | 249,193 | 249,193 | -78  | -8  | -7  | (M-H)- | 1 |
| 16_4    | 2,4 | 247,178 | 247,178 | -78  | -8  | -7  | (M-H)- | 1 |
| 17_0    | 5,0 | 269,256 | 269,256 | -85  | -12 | -7  | (M-H)- | 1 |
| 17_1    | 4,4 | 267,24  | 267,24  | -75  | -10 | -7  | (M-H)- | 1 |
| 17_2    | 3,9 | 265,225 | 265,225 | -79  | -8  | -7  | (M-H)- | 1 |
| 18_0    | 5,4 | 283,272 | 283,272 | -150 | -35 | -7  | (M-H)- | 1 |
| 18_1    | 4,8 | 281,256 | 281,256 | -150 | -37 | -7  | (M-H)- | 1 |
| 18_2    | 4,2 | 279,24  | 279,24  | -130 | -32 | -7  | (M-H)- | 1 |
| 18_3    | 3,7 | 277,225 | 277,225 | -120 | -10 | -7  | (M-H)- | 1 |
| 18_4    | 3,1 | 275,209 | 275,209 | -72  | -8  | -7  | (M-H)- | 1 |
| 19_0    | 5,7 | 297,287 | 297,287 | -90  | -8  | -7  | (M-H)- | 1 |
| 19_1    | 5,2 | 295,272 | 295,272 | -85  | -8  | -7  | (M-H)- | 1 |
| 19_2    | 4,6 | 293,256 | 293,256 | -80  | -8  | -7  | (M-H)- | 1 |
| 20_0    | 6,1 | 311,303 | 311,303 | -95  | -8  | -13 | (M-H)- | 1 |
| 20_1    | 5,5 | 309,287 | 309,287 | -90  | -8  | -9  | (M-H)- | 1 |
| 20_2    | 5,0 | 307,272 | 307,272 | -85  | -8  | -9  | (M-H)- | 1 |
| 20_3    | 4,4 | 305,256 | 305,256 | -80  | -8  | -9  | (M-H)- | 1 |
| 20_4    | 3,9 | 303,24  | 303,24  | -150 | -10 | -9  | (M-H)- | 1 |
| 20_5    | 3,3 | 301,225 | 301,225 | -61  | -8  | -7  | (M-H)- | 1 |
| 22_0    | 6,8 | 339,334 | 339,334 | -100 | -14 | -11 | (M-H)- | 1 |
| 22_1    | 6,3 | 337,318 | 337,318 | -80  | -8  | -9  | (M-H)- | 1 |
| 22_2    | 5,7 | 335,303 | 335,303 | -80  | -8  | -11 | (M-H)- | 1 |
| 22_3    | 5,2 | 333,287 | 333,287 | -71  | -8  | -7  | (M-H)- | 1 |
| 22_4    | 4,6 | 331,272 | 331,272 | -62  | -8  | -7  | (M-H)- | 1 |
| 22_5    | 4,0 | 329,256 | 329,256 | -53  | -8  | -7  | (M-H)- | 1 |
| 22_6    | 3,5 | 327,24  | 327,24  | -150 | -6  | -13 | (M-H)- | 1 |
| 24_0    | 7,6 | 367,365 | 367,365 | -106 | -8  | -7  | (M-H)- | 1 |
| 24_1    | 7,0 | 365,35  | 365,35  | -97  | -8  | -11 | (M-H)- | 1 |
| 24_2    | 6,5 | 363,334 | 363,334 | -81  | -8  | -7  | (M-H)- | 1 |
| 24_3    | 5,9 | 361,318 | 361,318 | -69  | -8  | -7  | (M-H)- | 1 |
| 24_4    | 5,4 | 359,303 | 359,303 | -57  | -8  | -7  | (M-H)- | 1 |
| 24_5    | 4,8 | 357,287 | 357,287 | -44  | -8  | -7  | (M-H)- | 1 |
| 24_6    | 4,2 | 355,272 | 355,272 | -32  | -8  | -7  | (M-H)- | 1 |
| 26_0    | 8,3 | 395,397 | 395,397 | -113 | -8  | -7  | (M-H)- | 1 |
| 26_1    | 7,8 | 393,381 | 393,381 | -97  | -8  | -7  | (M-H)- | 1 |
| 26_2    | 7,2 | 391,365 | 391,365 | -82  | -8  | -7  | (M-H)- | 1 |
| 26_3    | 6,7 | 389,35  | 389,35  | -67  | -8  | -7  | (M-H)- | 1 |
| 26_4    | 6,1 | 387,334 | 387,334 | -52  | -8  | -7  | (M-H)- | 1 |
| 26_5    | 5,5 | 385,318 | 385,318 | -36  | -8  | -7  | (M-H)- | 1 |
| 26_6    | 5,0 | 383,303 | 383,303 | -21  | -8  | -7  | (M-H)- | 1 |
| 16_0-IS | 4,1 | 271     | 271     | -80  | -10 | -7  | (M-H)- | 1 |

|                                                                                                                                                                                                                                                                                                                           |     |        |        |      |     |     |        |   |
|---------------------------------------------------------------------------------------------------------------------------------------------------------------------------------------------------------------------------------------------------------------------------------------------------------------------------|-----|--------|--------|------|-----|-----|--------|---|
| 20_4-IS                                                                                                                                                                                                                                                                                                                   | 3,7 | 311,24 | 311,24 | -70  | -10 | -9  | (M-H)- | 1 |
| 22_6-IS                                                                                                                                                                                                                                                                                                                   | 3,6 | 332,24 | 332,24 | -40  | -6  | -13 | (M-H)- | 1 |
| 22_0-IS                                                                                                                                                                                                                                                                                                                   | 5,9 | 342,33 | 342,33 | -100 | -14 | -11 | (M-H)- | 1 |
| 10_0-IS                                                                                                                                                                                                                                                                                                                   | 2,4 | 190,15 | 190,15 | -60  | -8  | -13 | (M-H)- | 1 |
| 6_0-IS                                                                                                                                                                                                                                                                                                                    | 0,9 | 126,1  | 126,1  | -50  | -8  | -7  | (M-H)- | 1 |
| ID metabolite identity, Rt retention time in minutes, Q1/Q3 quadrupole 1 and 3, IS internal standard, DP declustering potential, CE collision energy, CXP collision cell exit potential, MSI ID Metabolomics Standards Initiative identification.<br>*The numbers next to the ID refer to the different transitions used. |     |        |        |      |     |     |        |   |

| Parameters for mass-spectrometry detection and identifications for phospholipids and acyl-carnitines. |               |       |      |         |        |        |              |
|-------------------------------------------------------------------------------------------------------|---------------|-------|------|---------|--------|--------|--------------|
| ID                                                                                                    | Sofia.ID      | Q1    | Q3   | CP1     | CP2    | Adduct | MSI ID Level |
| Carn.C0                                                                                               | Carn          | 162,1 | 85,1 | 29,25   | 29,85  | (M+H)+ | 1            |
| Carn.C10                                                                                              | Carn.C10      | 316,2 | 85,1 | 0,1465  | 0,1395 | (M+H)+ | 1            |
| Carn.C10.1                                                                                            | Carn.C10.1    | 314,2 | 85,1 | 0,13    | 0,122  | (M+H)+ | 1            |
| Carn.C10.2                                                                                            | Carn.C10.2    | 312,2 | 85,1 | 0,0275  | 0,0275 | (M+H)+ | 1            |
| Carn.C12                                                                                              | Carn.C12      | 344,3 | 85,1 | 0,06975 | 0,0705 | (M+H)+ | 1            |
| Carn.C12.1                                                                                            | Carn.C12.1    | 342,3 | 85,1 | 0,13875 | 0,1245 | (M+H)+ | 1            |
| Carn.C12.DC                                                                                           | Carn.C12.DC   | 374,3 | 85,1 | 0,0475  | 0,0495 | (M+H)+ | 1            |
| Carn.C14                                                                                              | Carn.C14      | 372,3 | 85,1 | 0,03875 | 0,037  | (M+H)+ | 1            |
| Carn.C14.1                                                                                            | Carn.C14.1    | 370,3 | 85,1 | 0,07725 | 0,078  | (M+H)+ | 1            |
| Carn.C14.1.OH                                                                                         | Carn.C14.1.OH | 386,3 | 85,1 | 0,0095  | 0,0095 | (M+H)+ | 1            |
| Carn.C14.2                                                                                            | Carn.C14.2    | 368,3 | 85,1 | 0,014   | 0,0135 | (M+H)+ | 1            |
| Carn.C14.2.OH                                                                                         | Carn.C14.2.OH | 384,3 | 85,1 | 0,0075  | 0,007  | (M+H)+ | 1            |
| Carn.C16                                                                                              | Carn.C16      | 400,3 | 85,1 | 0,075   | 0,0775 | (M+H)+ | 1            |
| Carn.C16.1                                                                                            | Carn.C16.1    | 398,3 | 85,1 | 0,02625 | 0,027  | (M+H)+ | 1            |
| Carn.C16.1.OH                                                                                         | Carn.C16.1.OH | 414,3 | 85,1 | 0,01    | 0,0095 | (M+H)+ | 1            |
| Carn.C16.2                                                                                            | Carn.C16.2    | 396,3 | 85,1 | 0,0045  | 0,005  | (M+H)+ | 1            |
| Carn.C16.2.OH                                                                                         | Carn.C16.2.OH | 412,3 | 85,1 | 0,01    | 0,0095 | (M+H)+ | 1            |
| Carn.C16.OH                                                                                           | Carn.C16.OH   | 416,3 | 85,1 | 0,0055  | 0,0055 | (M+H)+ | 1            |
| Carn.C18                                                                                              | Carn.C18      | 428,4 | 85,1 | 0,03425 | 0,0355 | (M+H)+ | 1            |
| Carn.C18.1                                                                                            | Carn.C18.1    | 426,4 | 85,1 | 0,0915  | 0,0915 | (M+H)+ | 1            |
| Carn.C18.1.OH                                                                                         | Carn.C18.1.OH | 442,4 | 85,1 | 0,0075  | 0,0075 | (M+H)+ | 1            |
| Carn.C18.2                                                                                            | Carn.C18.2    | 424,3 | 85,1 | 0,043   | 0,043  | (M+H)+ | 1            |
| Carn.C2                                                                                               | Carn.C2       | 204,1 | 85,1 | 4,48    | 4,52   | (M+H)+ | 1            |
| Carn.C3                                                                                               | Carn.C3       | 218,1 | 85,1 | 0,345   | 0,355  | (M+H)+ | 1            |
| Carn.C3.1                                                                                             | Carn.C3.1     | 216,1 | 85,1 | 0,0055  | 0,005  | (M+H)+ | 1            |
| Carn.C3.DC.C4.OH.                                                                                     | Carn.C3.DC    | 248,1 | 85,1 | 0,03875 | 0,0495 | (M+H)+ | 1            |
| Carn.C3.OH                                                                                            | Carn.C3.OH    | 234,1 | 85,1 | 0,02125 | 0,022  | (M+H)+ | 1            |
| Carn.C4                                                                                               | Carn.C4       | 232,2 | 85,1 | 0,179   | 0,1875 | (M+H)+ | 1            |
| Carn.C4.1                                                                                             | Carn.C4.1     | 230,1 | 85,1 | 0,019   | 0,019  | (M+H)+ | 1            |
| Carn.C5                                                                                               | Carn.C5       | 246,2 | 85,1 | 0,10375 | 0,103  | (M+H)+ | 1            |
| Carn.C5.1                                                                                             | Carn.C5.1     | 244,2 | 85,1 | 0,0195  | 0,02   | (M+H)+ | 1            |
| Carn.C5.1.DC                                                                                          | Carn.C5.1.DC  | 274,1 | 85,1 | 0,0175  | 0,015  | (M+H)+ | 1            |

|                     |                 |       |      |         |        |        |   |
|---------------------|-----------------|-------|------|---------|--------|--------|---|
| Carn.C5.DC.C6.OH.   | Carn.C5.DC      | 276,1 | 85,1 | 0,01925 | 0,0205 | (M+H)+ | 1 |
| Carn.C5.M.DC        | Carn.C5.M.DC    | 290,2 | 85,1 | 0,03225 | 0,031  | (M+H)+ | 1 |
| Carn.C5.OH.C3.DC.M. | Carn.C5.OH      | 262,2 | 85,1 | 0,0575  | 0,0615 | (M+H)+ | 1 |
| Carn.C6.1           | Carn.C6.1       | 258,2 | 85,1 | 0,0125  | 0,0125 | (M+H)+ | 1 |
| Carn.C6.C4.1.DC.    | Carn.C6         | 260,2 | 85,1 | 0,04475 | 0,046  | (M+H)+ | 1 |
| Carn.C7.DC          | Carn.C7.DC      | 304,2 | 85,1 | 0,02575 | 0,027  | (M+H)+ | 1 |
| Carn.C8             | Carn.C8         | 288,2 | 85,1 | 0,1105  | 0,1195 | (M+H)+ | 1 |
| Carn.C8.1           | Carn.C8.1       | 286,2 | 85,1 | 0,07525 | 0,0745 | (M+H)+ | 1 |
| Carn.C9             | Carn.C9         | 302,2 | 85,1 | 0,03425 | 0,034  | (M+H)+ | 1 |
| lysoPCaC14.0        | lyso.PC.a.C14.0 | 468,3 | 184  | 2,575   | 2,615  | (M+H)+ | 1 |
| lysoPCaC16.0        | lyso.PC.a.C16.0 | 496,3 | 184  | 98,775  | 95,6   | (M+H)+ | 1 |
| lysoPCaC16.1        | lyso.PC.a.C16.1 | 494,3 | 184  | 3       | 2,96   | (M+H)+ | 1 |
| lysoPCaC17.0        | lyso.PC.a.C17.0 | 510,4 | 184  | 1,7325  | 1,66   | (M+H)+ | 1 |
| lysoPCaC18.0        | lyso.PC.a.C18.0 | 524,4 | 184  | 26,675  | 26,2   | (M+H)+ | 1 |
| lysoPCaC18.1        | lyso.PC.a.C18.1 | 522,4 | 184  | 18,275  | 18,05  | (M+H)+ | 1 |
| lysoPCaC18.2        | lyso.PC.a.C18.2 | 520,3 | 184  | 32,6    | 32,15  | (M+H)+ | 1 |
| lysoPCaC20.3        | lyso.PC.a.C20.3 | 546,4 | 184  | 1,96    | 2,03   | (M+H)+ | 1 |
| lysoPCaC20.4        | lyso.PC.a.C20.4 | 544,3 | 184  | 6,5375  | 6,48   | (M+H)+ | 1 |
| lysoPCaC24.0        | lyso.PC.a.C24.0 | 608,5 | 184  | 0,76625 | 0,8805 | (M+H)+ | 1 |
| lysoPCaC26.0        | lyso.PC.a.C26.0 | 636,5 | 184  | 1,815   | 2,22   | (M+H)+ | 1 |
| lysoPCaC26.1        | lyso.PC.a.C26.1 | 634,5 | 184  | 3,4275  | 3,71   | (M+H)+ | 1 |
| lysoPCaC28.0        | lyso.PC.a.C28.0 | 664,5 | 184  | 1,3125  | 1,535  | (M+H)+ | 1 |
| lysoPCaC28.1        | lyso.PC.a.C28.1 | 662,5 | 184  | 1,52    | 1,785  | (M+H)+ | 1 |
| lysoPCaC6.0         | lyso.PC.a.C6.0  | 356,2 | 184  | 0,05025 | 0,0455 | (M+H)+ | 1 |
| PCaaC24.0           | PC.aa.C24.0     | 622,4 | 184  | 0,4935  | 0,596  | (M+H)+ | 1 |
| PCaaC26.0           | PC.aa.C26.0     | 650,5 | 184  | 2,735   | 3,33   | (M+H)+ | 1 |
| PCaaC28.1           | PC.aa.C28.1     | 676,5 | 184  | 2,6525  | 2,775  | (M+H)+ | 1 |
| PCaaC30.0           | PC.aa.C30.0     | 706,5 | 184  | 3,49    | 3,535  | (M+H)+ | 1 |
| PCaaC30.2           | PC.aa.C30.2     | 702,5 | 184  | 0,51625 | 0,548  | (M+H)+ | 1 |
| PCaaC32.0           | PC.aa.C32.0     | 734,6 | 184  | 11      | 11,05  | (M+H)+ | 1 |
| PCaaC32.1           | PC.aa.C32.1     | 732,6 | 184  | 13,3    | 13,75  | (M+H)+ | 1 |
| PCaaC32.2           | PC.aa.C32.2     | 730,5 | 184  | 2,8125  | 2,87   | (M+H)+ | 1 |
| PCaaC32.3           | PC.aa.C32.3     | 728,5 | 184  | 0,5415  | 0,525  | (M+H)+ | 1 |
| PCaaC34.1           | PC.aa.C34.1     | 760,6 | 184  | 167,5   | 167,5  | (M+H)+ | 1 |
| PCaaC34.2           | PC.aa.C34.2     | 758,6 | 184  | 278,75  | 282    | (M+H)+ | 1 |
| PCaaC34.3           | PC.aa.C34.3     | 756,6 | 184  | 14,65   | 13,6   | (M+H)+ | 1 |
| PCaaC34.4           | PC.aa.C34.4     | 754,5 | 184  | 1,675   | 1,65   | (M+H)+ | 1 |
| PCaaC36.0           | PC.aa.C36.0     | 790,6 | 184  | 2,305   | 2,095  | (M+H)+ | 1 |
| PCaaC36.1           | PC.aa.C36.1     | 788,6 | 184  | 35,4    | 34,15  | (M+H)+ | 1 |
| PCaaC36.2           | PC.aa.C36.2     | 786,6 | 184  | 170,5   | 173    | (M+H)+ | 1 |
| PCaaC36.3           | PC.aa.C36.3     | 784,6 | 184  | 97,8    | 98,9   | (M+H)+ | 1 |
| PCaaC36.4           | PC.aa.C36.4     | 782,6 | 184  | 125     | 127    | (M+H)+ | 1 |
| PCaaC36.5           | PC.aa.C36.5     | 780,6 | 184  | 15,975  | 15,75  | (M+H)+ | 1 |

|           |             |       |     |         |        |        |   |
|-----------|-------------|-------|-----|---------|--------|--------|---|
| PCaaC36.6 | PC.aa.C36.6 | 778,5 | 184 | 0,9525  | 0,848  | (M+H)+ | 1 |
| PCaaC38.0 | PC.aa.C38.0 | 818,7 | 184 | 1,8325  | 1,81   | (M+H)+ | 1 |
| PCaaC38.1 | PC.aa.C38.1 | 816,6 | 184 | 1,17    | 0,9875 | (M+H)+ | 1 |
| PCaaC38.3 | PC.aa.C38.3 | 812,6 | 184 | 29,275  | 28,55  | (M+H)+ | 1 |
| PCaaC38.4 | PC.aa.C38.4 | 810,6 | 184 | 69,225  | 72,3   | (M+H)+ | 1 |
| PCaaC38.5 | PC.aa.C38.5 | 808,6 | 184 | 34,775  | 35,8   | (M+H)+ | 1 |
| PCaaC38.6 | PC.aa.C38.6 | 806,6 | 184 | 47,4    | 49,6   | (M+H)+ | 1 |
| PCaaC40.1 | PC.aa.C40.1 | 844,7 | 184 | 0,457   | 0,425  | (M+H)+ | 1 |
| PCaaC40.2 | PC.aa.C40.2 | 842,7 | 184 | 0,51675 | 0,436  | (M+H)+ | 1 |
| PCaaC40.3 | PC.aa.C40.3 | 840,6 | 184 | 0,72825 | 0,646  | (M+H)+ | 1 |
| PCaaC40.4 | PC.aa.C40.4 | 838,6 | 184 | 2,4325  | 2,51   | (M+H)+ | 1 |
| PCaaC40.5 | PC.aa.C40.5 | 836,6 | 184 | 6,835   | 7,19   | (M+H)+ | 1 |
| PCaaC40.6 | PC.aa.C40.6 | 834,6 | 184 | 15,6    | 16,6   | (M+H)+ | 1 |
| PCaaC42.0 | PC.aa.C42.0 | 874,7 | 184 | 0,4535  | 0,4445 | (M+H)+ | 1 |
| PCaaC42.1 | PC.aa.C42.1 | 872,7 | 184 | 0,2585  | 0,245  | (M+H)+ | 1 |
| PCaaC42.2 | PC.aa.C42.2 | 870,7 | 184 | 0,2725  | 0,233  | (M+H)+ | 1 |
| PCaaC42.4 | PC.aa.C42.4 | 866,7 | 184 | 0,248   | 0,222  | (M+H)+ | 1 |
| PCaaC42.5 | PC.aa.C42.5 | 864,6 | 184 | 0,3165  | 0,3175 | (M+H)+ | 1 |
| PCaaC42.6 | PC.aa.C42.6 | 862,6 | 184 | 0,55475 | 0,58   | (M+H)+ | 1 |
| PCaeC30.0 | PC.ae.C30.0 | 692,6 | 184 | 0,432   | 0,4415 | (M+H)+ | 1 |
| PCaeC30.1 | PC.ae.C30.1 | 690,5 | 184 | 0,691   | 0,882  | (M+H)+ | 1 |
| PCaeC30.2 | PC.ae.C30.2 | 688,5 | 184 | 0,249   | 0,2505 | (M+H)+ | 1 |
| PCaeC32.1 | PC.ae.C32.1 | 718,6 | 184 | 2,2625  | 2,28   | (M+H)+ | 1 |
| PCaeC32.2 | PC.ae.C32.2 | 716,6 | 184 | 0,798   | 0,8295 | (M+H)+ | 1 |
| PCaeC34.0 | PC.ae.C34.0 | 748,6 | 184 | 1,3025  | 1,275  | (M+H)+ | 1 |
| PCaeC34.1 | PC.ae.C34.1 | 746,6 | 184 | 7,3125  | 7,285  | (M+H)+ | 1 |
| PCaeC34.2 | PC.ae.C34.2 | 744,6 | 184 | 8,33    | 8,28   | (M+H)+ | 1 |
| PCaeC34.3 | PC.ae.C34.3 | 742,6 | 184 | 5,845   | 6,035  | (M+H)+ | 1 |
| PCaeC36.0 | PC.ae.C36.0 | 776,7 | 184 | 0,765   | 0,7355 | (M+H)+ | 1 |
| PCaeC36.1 | PC.ae.C36.1 | 774,6 | 184 | 7,6675  | 6,57   | (M+H)+ | 1 |
| PCaeC36.2 | PC.ae.C36.2 | 772,6 | 184 | 11,525  | 10,75  | (M+H)+ | 1 |
| PCaeC36.3 | PC.ae.C36.3 | 770,6 | 184 | 5,5775  | 5,515  | (M+H)+ | 1 |
| PCaeC36.4 | PC.ae.C36.4 | 768,6 | 184 | 11,05   | 11,15  | (M+H)+ | 1 |
| PCaeC36.5 | PC.ae.C36.5 | 766,6 | 184 | 7,2275  | 7,405  | (M+H)+ | 1 |
| PCaeC38.0 | PC.ae.C38.0 | 804,7 | 184 | 2,195   | 2,045  | (M+H)+ | 1 |
| PCaeC38.1 | PC.ae.C38.1 | 802,7 | 184 | 1,8875  | 1,41   | (M+H)+ | 1 |
| PCaeC38.2 | PC.ae.C38.2 | 800,7 | 184 | 3,125   | 2,535  | (M+H)+ | 1 |
| PCaeC38.3 | PC.ae.C38.3 | 798,6 | 184 | 5,1625  | 4,68   | (M+H)+ | 1 |
| PCaeC38.4 | PC.ae.C38.4 | 796,6 | 184 | 9,3975  | 9,28   | (M+H)+ | 1 |
| PCaeC38.5 | PC.ae.C38.5 | 794,6 | 184 | 10,525  | 10,55  | (M+H)+ | 1 |
| PCaeC38.6 | PC.ae.C38.6 | 792,6 | 184 | 4,71    | 4,805  | (M+H)+ | 1 |
| PCaeC40.0 | PC.ae.C40.0 | 832,7 | 184 | 7,225   | 7,365  | (M+H)+ | 1 |
| PCaeC40.1 | PC.ae.C40.1 | 830,7 | 184 | 1,555   | 1,55   | (M+H)+ | 1 |

|                |                   |       |     |         |        |        |   |
|----------------|-------------------|-------|-----|---------|--------|--------|---|
| PCaeC40.2      | PC.ae.C40.2       | 828,7 | 184 | 1,7025  | 1,6    | (M+H)+ | 1 |
| PCaeC40.3      | PC.ae.C40.3       | 826,7 | 184 | 1,65    | 1,45   | (M+H)+ | 1 |
| PCaeC40.4      | PC.ae.C40.4       | 824,7 | 184 | 2,0575  | 1,955  | (M+H)+ | 1 |
| PCaeC40.5      | PC.ae.C40.5       | 822,6 | 184 | 3,285   | 3,24   | (M+H)+ | 1 |
| PCaeC40.6      | PC.ae.C40.6       | 820,6 | 184 | 2,885   | 2,93   | (M+H)+ | 1 |
| PCaeC42.0      | PC.ae.C42.0       | 860,7 | 184 | 0,52825 | 0,533  | (M+H)+ | 1 |
| PCaeC42.1      | PC.ae.C42.1       | 858,7 | 184 | 0,53275 | 0,5395 | (M+H)+ | 1 |
| PCaeC42.2      | PC.ae.C42.2       | 856,7 | 184 | 0,54675 | 0,5235 | (M+H)+ | 1 |
| PCaeC42.3      | PC.ae.C42.3       | 854,7 | 184 | 1,065   | 0,9655 | (M+H)+ | 1 |
| PCaeC42.4      | PC.ae.C42.4       | 852,7 | 184 | 0,83025 | 0,7745 | (M+H)+ | 1 |
| PCaeC42.5      | PC.ae.C42.5       | 850,7 | 184 | 1,765   | 1,76   | (M+H)+ | 1 |
| PCaeC44.3      | PC.ae.C44.3       | 882,7 | 184 | 0,28225 | 0,219  | (M+H)+ | 1 |
| PCaeC44.4      | PC.ae.C44.4       | 880,7 | 184 | 0,4375  | 0,412  | (M+H)+ | 1 |
| PCaeC44.5      | PC.ae.C44.5       | 878,7 | 184 | 1,4725  | 1,51   | (M+H)+ | 1 |
| PCaeC44.6      | PC.ae.C44.6       | 876,7 | 184 | 0,85425 | 0,8785 | (M+H)+ | 1 |
| SM.OH.C14.1    | SM.C18.1.OH.C14.1 | 689,5 | 184 | 4,4825  | 4,26   | (M+H)+ | 1 |
| SM.OH.C16.1    | SM.C18.1.OH.C16.1 | 717,6 | 184 | 2,065   | 2,075  | (M+H)+ | 1 |
| SM.OH.C22.1    | SM.C18.1.OH.C22.1 | 801,6 | 184 | 8,58    | 8,365  | (M+H)+ | 1 |
| SM.OH.C22.2    | SM.C18.1.OH.C22.2 | 799,6 | 184 | 6,26    | 6,14   | (M+H)+ | 1 |
| SM.OH.C24.1    | SM.C18.1.OH.C24.1 | 829,7 | 184 | 0,9405  | 0,9585 | (M+H)+ | 1 |
| SMC16.0        | SM.C18.1.C16.0    | 703,6 | 184 | 76,4    | 75     | (M+H)+ | 1 |
| SMC16.1        | SM.C18.1.C16.1    | 701,6 | 184 | 10,525  | 10,55  | (M+H)+ | 1 |
| SMC18.0        | SM.C18.1.C18.0    | 731,6 | 184 | 14,575  | 14,35  | (M+H)+ | 1 |
| SMC18.1        | SM.C18.1.C18.1    | 729,6 | 184 | 7,1225  | 7,025  | (M+H)+ | 1 |
| SMC20.2        | SM.C18.1.C20.2    | 755,6 | 184 | 0,322   | 0,282  | (M+H)+ | 1 |
| SMC22.3        | SM.C18.1.C22.3    | 781,6 | 184 | 1,7625  | 1,755  | (M+H)+ | 1 |
| SMC24.0        | SM.C18.1.C24.0    | 815,7 | 184 | 14,8    | 14,3   | (M+H)+ | 1 |
| SMC24.1        | SM.C18.1.C24.1    | 813,7 | 184 | 33      | 32,15  | (M+H)+ | 1 |
| SMC26.0        | SM.C18.1.C26.0    | 843,7 | 184 | 0,07225 | 0,0815 | (M+H)+ | 1 |
| SMC26.1        | SM.C18.1.C26.1    | 841,7 | 184 | 0,28175 | 0,2855 | (M+H)+ | 1 |
| Sum of Hexoses | Sum of Hexoses    | 179   | 89  | 22237,5 | 22592  | (M+H)+ | 1 |

ID metabolite identity metabolomics laboratory. Sofia ID metabolite identity Generation R Study group. Q1/Q3 Quadrupole 1 and 3, CP1/CP2 Calibrators 1 and 2, MSI ID Metabolomics Standards Initiative identification.

This table is adapted from: Voerman, E., Jaddoe, V. W. V., Uhl, O., & Shokry, E. (2020). A population based resource for intergenerational metabolomics analysis in pregnant women and their children : the Generation R Study. *Metabolomics*, 1 – 26. Voerman et al. 2020 describes the acquisition, processing and structure of the metabolomics data in the Generation R study cohort. (7)



## REFERENCES

1. Hellmuth C, Uhl O, Standl M, Demmelmair H, Heinrich J, Koletzko B, Thiering E. Cord Blood Metabolome Is Highly Associated with Birth Weight, but Less Predictive for Later Weight Development. *Obes Facts*. 2017;10(2):85-100.
2. Harder U, Koletzko B, Peissner W. Quantification of 22 plasma amino acids combining derivatization and ion-pair LC-MS/MS. *J Chromatogr B Analyt Technol Biomed Life Sci*. 2011;879(7-8):495-504.
3. Hellmuth C, Weber M, Koletzko B, Peissner W. Nonesterified fatty acid determination for functional lipidomics: comprehensive ultrahigh performance liquid chromatography-tandem mass spectrometry quantitation, qualification, and parameter prediction. *Anal Chem*. 2012;84(3):1483-90.
4. Uhl O, Fleddermann M, Hellmuth C, Demmelmair H, Koletzko B. Phospholipid Species in Newborn and 4 Month Old Infants after Consumption of Different Formulas or Breast Milk. *PLoS One*. 2016;11(8):e0162040.
5. Rauschert S, Mori TA, Beilin LJ, Jacoby P, Uhl O, Koletzko B, et al. Early Life Factors, Obesity Risk, and the Metabolome of Young Adults. *Obesity (Silver Spring)*. 2017;25(9):1549-55.
6. Uhl O, Glaser C, Demmelmair H, Koletzko B. Reversed phase LC/MS/MS method for targeted quantification of glycerophospholipid molecular species in plasma. *J Chromatogr B Analyt Technol Biomed Life Sci*. 2011;879(30):3556-64.
7. Voerman E, Jaddoe VWV, Uhl O, Shokry E, Horak J, Felix JF, et al. A population-based resource for intergenerational metabolomics analyses in pregnant women and their children: the Generation R Study. *Metabolomics*. 2020;16(4):43.
